# Supplementary material
Source: publisher figshare collection journal article supplement (https://acs.figshare.com/ndownloader/files/3794437)
Supplement: Supplementary file 1 [file 3794437]

data_global
 

 
# 1. SUBMISSION DETAILS
#----------------------
 
_publ_contact_author_name
     'Skelton, B. W.'
_publ_contact_author_address
;
Centre for Microscopy, Characterisation and Analysis,
M313, University of Western Australia, 
Perth, WA 6009,
 Australia
;
_publ_contact_author_email            brian.skelton@uwa.edu.au
_publ_contact_author_fax               (+61)_08_6488_1118
_publ_contact_author_phone             (+61)_08_6488_7107
 

 
loop_
_publ_author_name
_publ_author_footnote
_publ_author_address
 
 
'Skelton, Brian W.' .
; 
Centre for Microscopy, Characterisation and Analysis,
M313, University of Western Australia, 
Perth, WA 6009,
 Australia
;


_publ_section_references
;

Brandenburg, K. ,(1999).DIAMOND.Crystal Impact GbR,
 Bonn, Germany.

Farrugia, L. J. (1999). J. Appl. Cryst. 32, 837-838. 
 
Oxford Diffraction (2006). CrysAlis CCD. Oxford Diffraction Ltd, 
Abingdon, England.

Oxford Diffraction (2006). CrysAlis RED. Oxford Diffraction Ltd, 
Abingdon, England.

Sheldrick, G. M. (2008). Acta Cryst. A64, 112-122.
;
 

 
#------------------  SECTION 2. COMPOUND(S) DETAILS -------------------------#
 
data_ps290a

_vrf_PLAT201_ps290a
;
PROBLEM: Isotropic non-H Atoms in Main Residue(s) .......         11   
RESPONSE: 
  Disordered atoms were refined with isotropic displacement parameters after
anisotropic refinement resulted in unacceptable ellipsoids even with
reasonable restraints.
;

_vrf_PLAT605_ps290a
;
PROBLEM: Structure Contains Solvent Accessible VOIDS of .        229 Ang3    
RESPONSE: 
No further electron could be modelled as solvent. Any such electron
density was effectively removed by use of the program squeeze.

;

_vrf_PLAT413_ps290a
;
PROBLEM: Short Inter XH3 .. XHn     H27B   ..  H84N    ..       1.98 Ang.    
RESPONSE:  
This contact involves a hydrogen atom from the minor component of the
disorder. Modelling other atoms involved in this contact as 
disordered was not warranted as the disorder would be very minor.

;

_vrf_PLAT971_ps290a
;
PROBLEM: Check Calcd Residual Density  1.05A From     C22       2.77 eA-3  
RESPONSE:  This residual electron density is 1.01 Angstroms from Ag1.

;

_database_code_depnum_ccdc_archive  '1008897'

 
_audit_creation_date                    2014-06-02T13:41:38-00:00
_audit_creation_method                  'WinGX routine CIF_UPDATE'
 
#----------------------------------------------------------------------------#
#                   CHEMICAL INFORMATION                                     #
#----------------------------------------------------------------------------#
 
_chemical_name_systematic
;
 ?
;
_chemical_formula_sum                   'C82 H111 Ag4 Br4 N9 O8'
_chemical_formula_moiety                'C80 H108 Ag4 Br4 N8 O8, C2 H3 N'
_chemical_formula_weight                2101.92
 
#----------------------------------------------------------------------------#
#                   UNIT CELL INFORMATION                                    #
#----------------------------------------------------------------------------#
 
_symmetry_cell_setting                  monoclinic
_symmetry_space_group_name_H-M          'P 1 21/n 1'
_symmetry_space_group_name_Hall        '-p 2yn'
loop_
    _symmetry_equiv_pos_as_xyz
'x, y, z'
'-x+1/2, y+1/2, -z+1/2'
'-x, -y, -z'
'x-1/2, -y-1/2, z-1/2'
 
_cell_length_a                          14.66770(10)
_cell_length_b                          35.8151(3)
_cell_length_c                          17.1801(2)
_cell_angle_alpha                       90
_cell_angle_beta                        91.9280(10)
_cell_angle_gamma                       90
_cell_volume                            9020.03(14)
_cell_formula_units_Z                   4
_cell_measurement_temperature           100(2)
_cell_measurement_reflns_used           36526
_cell_measurement_theta_min             2.5683
_cell_measurement_theta_max             67.0503
 
#----------------------------------------------------------------------------#
#                   CRYSTAL INFORMATION                                      #
#----------------------------------------------------------------------------#
 
_exptl_crystal_description              slab
_exptl_crystal_colour                   colourless
_exptl_crystal_size_max                 0.29
_exptl_crystal_size_mid                 0.18
_exptl_crystal_size_min                 0.08
_exptl_crystal_density_diffrn           1.548
_exptl_crystal_density_method           'not measured'
_exptl_crystal_F_000                    4232
_exptl_special_details
;
 ?
;
 
#----------------------------------------------------------------------------#
#                   ABSORPTION CORRECTION                                    #
#----------------------------------------------------------------------------#
 
_exptl_absorpt_coefficient_mu           9.376
_exptl_absorpt_correction_type          analytical
_exptl_absorpt_process_details
;
       CrysAlisPro, Oxford Diffraction Ltd.

;
_exptl_absorpt_correction_T_min         0.231
_exptl_absorpt_correction_T_max         0.535
 
#----------------------------------------------------------------------------#
#                   DATA COLLECTION                                          #
#----------------------------------------------------------------------------#
 
_diffrn_ambient_temperature             100(2)
_diffrn_radiation_wavelength            1.54178
_diffrn_radiation_type                  CuK\a
_diffrn_radiation_monochromator         graphite
_diffrn_detector_area_resol_mean        10.4738
_diffrn_orient_matrix_ub_11             -0.1039812799
_diffrn_orient_matrix_ub_12             0.0008240046
_diffrn_orient_matrix_ub_13             -0.0157406239
_diffrn_orient_matrix_ub_21             0.0142813607
_diffrn_orient_matrix_ub_22             0.0186648911
_diffrn_orient_matrix_ub_23             -0.0797926907
_diffrn_orient_matrix_ub_31             0.0048018867
_diffrn_orient_matrix_ub_32             -0.0387200889
_diffrn_orient_matrix_ub_33             -0.038574845
_diffrn_measurement_device_type  'Oxford Diffraction Gemini diffractometer'
_diffrn_reflns_av_R_equivalents         0.0415
_diffrn_reflns_av_unetI/netI            0.0242
_diffrn_reflns_number                   87468
_diffrn_reflns_limit_h_min              -17
_diffrn_reflns_limit_h_max              17
_diffrn_reflns_limit_k_min              -42
_diffrn_reflns_limit_k_max              32
_diffrn_reflns_limit_l_min              -20
_diffrn_reflns_limit_l_max              19
_diffrn_reflns_theta_min                2.85
_diffrn_reflns_theta_max                67.13
_diffrn_reflns_theta_full               67.13
_diffrn_measured_fraction_theta_full
                                        0.983
_diffrn_measured_fraction_theta_max
                                        0.983
_reflns_number_total                    15885
_reflns_number_gt                       13527
_reflns_threshold_expression            >2\s(I)
 
#----------------------------------------------------------------------------#
#                   COMPUTER PROGRAMS USED                                   #
#----------------------------------------------------------------------------#
 
_computing_data_collection
;
        CrysAlisPro, Oxford Diffraction Ltd.,
        Version 1.171.33.52 (release 06-11-2009 CrysAlis171 .NET)
        (compiled Nov  6 2009,16:24:50)
;
_computing_cell_refinement
;
        CrysAlisPro, Oxford Diffraction Ltd.,
        Version 1.171.33.52 (release 06-11-2009 CrysAlis171 .NET)
        (compiled Nov  6 2009,16:24:50)
;
_computing_data_reduction
;
        CrysAlisPro, Oxford Diffraction Ltd.,
        Version 1.171.33.52 (release 06-11-2009 CrysAlis171 .NET)
        (compiled Nov  6 2009,16:24:50)
;
_computing_structure_refinement         'SHELXL-97 (Sheldrick, 2008)'
_computing_molecular_graphics           'Diamond (Brandenburg, K., (1999)'
_computing_publication_material        'WinGX Farrugia, L. J. (1999)'

 
#----------------------------------------------------------------------------#
#                   STRUCTURE SOLUTION
#----------------------------------------------------------------------------#
 
_atom_sites_solution_primary            direct
_atom_sites_solution_secondary          difmap
_atom_sites_solution_hydrogens          geom
 
#----------------------------------------------------------------------------#
#                   REFINEMENT INFORMATION                                   #
#----------------------------------------------------------------------------#
 
_refine_special_details
;
 Refinement of F^2^ against ALL reflections.  The weighted R-factor wR and
 goodness of fit S are based on F^2^, conventional R-factors R are based
 on F, with F set to zero for negative F^2^. The threshold expression of
 F^2^ > 2\s(F^2^) is used only for calculating R-factors(gt) etc. and is
 not relevant to the choice of reflections for refinement.  R-factors based
 on F^2^ are statistically about twice as large as those based on F, and R-
 factors based on ALL data will be even larger.

Terminal atoms of several n-BuO chains and also the atoms of the solvent 
acetonitrile molecule were found to be disordered over 2 sites. Site occupancy 
factors were refined to 0.631(7) and 1-0.631(7) for the two components 
after trial refinement showed no significant differences between the 
individual refined parameters. 
 Geometries of the disordered atoms were restrained to ideal values. 
Anisotropic displacement parameters were employed throughout for the 
non-hydrogen atoms except for those of the disordered atoms which were 
refined with isotropic displacement parameters.  The unit cell exhibits voids 
of 229 A**3, although no significant residual electron density could be 
located which could be assigned to solvent molecules. Any such residual 
electron density was effectively removed by use of the program 
Squeeze.
;

_refine_ls_structure_factor_coef        Fsqd
_refine_ls_matrix_type                  full
_refine_ls_weighting_scheme             calc
_refine_ls_weighting_details
        'calc w=1/[\s^2^(Fo^2^)+(0.0609P)^2^+71.5194P] where P=(Fo^2^+2Fc^2^)/3'
_refine_ls_hydrogen_treatment           constr
_refine_ls_extinction_method            none
_refine_ls_number_reflns                15885
_refine_ls_number_parameters            977
_refine_ls_number_restraints            43
_refine_ls_R_factor_all                 0.0679
_refine_ls_R_factor_gt                  0.0602
_refine_ls_wR_factor_ref                0.157
_refine_ls_wR_factor_gt                 0.1528
_refine_ls_goodness_of_fit_ref          1.054
_refine_ls_restrained_S_all             1.06
_refine_ls_shift/su_max                 0.048
_refine_ls_shift/su_mean                0.001
_refine_diff_density_max                2.696
_refine_diff_density_min                -0.875
_refine_diff_density_rms                0.131
 
#----------------------------------------------------------------------------#
#                   ATOMIC TYPES, COORDINATES AND THERMAL PARAMETERS         #
#----------------------------------------------------------------------------#
 
loop_
    _atom_type_symbol
    _atom_type_description
    _atom_type_scat_dispersion_real
    _atom_type_scat_dispersion_imag
    _atom_type_scat_source
C C 0.0181 0.0091 'International Tables Vol C Tables 4.2.6.8 and 6.1.1.4'
H H 0 0 'International Tables Vol C Tables 4.2.6.8 and 6.1.1.4'
N N 0.0311 0.018 'International Tables Vol C Tables 4.2.6.8 and 6.1.1.4'
O O 0.0492 0.0322 'International Tables Vol C Tables 4.2.6.8 and 6.1.1.4'
Br Br -0.6763 1.2805 'International Tables Vol C Tables 4.2.6.8 and 6.1.1.4'
Ag Ag 0.1306 4.282 'International Tables Vol C Tables 4.2.6.8 and 6.1.1.4'
 
loop_
    _atom_site_label
    _atom_site_type_symbol
    _atom_site_fract_x
    _atom_site_fract_y
    _atom_site_fract_z
    _atom_site_U_iso_or_equiv
    _atom_site_adp_type
    _atom_site_occupancy
    _atom_site_symmetry_multiplicity
    _atom_site_calc_flag
    _atom_site_refinement_flags
    _atom_site_disorder_assembly
    _atom_site_disorder_group
Ag0 Ag 0.79129(4) 0.347775(19) 0.50871(4) 0.05431(17) Uani 1 1 d . . .
Ag1 Ag 0.98872(3) 0.334266(14) 0.48409(3) 0.04000(14) Uani 1 1 d . . .
Ag2 Ag 0.59925(4) 0.399288(16) 0.47734(4) 0.04651(15) Uani 1 1 d . . .
Ag3 Ag 0.59202(3) 0.313197(16) 0.49016(3) 0.04399(14) Uani 1 1 d . . .
Br1 Br 0.63731(5) 0.35225(2) 0.61061(5) 0.0481(2) Uani 1 1 d . . .
Br2 Br 0.70405(5) 0.37285(2) 0.37269(5) 0.04327(18) Uani 1 1 d . . .
Br3 Br 0.76582(5) 0.27497(2) 0.49204(5) 0.04430(19) Uani 1 1 d . . .
Br4 Br 0.90456(6) 0.39834(2) 0.56079(6) 0.0551(2) Uani 1 1 d . . .
C1 C 0.9399(6) 0.4061(2) 0.3408(5) 0.053(2) Uani 1 1 d . . .
H1A H 0.9388 0.407 0.3977 0.08 Uiso 1 1 calc R . .
H1B H 0.8865 0.4192 0.3185 0.08 Uiso 1 1 calc R . .
H1C H 0.9956 0.4181 0.3233 0.08 Uiso 1 1 calc R . .
N21 N 0.9381(4) 0.36719(17) 0.3151(4) 0.0460(15) Uani 1 1 d . . .
C22 C 0.9533(5) 0.33828(19) 0.3654(4) 0.0393(16) Uani 1 1 d . . .
N23 N 0.9437(4) 0.30692(16) 0.3189(4) 0.0388(13) Uani 1 1 d . . .
C23A C 0.9234(5) 0.3161(2) 0.2426(5) 0.0460(18) Uani 1 1 d . . .
C24 C 0.9070(5) 0.2944(2) 0.1744(5) 0.0484(19) Uani 1 1 d . . .
O24 O 0.9138(4) 0.25714(15) 0.1818(3) 0.0478(12) Uani 1 1 d . . .
C241 C 0.8799(6) 0.2344(3) 0.1183(5) 0.053(2) Uani 1 1 d . . .
H24A H 0.9159 0.239 0.0714 0.064 Uiso 1 1 calc R . .
H24B H 0.8153 0.2406 0.1056 0.064 Uiso 1 1 calc R . .
C242 C 0.8883(5) 0.1948(2) 0.1427(5) 0.052(2) Uani 1 1 d . . .
H24C H 0.8569 0.1914 0.1923 0.062 Uiso 1 1 calc R . .
H24D H 0.9536 0.1889 0.1523 0.062 Uiso 1 1 calc R . .
C243 C 0.8483(6) 0.1679(3) 0.0827(6) 0.073(3) Uani 1 1 d . . .
H24E H 0.7824 0.1732 0.0749 0.088 Uiso 1 1 calc R . .
H24F H 0.8777 0.1723 0.0325 0.088 Uiso 1 1 calc R . .
C244 C 0.8599(7) 0.1282(3) 0.1045(9) 0.102(5) Uani 1 1 d . . .
H24G H 0.925 0.1222 0.1087 0.154 Uiso 1 1 calc R . .
H24H H 0.8303 0.1124 0.0644 0.154 Uiso 1 1 calc R . .
H24I H 0.8319 0.1237 0.1546 0.154 Uiso 1 1 calc R . .
C25 C 0.8863(7) 0.3134(3) 0.1065(5) 0.063(2) Uani 1 1 d . . .
H25 H 0.873 0.2997 0.0602 0.076 Uiso 1 1 calc R . .
C26 C 0.8846(9) 0.3533(3) 0.1040(6) 0.079(3) Uani 1 1 d . . .
H26 H 0.8735 0.3655 0.0556 0.095 Uiso 1 1 calc R . .
C27 C 0.8985(7) 0.3739(3) 0.1696(6) 0.065(2) Uani 1 1 d . . .
O27 O 0.8978(6) 0.41247(19) 0.1732(4) 0.085(2) Uani 1 1 d . . .
C271 C 0.8757(10) 0.4322(3) 0.1020(7) 0.090(4) Uani 1 1 d . . .
H27A H 0.8144 0.4248 0.0815 0.108 Uiso 1 1 calc R . .
H27B H 0.9208 0.4264 0.0622 0.108 Uiso 1 1 calc R . .
C272 C 0.8778(9) 0.4736(3) 0.1215(8) 0.089(4) Uani 1 1 d . A .
H27C H 0.8574 0.488 0.075 0.107 Uiso 1 1 calc R . .
H27D H 0.8345 0.4786 0.1632 0.107 Uiso 1 1 calc R . .
C273 C 0.9678(10) 0.4863(4) 0.1468(10) 0.108(4) Uani 1 1 d D . .
H27E H 0.9942 0.4694 0.1871 0.13 Uiso 0.631(7) 1 calc PR A 1
H27F H 0.9645 0.5118 0.1689 0.13 Uiso 0.631(7) 1 calc PR A 1
H27J H 1.0086 0.4879 0.1022 0.13 Uiso 0.369(7) 1 d PR A 2
H27K H 0.9952 0.4691 0.1861 0.13 Uiso 0.369(7) 1 d PR A 2
C274 C 1.029(2) 0.4862(11) 0.0703(17) 0.179(12) Uiso 0.631(7) 1 d PD A 1
H27G H 1.0452 0.4604 0.057 0.269 Uiso 0.631(7) 1 calc PR A 1
H27H H 1.0855 0.5005 0.081 0.269 Uiso 0.631(7) 1 calc PR A 1
H27I H 0.9951 0.4976 0.0266 0.269 Uiso 0.631(7) 1 calc PR A 1
C275 C 0.952(4) 0.5273(12) 0.184(3) 0.179(12) Uiso 0.369(7) 1 d PD A 2
H27L H 0.9307 0.5446 0.1431 0.269 Uiso 0.369(7) 1 calc PR A 2
H27M H 1.0089 0.5364 0.208 0.269 Uiso 0.369(7) 1 calc PR A 2
H27N H 0.9053 0.5256 0.2238 0.269 Uiso 0.369(7) 1 calc PR A 2
C27A C 0.9189(6) 0.3551(2) 0.2397(5) 0.051(2) Uani 1 1 d . . .
C2 C 0.9507(5) 0.26885(19) 0.3525(4) 0.0399(16) Uani 1 1 d . . .
H2A H 0.9223 0.2509 0.3152 0.048 Uiso 1 1 calc R . .
H2B H 0.9159 0.268 0.4008 0.048 Uiso 1 1 calc R . .
C31 C 1.0810(5) 0.24490(18) 0.4440(5) 0.0394(16) Uani 1 1 d . . .
C32 C 1.0488(4) 0.25666(18) 0.3712(4) 0.0367(15) Uani 1 1 d . . .
C33 C 1.1076(5) 0.2560(2) 0.3087(5) 0.0454(17) Uani 1 1 d . . .
H33 H 1.086 0.2639 0.2586 0.054 Uiso 1 1 calc R . .
C34 C 1.1967(5) 0.2440(2) 0.3192(5) 0.051(2) Uani 1 1 d . . .
H34 H 1.2365 0.2441 0.2767 0.061 Uiso 1 1 calc R . .
C35 C 1.2276(5) 0.2319(2) 0.3910(6) 0.054(2) Uani 1 1 d . . .
H35 H 1.2885 0.2232 0.3981 0.064 Uiso 1 1 calc R . .
C36 C 1.1710(5) 0.23248(19) 0.4526(5) 0.0449(18) Uani 1 1 d . . .
H36 H 1.1933 0.2242 0.5022 0.054 Uiso 1 1 calc R . .
C3 C 1.0250(5) 0.24442(19) 0.5159(4) 0.0412(16) Uani 1 1 d . . .
H3A H 0.9627 0.2535 0.5024 0.049 Uiso 1 1 calc R . .
H3B H 1.0199 0.2184 0.5348 0.049 Uiso 1 1 calc R . .
N41 N 1.0655(4) 0.26792(16) 0.5785(4) 0.0402(13) Uani 1 1 d . . .
C42 C 1.0588(5) 0.30602(19) 0.5765(4) 0.0381(16) Uani 1 1 d . . .
N43 N 1.1025(4) 0.31803(16) 0.6413(4) 0.0401(13) Uani 1 1 d . . .
C43A C 1.1375(5) 0.2887(2) 0.6864(4) 0.0407(16) Uani 1 1 d . . .
C44 C 1.1862(5) 0.2876(2) 0.7573(5) 0.0457(18) Uani 1 1 d . . .
O44 O 1.2061(4) 0.32128(16) 0.7924(3) 0.0546(14) Uani 1 1 d . . .
C441 C 1.2647(7) 0.3206(3) 0.8608(5) 0.063(2) Uani 1 1 d . . .
H44A H 1.3246 0.3097 0.8488 0.075 Uiso 1 1 calc R . .
H44B H 1.2372 0.3053 0.902 0.075 Uiso 1 1 calc R . .
C442 C 1.2759(12) 0.3602(4) 0.8873(7) 0.111(6) Uani 1 1 d D A .
H44C H 1.3001 0.3753 0.8444 0.133 Uiso 1 1 calc R . .
H44D H 1.3207 0.3611 0.9316 0.133 Uiso 1 1 calc R . .
C443 C 1.1805(16) 0.3779(4) 0.9137(10) 0.149(8) Uani 1 1 d D . .
H44E H 1.1379 0.3763 0.8679 0.179 Uiso 0.631(7) 1 calc PR A 1
H44F H 1.1565 0.3608 0.9535 0.179 Uiso 0.631(7) 1 calc PR A 1
H44J H 1.1514 0.3628 0.9543 0.179 Uiso 0.369(7) 1 d PR A 2
H44K H 1.137 0.3819 0.8691 0.179 Uiso 0.369(7) 1 d PR A 2
C444 C 1.172(2) 0.4160(7) 0.9449(19) 0.142(9) Uiso 0.631(7) 1 d PD A 1
H44G H 1.1077 0.4208 0.9568 0.213 Uiso 0.631(7) 1 calc PR A 1
H44H H 1.1913 0.4341 0.9062 0.213 Uiso 0.631(7) 1 calc PR A 1
H44I H 1.2098 0.4185 0.9926 0.213 Uiso 0.631(7) 1 calc PR A 1
C445 C 1.222(3) 0.4167(10) 0.948(3) 0.142(9) Uiso 0.369(7) 1 d PD A 2
H44L H 1.1724 0.432 0.9674 0.213 Uiso 0.369(7) 1 calc PR A 2
H44M H 1.2519 0.4301 0.906 0.213 Uiso 0.369(7) 1 calc PR A 2
H44N H 1.2664 0.4113 0.99 0.213 Uiso 0.369(7) 1 calc PR A 2
C45 C 1.2088(5) 0.2531(2) 0.7865(5) 0.0469(18) Uani 1 1 d . . .
H45 H 1.2417 0.2514 0.8349 0.056 Uiso 1 1 calc R . .
C46 C 1.1845(5) 0.2203(2) 0.7464(5) 0.0462(18) Uani 1 1 d . . .
H46 H 1.2011 0.1968 0.7687 0.055 Uiso 1 1 calc R . .
C47 C 1.1376(5) 0.2210(2) 0.6764(4) 0.0418(16) Uani 1 1 d . . .
O47 O 1.1128(4) 0.19022(14) 0.6321(3) 0.0504(13) Uani 1 1 d . . .
C471 C 1.1408(7) 0.1546(2) 0.6630(5) 0.059(2) Uani 1 1 d D A .
H47A H 1.1088 0.1491 0.7116 0.071 Uiso 1 1 calc R . .
H47B H 1.2073 0.1544 0.6747 0.071 Uiso 1 1 calc R . .
C472 C 1.1155(9) 0.1252(3) 0.5996(8) 0.086(3) Uani 1 1 d D . .
H47C H 1.1378 0.1339 0.549 0.103 Uiso 0.631(7) 1 calc PR A 1
H47D H 1.1468 0.1014 0.6127 0.103 Uiso 0.631(7) 1 calc PR A 1
H47J H 1.1266 0.1002 0.6227 0.103 Uiso 0.369(7) 1 d PR A 2
H47K H 1.049 0.1272 0.5885 0.103 Uiso 0.369(7) 1 d PR A 2
C473 C 1.0196(15) 0.1186(5) 0.5921(15) 0.123(9) Uani 0.631(7) 1 d PD A 1
H47E H 0.9863 0.142 0.5799 0.148 Uiso 0.631(7) 1 calc PR A 1
H47F H 0.9962 0.1079 0.6406 0.148 Uiso 0.631(7) 1 calc PR A 1
C474 C 1.009(2) 0.0904(7) 0.5238(15) 0.156(14) Uani 0.631(7) 1 d PD A 1
H47G H 1.0449 0.0989 0.48 0.233 Uiso 0.631(7) 1 calc PR A 1
H47H H 0.9446 0.0886 0.5072 0.233 Uiso 0.631(7) 1 calc PR A 1
H47I H 1.031 0.0658 0.541 0.233 Uiso 0.631(7) 1 calc PR A 1
C475 C 1.159(2) 0.1261(9) 0.5269(15) 0.090(9) Uiso 0.369(7) 1 d PD A 2
H47L H 1.2258 0.1278 0.5367 0.108 Uiso 0.369(7) 1 calc PR A 2
H47M H 1.1394 0.1488 0.4982 0.108 Uiso 0.369(7) 1 calc PR A 2
C476 C 1.138(3) 0.0912(9) 0.4750(17) 0.096(10) Uiso 0.369(7) 1 d PD A 2
H47N H 1.1447 0.0685 0.5065 0.144 Uiso 0.369(7) 1 calc PR A 2
H47O H 1.18 0.0904 0.4321 0.144 Uiso 0.369(7) 1 calc PR A 2
H47P H 1.0749 0.0928 0.4538 0.144 Uiso 0.369(7) 1 calc PR A 2
C47A C 1.1137(5) 0.2563(2) 0.6453(4) 0.0407(16) Uani 1 1 d . . .
C4 C 1.1139(6) 0.3578(2) 0.6598(5) 0.0499(19) Uani 1 1 d . . .
H4A H 1.1776 0.3651 0.6534 0.075 Uiso 1 1 calc R . .
H4B H 1.0971 0.3623 0.7137 0.075 Uiso 1 1 calc R . .
H4C H 1.0744 0.3727 0.6246 0.075 Uiso 1 1 calc R . .
C5 C 0.5205(6) 0.4493(2) 0.6350(5) 0.056(2) Uani 1 1 d . . .
H5A H 0.4779 0.4401 0.6734 0.085 Uiso 1 1 calc R . .
H5B H 0.5475 0.4729 0.6533 0.085 Uiso 1 1 calc R . .
H5C H 0.5688 0.4308 0.6282 0.085 Uiso 1 1 calc R . .
N61 N 0.4720(4) 0.45530(16) 0.5614(4) 0.0431(14) Uani 1 1 d . . .
C62 C 0.4874(5) 0.43637(18) 0.4958(5) 0.0399(17) Uani 1 1 d . . .
N63 N 0.4276(4) 0.44948(16) 0.4409(4) 0.0401(13) Uani 1 1 d . . .
C63A C 0.3727(5) 0.47714(19) 0.4725(5) 0.0441(18) Uani 1 1 d . . .
C64 C 0.3048(5) 0.5008(2) 0.4376(6) 0.052(2) Uani 1 1 d . . .
O64 O 0.2867(4) 0.49721(17) 0.3603(4) 0.0658(17) Uani 1 1 d . . .
C641 C 0.2226(8) 0.5236(3) 0.3241(7) 0.087(3) Uani 1 1 d D A .
H64A H 0.2422 0.5495 0.3351 0.104 Uiso 1 1 calc R . .
H64B H 0.1608 0.5199 0.3443 0.104 Uiso 1 1 calc R . .
C642 C 0.2223(12) 0.5161(5) 0.2391(8) 0.142(7) Uani 1 1 d D . .
H64C H 0.194 0.4913 0.2306 0.171 Uiso 0.631(7) 1 calc PR A 1
H64D H 0.181 0.5346 0.2137 0.171 Uiso 0.631(7) 1 calc PR A 1
H64J H 0.1713 0.5317 0.2185 0.171 Uiso 0.369(7) 1 d PR A 2
H64K H 0.2783 0.5289 0.2224 0.171 Uiso 0.369(7) 1 d PR A 2
C643 C 0.3066(14) 0.5164(6) 0.1969(11) 0.095(6) Uiso 0.631(7) 1 d PD A 1
H64E H 0.3481 0.4976 0.2211 0.113 Uiso 0.631(7) 1 calc PR A 1
H64F H 0.3357 0.5411 0.205 0.113 Uiso 0.631(7) 1 calc PR A 1
C644 C 0.301(2) 0.5091(9) 0.1117(13) 0.137(10) Uiso 0.631(7) 1 d PD A 1
H64N H 0.259 0.5269 0.0864 0.206 Uiso 0.631(7) 1 calc PR A 1
H64O H 0.2794 0.4836 0.1022 0.206 Uiso 0.631(7) 1 calc PR A 1
H64P H 0.362 0.512 0.0902 0.206 Uiso 0.631(7) 1 calc PR A 1
C645 C 0.218(4) 0.4866(12) 0.194(2) 0.17(2) Uiso 0.369(7) 1 d PD A 2
H64L H 0.1566 0.4755 0.1978 0.201 Uiso 0.369(7) 1 calc PR A 2
H64M H 0.2626 0.4681 0.215 0.201 Uiso 0.369(7) 1 calc PR A 2
C646 C 0.237(3) 0.4932(13) 0.1071(18) 0.130(15) Uiso 0.369(7) 1 d PD A 2
H64G H 0.2031 0.4748 0.0753 0.196 Uiso 0.369(7) 1 calc PR A 2
H64H H 0.3024 0.4905 0.0987 0.196 Uiso 0.369(7) 1 calc PR A 2
H64I H 0.2172 0.5184 0.092 0.196 Uiso 0.369(7) 1 calc PR A 2
C65 C 0.2645(5) 0.5257(2) 0.4882(6) 0.056(2) Uani 1 1 d . . .
H65 H 0.2178 0.5418 0.4683 0.067 Uiso 1 1 calc R . .
C66 C 0.2897(6) 0.5279(2) 0.5664(6) 0.060(2) Uani 1 1 d . . .
H66 H 0.259 0.5451 0.5984 0.072 Uiso 1 1 calc R . .
C67 C 0.3582(6) 0.5059(2) 0.5995(6) 0.054(2) Uani 1 1 d . . .
O67 O 0.3920(5) 0.50720(17) 0.6737(4) 0.0689(18) Uani 1 1 d . . .
C671 C 0.3406(8) 0.5285(3) 0.7284(6) 0.075(3) Uani 1 1 d D A .
H67A H 0.2754 0.5213 0.7249 0.09 Uiso 1 1 calc R . .
H67B H 0.3454 0.5555 0.7172 0.09 Uiso 1 1 calc R . .
C672 C 0.3798(9) 0.5201(4) 0.8071(7) 0.104(4) Uani 1 1 d D . .
H67C H 0.3521 0.5369 0.8454 0.124 Uiso 0.631(7) 1 calc PR A 1
H67D H 0.4462 0.5251 0.8078 0.124 Uiso 0.631(7) 1 calc PR A 1
H67J H 0.3463 0.535 0.8453 0.124 Uiso 0.369(7) 1 d PR A 2
H67K H 0.3682 0.4934 0.8184 0.124 Uiso 0.369(7) 1 d PR A 2
C673 C 0.3644(16) 0.4804(6) 0.8310(11) 0.098(6) Uiso 0.631(7) 1 d PD A 1
H67E H 0.2983 0.4747 0.8281 0.118 Uiso 0.631(7) 1 calc PR A 1
H67F H 0.3955 0.4633 0.7951 0.118 Uiso 0.631(7) 1 calc PR A 1
C674 C 0.401(2) 0.4744(9) 0.9119(15) 0.159(12) Uiso 0.631(7) 1 d PD A 1
H67G H 0.4635 0.4836 0.9166 0.239 Uiso 0.631(7) 1 calc PR A 1
H67H H 0.3995 0.4477 0.9242 0.239 Uiso 0.631(7) 1 calc PR A 1
H67I H 0.3627 0.488 0.9484 0.239 Uiso 0.631(7) 1 calc PR A 1
C675 C 0.4770(18) 0.5271(10) 0.8201(18) 0.093(10) Uiso 0.369(7) 1 d PD A 2
H67L H 0.4879 0.5542 0.8136 0.111 Uiso 0.369(7) 1 calc PR A 2
H67M H 0.5103 0.514 0.779 0.111 Uiso 0.369(7) 1 calc PR A 2
C676 C 0.518(3) 0.5156(14) 0.897(2) 0.135(16) Uiso 0.369(7) 1 d PD A 2
H67N H 0.4731 0.5008 0.9252 0.203 Uiso 0.369(7) 1 calc PR A 2
H67O H 0.5338 0.5379 0.9278 0.203 Uiso 0.369(7) 1 calc PR A 2
H67P H 0.5724 0.5006 0.8894 0.203 Uiso 0.369(7) 1 calc PR A 2
C67A C 0.4004(5) 0.48043(18) 0.5481(5) 0.0462(19) Uani 1 1 d . . .
C6 C 0.4110(5) 0.4301(2) 0.3656(5) 0.0457(17) Uani 1 1 d . . .
H6A H 0.4689 0.4194 0.3477 0.055 Uiso 1 1 calc R . .
H6B H 0.3884 0.4482 0.326 0.055 Uiso 1 1 calc R . .
C71 C 0.3638(5) 0.3611(2) 0.3646(4) 0.0420(17) Uani 1 1 d . . .
C72 C 0.3409(5) 0.3991(2) 0.3747(5) 0.0479(19) Uani 1 1 d . . .
C73 C 0.2528(6) 0.4080(2) 0.3949(6) 0.065(3) Uani 1 1 d . . .
H73 H 0.2364 0.4335 0.4002 0.078 Uiso 1 1 calc R . .
C74 C 0.1886(6) 0.3808(3) 0.4073(7) 0.077(3) Uani 1 1 d . . .
H74 H 0.1285 0.3876 0.4206 0.093 Uiso 1 1 calc R . .
C75 C 0.2110(5) 0.3443(3) 0.4006(6) 0.065(3) Uani 1 1 d . . .
H75 H 0.1673 0.3255 0.4111 0.078 Uiso 1 1 calc R . .
C76 C 0.2975(5) 0.3342(2) 0.3785(5) 0.0470(19) Uani 1 1 d . . .
H76 H 0.3119 0.3086 0.3727 0.056 Uiso 1 1 calc R . .
C7 C 0.4577(5) 0.3502(2) 0.3395(5) 0.0413(16) Uani 1 1 d . . .
H7A H 0.4674 0.3605 0.2869 0.05 Uiso 1 1 calc R . .
H7B H 0.5037 0.3615 0.3757 0.05 Uiso 1 1 calc R . .
N81 N 0.4719(4) 0.30989(18) 0.3376(4) 0.0433(14) Uani 1 1 d . . .
C82 C 0.5114(4) 0.2906(2) 0.3967(4) 0.0389(16) Uani 1 1 d . . .
N83 N 0.4998(4) 0.25376(17) 0.3763(4) 0.0433(14) Uani 1 1 d . . .
C83A C 0.4550(5) 0.2508(2) 0.3042(5) 0.050(2) Uani 1 1 d . . .
C84 C 0.4254(5) 0.2190(2) 0.2588(5) 0.053(2) Uani 1 1 d . . .
O84 O 0.4418(4) 0.18495(18) 0.2907(4) 0.0632(16) Uani 1 1 d . . .
C841 C 0.3969(7) 0.1540(3) 0.2496(6) 0.072(3) Uani 1 1 d . . .
H84A H 0.4209 0.1516 0.1966 0.087 Uiso 1 1 calc R . .
H84B H 0.3304 0.1586 0.2447 0.087 Uiso 1 1 calc R . .
C842 C 0.4154(8) 0.1198(3) 0.2946(6) 0.077(3) Uani 1 1 d . A .
H84C H 0.4823 0.1163 0.3 0.093 Uiso 1 1 calc R . .
H84D H 0.3902 0.0982 0.2648 0.093 Uiso 1 1 calc R . .
C843 C 0.3763(9) 0.1195(3) 0.3747(8) 0.093(4) Uani 1 1 d . . .
H84E H 0.3954 0.0959 0.4006 0.112 Uiso 0.631(7) 1 calc PR A 1
H84F H 0.405 0.1402 0.4049 0.112 Uiso 0.631(7) 1 calc PR A 1
H84J H 0.4062 0.1391 0.4071 0.112 Uiso 0.369(7) 1 d PR A 2
H84K H 0.3102 0.1252 0.3705 0.112 Uiso 0.369(7) 1 d PR A 2
C844 C 0.2752(12) 0.1229(5) 0.3811(11) 0.080(5) Uiso 0.631(7) 1 d P A 1
H84G H 0.2568 0.1489 0.3712 0.12 Uiso 0.631(7) 1 calc PR A 1
H84H H 0.2579 0.1157 0.4336 0.12 Uiso 0.631(7) 1 calc PR A 1
H84I H 0.2446 0.1066 0.3427 0.12 Uiso 0.631(7) 1 calc PR A 1
C845 C 0.389(3) 0.0859(12) 0.409(2) 0.112(12) Uiso 0.369(7) 1 d P A 2
H84L H 0.4542 0.0808 0.4157 0.168 Uiso 0.369(7) 1 calc PR A 2
H84M H 0.3598 0.0665 0.377 0.168 Uiso 0.369(7) 1 calc PR A 2
H84N H 0.3612 0.0862 0.4606 0.168 Uiso 0.369(7) 1 calc PR A 2
C85 C 0.3834(6) 0.2271(3) 0.1891(5) 0.063(3) Uani 1 1 d . . .
H85 H 0.365 0.2069 0.1565 0.075 Uiso 1 1 calc R . .
C86 C 0.3657(6) 0.2630(3) 0.1627(6) 0.070(3) Uani 1 1 d D . .
H86 H 0.3363 0.2665 0.1131 0.084 Uiso 1 1 calc R . .
C87 C 0.3901(6) 0.2940(3) 0.2074(5) 0.062(2) Uani 1 1 d D . .
O87 O 0.3741(5) 0.3294(2) 0.1875(4) 0.084(2) Uani 1 1 d D A .
C871 C 0.3184(11) 0.3358(5) 0.1189(7) 0.121(6) Uani 1 1 d D . .
H87A H 0.3475 0.3565 0.0906 0.146 Uiso 0.631(7) 1 calc PR A 1
H87B H 0.3241 0.3133 0.0861 0.146 Uiso 0.631(7) 1 calc PR A 1
H87J H 0.339 0.32 0.0757 0.146 Uiso 0.369(7) 1 d PR A 2
H87K H 0.3227 0.3623 0.1029 0.146 Uiso 0.369(7) 1 d PR A 2
C872 C 0.2296(17) 0.3438(9) 0.120(2) 0.170(12) Uiso 0.631(7) 1 d PD A 1
H87C H 0.1955 0.3234 0.1448 0.203 Uiso 0.631(7) 1 calc PR A 1
H87D H 0.2042 0.3475 0.0663 0.203 Uiso 0.631(7) 1 calc PR A 1
C873 C 0.224(2) 0.3813(10) 0.169(2) 0.184(16) Uiso 0.631(7) 1 d PD A 1
H87E H 0.2531 0.3781 0.2217 0.221 Uiso 0.631(7) 1 calc PR A 1
H87F H 0.2546 0.4022 0.1424 0.221 Uiso 0.631(7) 1 calc PR A 1
C874 C 0.128(2) 0.3879(9) 0.174(2) 0.154(11) Uiso 0.631(7) 1 d PD A 1
H87G H 0.1181 0.4117 0.2002 0.231 Uiso 0.631(7) 1 calc PR A 1
H87H H 0.1005 0.3676 0.2031 0.231 Uiso 0.631(7) 1 calc PR A 1
H87I H 0.1005 0.3888 0.1211 0.231 Uiso 0.631(7) 1 calc PR A 1
C875 C 0.215(2) 0.3256(13) 0.139(3) 0.170(12) Uiso 0.369(7) 1 d PD A 2
H87L H 0.1782 0.3254 0.0897 0.203 Uiso 0.369(7) 1 calc PR A 2
H87M H 0.2145 0.3 0.1606 0.203 Uiso 0.369(7) 1 calc PR A 2
C876 C 0.1701(16) 0.3522(6) 0.1966(13) 0.054(6) Uiso 0.369(7) 1 d PD A 2
H87N H 0.1062 0.3441 0.2025 0.065 Uiso 0.369(7) 1 calc PR A 2
H87O H 0.202 0.3496 0.2481 0.065 Uiso 0.369(7) 1 calc PR A 2
C877 C 0.170(5) 0.3926(10) 0.174(4) 0.154(11) Uiso 0.369(7) 1 d PD A 2
H87P H 0.1395 0.4073 0.2132 0.231 Uiso 0.369(7) 1 calc PR A 2
H87Q H 0.138 0.3957 0.1233 0.231 Uiso 0.369(7) 1 calc PR A 2
H87R H 0.2333 0.4013 0.1699 0.231 Uiso 0.369(7) 1 calc PR A 2
C87A C 0.4373(6) 0.2865(2) 0.2781(5) 0.0499(19) Uiso 1 1 d . . .
C8 C 0.5345(5) 0.2235(2) 0.4234(5) 0.053(2) Uani 1 1 d . . .
H8A H 0.5755 0.2333 0.4647 0.079 Uiso 1 1 calc R . .
H8B H 0.568 0.2061 0.3909 0.079 Uiso 1 1 calc R . .
H8C H 0.4836 0.2103 0.4468 0.079 Uiso 1 1 calc R . .
N101 N 0.016(2) 0.0899(7) 0.3131(12) 0.149(10) Uani 0.631(7) 1 d P A 1
C101 C 0.0281(15) 0.1210(6) 0.3116(12) 0.092(6) Uani 0.631(7) 1 d P A 1
C102 C 0.0537(11) 0.1586(4) 0.3132(8) 0.099(4) Uani 0.631(7) 1 d P A 1
H10A H 0.0928 0.1633 0.3595 0.149 Uiso 0.631(7) 1 calc PR A 1
H10B H -0.0009 0.1742 0.3149 0.149 Uiso 0.631(7) 1 calc PR A 1
H10C H 0.0872 0.1645 0.2663 0.149 Uiso 0.631(7) 1 calc PR A 1
N201 N -0.036(2) 0.1594(10) 0.4277(18) 0.103(9) Uani 0.369(7) 1 d P A 2
C201 C 0.013(2) 0.1583(7) 0.3755(15) 0.063(7) Uani 0.369(7) 1 d P A 2
C202 C 0.0537(11) 0.1586(4) 0.3132(8) 0.099(4) Uani 0.369(7) 1 d P A 2
H20A H 0.0094 0.1601 0.2693 0.149 Uiso 0.369(7) 1 calc PR A 2
H20B H 0.0896 0.1356 0.309 0.149 Uiso 0.369(7) 1 calc PR A 2
H20C H 0.0945 0.1802 0.3122 0.149 Uiso 0.369(7) 1 calc PR A 2
 
loop_
    _atom_site_aniso_label
    _atom_site_aniso_U_11
    _atom_site_aniso_U_22
    _atom_site_aniso_U_33
    _atom_site_aniso_U_23
    _atom_site_aniso_U_13
    _atom_site_aniso_U_12
Ag0 0.0321(3) 0.0644(4) 0.0669(4) -0.0082(3) 0.0092(3) -0.0018(3)
Ag1 0.0304(3) 0.0339(3) 0.0561(3) 0.0017(2) 0.0078(2) -0.00010(19)
Ag2 0.0315(3) 0.0446(3) 0.0639(4) -0.0152(2) 0.0082(2) 0.0011(2)
Ag3 0.0302(3) 0.0498(3) 0.0522(3) 0.0004(2) 0.0053(2) -0.0002(2)
Br1 0.0375(4) 0.0615(5) 0.0457(4) -0.0058(4) 0.0079(3) 0.0078(3)
Br2 0.0339(4) 0.0425(4) 0.0541(5) -0.0083(3) 0.0120(3) 0.0005(3)
Br3 0.0300(4) 0.0542(4) 0.0490(4) -0.0006(3) 0.0053(3) 0.0086(3)
Br4 0.0416(4) 0.0486(5) 0.0753(6) -0.0174(4) 0.0027(4) 0.0089(3)
C1 0.050(5) 0.044(4) 0.067(5) 0.011(4) 0.021(4) 0.006(4)
N21 0.037(3) 0.039(3) 0.063(4) 0.005(3) 0.020(3) 0.005(3)
C22 0.029(3) 0.037(4) 0.052(4) 0.004(3) 0.013(3) 0.004(3)
N23 0.027(3) 0.039(3) 0.051(4) 0.003(3) 0.010(2) 0.003(2)
C23A 0.038(4) 0.044(4) 0.057(5) 0.005(3) 0.014(3) 0.007(3)
C24 0.043(4) 0.054(5) 0.050(5) 0.005(4) 0.020(3) 0.010(3)
O24 0.044(3) 0.050(3) 0.050(3) -0.005(2) 0.008(2) 0.010(2)
C241 0.041(4) 0.077(6) 0.043(4) -0.005(4) 0.009(3) 0.011(4)
C242 0.030(4) 0.069(5) 0.057(5) -0.024(4) 0.013(3) 0.011(4)
C243 0.034(4) 0.106(8) 0.079(7) -0.044(6) 0.017(4) -0.002(5)
C244 0.040(5) 0.072(7) 0.195(14) -0.063(8) 0.012(7) 0.007(5)
C25 0.075(6) 0.063(6) 0.053(5) -0.005(4) 0.023(4) 0.012(5)
C26 0.107(9) 0.074(7) 0.057(6) 0.016(5) 0.036(6) 0.020(6)
C27 0.081(7) 0.053(5) 0.061(6) 0.011(4) 0.027(5) 0.014(5)
O27 0.133(7) 0.053(4) 0.071(4) 0.020(3) 0.034(4) 0.012(4)
C271 0.110(10) 0.073(7) 0.089(8) 0.023(6) 0.032(7) 0.013(7)
C272 0.083(8) 0.076(7) 0.111(9) 0.031(7) 0.023(7) 0.009(6)
C273 0.097(10) 0.087(9) 0.140(13) 0.018(9) -0.006(9) 0.010(8)
C27A 0.046(4) 0.047(4) 0.061(5) 0.012(4) 0.028(4) 0.006(3)
C2 0.032(4) 0.036(4) 0.052(4) -0.002(3) 0.008(3) -0.001(3)
C31 0.035(4) 0.025(3) 0.058(5) -0.003(3) 0.006(3) -0.003(3)
C32 0.027(3) 0.027(3) 0.056(4) -0.005(3) 0.010(3) -0.003(3)
C33 0.041(4) 0.037(4) 0.059(5) -0.005(3) 0.012(3) 0.004(3)
C34 0.037(4) 0.045(4) 0.071(6) -0.015(4) 0.012(4) 0.005(3)
C35 0.029(4) 0.042(4) 0.090(7) -0.014(4) 0.000(4) 0.008(3)
C36 0.034(4) 0.031(4) 0.070(5) -0.006(3) 0.002(3) 0.005(3)
C3 0.037(4) 0.029(3) 0.058(5) 0.005(3) 0.005(3) -0.001(3)
N41 0.035(3) 0.036(3) 0.050(4) 0.004(3) 0.005(3) -0.001(2)
C42 0.028(3) 0.033(3) 0.054(4) 0.005(3) 0.013(3) 0.000(3)
N43 0.032(3) 0.036(3) 0.053(4) -0.002(3) 0.010(3) -0.003(2)
C43A 0.029(3) 0.043(4) 0.051(4) 0.002(3) 0.012(3) -0.002(3)
C44 0.034(4) 0.050(4) 0.054(5) -0.003(4) 0.015(3) -0.007(3)
O44 0.058(3) 0.057(3) 0.049(3) -0.005(3) 0.005(3) -0.008(3)
C441 0.057(5) 0.077(6) 0.054(5) -0.003(4) 0.004(4) -0.025(5)
C442 0.183(16) 0.092(9) 0.055(7) -0.005(6) -0.018(8) -0.067(10)
C443 0.27(3) 0.074(9) 0.104(11) -0.034(8) -0.031(14) 0.015(12)
C45 0.032(4) 0.061(5) 0.048(4) 0.006(4) 0.008(3) -0.005(3)
C46 0.031(4) 0.055(5) 0.053(5) 0.004(4) 0.010(3) 0.002(3)
C47 0.031(4) 0.046(4) 0.049(4) 0.008(3) 0.012(3) -0.004(3)
O47 0.053(3) 0.038(3) 0.060(3) 0.008(2) -0.004(3) -0.001(2)
C471 0.067(6) 0.042(4) 0.067(6) 0.015(4) -0.005(4) 0.000(4)
C472 0.091(8) 0.044(5) 0.122(10) 0.010(6) 0.001(7) 0.007(5)
C473 0.12(2) 0.051(10) 0.20(3) 0.022(13) 0.040(18) 0.018(11)
C474 0.22(3) 0.101(18) 0.14(2) -0.046(17) -0.09(2) 0.012(19)
C47A 0.026(3) 0.046(4) 0.050(4) -0.001(3) 0.013(3) -0.004(3)
C4 0.047(4) 0.040(4) 0.063(5) -0.008(4) 0.004(4) -0.004(3)
C5 0.066(6) 0.039(4) 0.065(5) -0.011(4) 0.014(4) -0.005(4)
N61 0.042(3) 0.029(3) 0.059(4) -0.007(3) 0.015(3) -0.008(2)
C62 0.033(4) 0.027(3) 0.061(5) -0.007(3) 0.021(3) -0.008(3)
N63 0.031(3) 0.031(3) 0.059(4) -0.008(3) 0.011(3) -0.002(2)
C63A 0.035(4) 0.028(3) 0.071(5) -0.009(3) 0.024(4) -0.006(3)
C64 0.039(4) 0.032(4) 0.086(6) -0.004(4) 0.021(4) -0.002(3)
O64 0.056(4) 0.051(3) 0.091(5) -0.008(3) 0.001(3) 0.017(3)
C641 0.078(7) 0.074(7) 0.108(9) 0.002(6) -0.003(6) 0.037(6)
C642 0.153(15) 0.166(16) 0.106(11) 0.008(11) -0.016(10) 0.108(14)
C65 0.039(4) 0.031(4) 0.099(7) -0.002(4) 0.028(4) -0.002(3)
C66 0.051(5) 0.032(4) 0.099(8) -0.014(4) 0.037(5) -0.006(4)
C67 0.049(5) 0.039(4) 0.076(6) -0.018(4) 0.033(4) -0.017(4)
O67 0.078(4) 0.054(4) 0.077(4) -0.025(3) 0.037(4) -0.005(3)
C671 0.091(7) 0.054(5) 0.084(7) -0.025(5) 0.050(6) -0.009(5)
C672 0.106(10) 0.124(11) 0.082(9) -0.043(8) 0.028(7) 0.008(8)
C67A 0.043(4) 0.023(3) 0.074(6) -0.009(3) 0.028(4) -0.009(3)
C6 0.037(4) 0.048(4) 0.053(5) -0.007(3) 0.012(3) 0.005(3)
C71 0.031(4) 0.049(4) 0.046(4) -0.013(3) 0.005(3) 0.006(3)
C72 0.034(4) 0.046(4) 0.064(5) -0.019(4) 0.000(3) 0.009(3)
C73 0.036(4) 0.049(5) 0.110(8) -0.036(5) 0.004(4) 0.006(4)
C74 0.027(4) 0.060(6) 0.146(10) -0.043(6) 0.015(5) -0.004(4)
C75 0.023(4) 0.056(5) 0.115(8) -0.033(5) 0.012(4) -0.005(3)
C76 0.027(4) 0.044(4) 0.071(5) -0.023(4) 0.008(3) -0.001(3)
C7 0.028(3) 0.043(4) 0.054(4) -0.009(3) 0.008(3) 0.005(3)
N81 0.030(3) 0.048(4) 0.052(4) -0.015(3) 0.007(3) 0.006(3)
C82 0.024(3) 0.047(4) 0.046(4) -0.014(3) 0.004(3) 0.003(3)
N83 0.033(3) 0.046(3) 0.052(4) -0.004(3) 0.017(3) 0.007(3)
C83A 0.025(3) 0.068(5) 0.058(5) -0.015(4) 0.016(3) 0.005(3)
C84 0.036(4) 0.053(5) 0.070(6) -0.017(4) 0.021(4) 0.011(3)
O84 0.048(3) 0.062(4) 0.080(4) -0.026(3) 0.020(3) -0.002(3)
C841 0.064(6) 0.071(6) 0.083(7) -0.029(5) 0.022(5) -0.011(5)
C842 0.077(7) 0.070(7) 0.087(7) -0.021(6) 0.033(6) -0.009(5)
C843 0.095(9) 0.076(7) 0.111(9) -0.029(7) 0.043(7) -0.023(6)
C85 0.040(4) 0.089(7) 0.060(6) -0.031(5) 0.009(4) 0.007(4)
C86 0.047(5) 0.099(8) 0.064(6) -0.032(5) 0.009(4) 0.024(5)
C87 0.047(5) 0.087(7) 0.053(5) -0.027(5) 0.005(4) 0.018(5)
O87 0.097(5) 0.092(5) 0.061(4) -0.016(4) -0.014(4) 0.057(5)
C871 0.146(14) 0.143(13) 0.073(8) -0.029(8) -0.030(8) 0.066(11)
C8 0.040(4) 0.052(5) 0.068(5) 0.001(4) 0.019(4) 0.009(3)
N101 0.22(3) 0.123(17) 0.102(15) -0.047(13) 0.040(15) -0.075(18)
C101 0.107(15) 0.086(14) 0.084(13) -0.016(10) 0.014(11) -0.037(12)
C102 0.142(13) 0.077(8) 0.079(8) -0.011(6) 0.001(8) -0.004(8)
N201 0.09(2) 0.13(3) 0.09(2) 0.005(18) 0.024(16) 0.010(18)
C201 0.081(18) 0.058(15) 0.051(15) -0.009(11) 0.001(13) 0.024(13)
C202 0.142(13) 0.077(8) 0.079(8) -0.011(6) 0.001(8) -0.004(8)
 
 
#----------------------------------------------------------------------------#
#                   MOLECULAR GEOMETRY                                       #
#----------------------------------------------------------------------------#
 
_geom_special_details
;
 All s.u.'s (except the s.u. in the dihedral angle between two l.s. planes)
 are estimated using the full covariance matrix.  The cell s.u.'s are taken
 into account individually in the estimation of s.u.'s in distances, angles
 and torsion angles; correlations between s.u.'s in cell parameters are only
 used when they are defined by crystal symmetry.  An approximate (isotropic)
 treatment of cell s.u.'s is used for estimating s.u.'s involving l.s. planes.
;
loop_
    _geom_bond_atom_site_label_1
    _geom_bond_atom_site_label_2
    _geom_bond_distance
    _geom_bond_site_symmetry_2
    _geom_bond_publ_flag
Ag0 Br4 2.5962(11) . ?
Ag0 Br3 2.6484(10) . ?
Ag0 Br2 2.7755(11) . ?
Ag0 Br1 2.9080(10) . ?
Ag1 C22 2.092(8) . ?
Ag1 C42 2.120(7) . ?
Ag1 Br4 2.9386(9) . ?
Ag2 C62 2.142(7) . ?
Ag2 Br2 2.5841(9) . ?
Ag2 Br1 2.8819(11) . ?
Ag3 C82 2.121(7) . ?
Ag3 Br1 2.5666(10) . ?
Ag3 Br3 2.8929(9) . ?
C1 N21 1.462(10) . ?
C1 H1A 0.98 . ?
C1 H1B 0.98 . ?
C1 H1C 0.98 . ?
N21 C22 1.362(9) . ?
N21 C27A 1.386(11) . ?
C22 N23 1.383(9) . ?
N23 C23A 1.373(10) . ?
N23 C2 1.483(9) . ?
C23A C27A 1.401(11) . ?
C23A C24 1.419(12) . ?
C24 O24 1.345(10) . ?
C24 C25 1.376(12) . ?
O24 C241 1.435(10) . ?
C241 C242 1.483(13) . ?
C241 H24A 0.99 . ?
C241 H24B 0.99 . ?
C242 C243 1.516(12) . ?
C242 H24C 0.99 . ?
C242 H24D 0.99 . ?
C243 C244 1.478(17) . ?
C243 H24E 0.99 . ?
C243 H24F 0.99 . ?
C244 H24G 0.98 . ?
C244 H24H 0.98 . ?
C244 H24I 0.98 . ?
C25 C26 1.427(14) . ?
C25 H25 0.95 . ?
C26 C27 1.358(15) . ?
C26 H26 0.95 . ?
C27 O27 1.382(11) . ?
C27 C27A 1.402(12) . ?
O27 C271 1.439(13) . ?
C271 C272 1.522(17) . ?
C271 H27A 0.99 . ?
C271 H27B 0.99 . ?
C272 C273 1.448(18) . ?
C272 H27C 0.99 . ?
C272 H27D 0.99 . ?
C273 C274 1.62(3) . ?
C273 C275 1.62(3) . ?
C273 H27E 0.99 . ?
C273 H27F 0.99 . ?
C273 H27J 0.99 . ?
C273 H27K 0.99 . ?
C274 H27J 0.6394 . ?
C274 H27G 0.98 . ?
C274 H27H 0.98 . ?
C274 H27I 0.98 . ?
C275 H27L 0.98 . ?
C275 H27M 0.98 . ?
C275 H27N 0.98 . ?
C2 C32 1.527(10) . ?
C2 H2A 0.99 . ?
C2 H2B 0.99 . ?
C31 C32 1.388(11) . ?
C31 C36 1.396(10) . ?
C31 C3 1.506(10) . ?
C32 C33 1.399(10) . ?
C33 C34 1.382(11) . ?
C33 H33 0.95 . ?
C34 C35 1.371(13) . ?
C34 H34 0.95 . ?
C35 C36 1.366(12) . ?
C35 H35 0.95 . ?
C36 H36 0.95 . ?
C3 N41 1.475(10) . ?
C3 H3A 0.99 . ?
C3 H3B 0.99 . ?
N41 C42 1.368(9) . ?
N41 C47A 1.391(10) . ?
C42 N43 1.336(10) . ?
N43 C43A 1.394(10) . ?
N43 C4 1.469(9) . ?
C43A C44 1.392(11) . ?
C43A C47A 1.395(10) . ?
C44 C45 1.370(11) . ?
C44 O44 1.375(9) . ?
O44 C441 1.434(11) . ?
C441 C442 1.497(15) . ?
C441 H44A 0.99 . ?
C441 H44B 0.99 . ?
C442 C443 1.61(2) . ?
C442 H44C 0.99 . ?
C442 H44D 0.99 . ?
C443 C444 1.48(2) . ?
C443 C445 1.62(3) . ?
C443 H44E 0.99 . ?
C443 H44F 0.99 . ?
C443 H44J 0.99 . ?
C443 H44K 0.99 . ?
C444 H44G 0.98 . ?
C444 H44H 0.98 . ?
C444 H44I 0.98 . ?
C445 H44L 0.98 . ?
C445 H44M 0.98 . ?
C445 H44N 0.98 . ?
C45 C46 1.403(11) . ?
C45 H45 0.95 . ?
C46 C47 1.365(11) . ?
C46 H46 0.95 . ?
C47 O47 1.380(9) . ?
C47 C47A 1.415(10) . ?
O47 C471 1.438(9) . ?
C471 C472 1.549(14) . ?
C471 H47A 0.99 . ?
C471 H47B 0.99 . ?
C472 C475 1.42(2) . ?
C472 C473 1.43(2) . ?
C472 H47C 0.99 . ?
C472 H47D 0.99 . ?
C472 H47J 0.99 . ?
C472 H47K 0.99 . ?
C473 C474 1.55(2) . ?
C473 H47K 0.5347 . ?
C473 H47E 0.99 . ?
C473 H47F 0.99 . ?
C474 H47G 0.98 . ?
C474 H47H 0.98 . ?
C474 H47I 0.98 . ?
C475 C476 1.56(3) . ?
C475 H47L 0.99 . ?
C475 H47M 0.99 . ?
C476 H47N 0.98 . ?
C476 H47O 0.98 . ?
C476 H47P 0.98 . ?
C4 H4A 0.98 . ?
C4 H4B 0.98 . ?
C4 H4C 0.98 . ?
C5 N61 1.445(11) . ?
C5 H5A 0.98 . ?
C5 H5B 0.98 . ?
C5 H5C 0.98 . ?
N61 C62 1.342(9) . ?
N61 C67A 1.397(10) . ?
C62 N63 1.351(10) . ?
N63 C63A 1.397(9) . ?
N63 C6 1.480(10) . ?
C63A C67A 1.354(12) . ?
C63A C64 1.424(12) . ?
C64 O64 1.351(11) . ?
C64 C65 1.391(11) . ?
O64 C641 1.457(11) . ?
C641 C642 1.484(17) . ?
C641 H64A 0.99 . ?
C641 H64B 0.99 . ?
C642 C645 1.31(3) . ?
C642 C643 1.45(2) . ?
C642 H64C 0.99 . ?
C642 H64D 0.99 . ?
C642 H64J 0.99 . ?
C642 H64K 0.99 . ?
C643 C644 1.49(2) . ?
C643 H64K 0.7594 . ?
C643 H64E 0.99 . ?
C643 H64F 0.99 . ?
C644 H64N 0.98 . ?
C644 H64O 0.98 . ?
C644 H64P 0.98 . ?
C645 C646 1.55(3) . ?
C645 H64L 0.99 . ?
C645 H64M 0.99 . ?
C646 H64G 0.98 . ?
C646 H64H 0.98 . ?
C646 H64I 0.98 . ?
C65 C66 1.384(14) . ?
C65 H65 0.95 . ?
C66 C67 1.383(14) . ?
C66 H66 0.95 . ?
C67 O67 1.353(12) . ?
C67 C67A 1.426(10) . ?
O67 C671 1.443(10) . ?
C671 C672 1.481(16) . ?
C671 H67A 0.99 . ?
C671 H67B 0.99 . ?
C672 C675 1.46(3) . ?
C672 C673 1.50(2) . ?
C672 H67C 0.99 . ?
C672 H67D 0.99 . ?
C672 H67J 0.99 . ?
C672 H67K 0.99 . ?
C673 C674 1.49(2) . ?
C673 H67K 0.5194 . ?
C673 H67E 0.99 . ?
C673 H67F 0.99 . ?
C674 H67G 0.98 . ?
C674 H67H 0.98 . ?
C674 H67I 0.98 . ?
C675 C676 1.49(3) . ?
C675 H67L 0.99 . ?
C675 H67M 0.99 . ?
C676 H67N 0.98 . ?
C676 H67O 0.98 . ?
C676 H67P 0.98 . ?
C6 C72 1.527(11) . ?
C6 H6A 0.99 . ?
C6 H6B 0.99 . ?
C71 C76 1.394(11) . ?
C71 C72 1.412(10) . ?
C71 C7 1.509(9) . ?
C72 C73 1.386(11) . ?
C73 C74 1.379(13) . ?
C73 H73 0.95 . ?
C74 C75 1.354(13) . ?
C74 H74 0.95 . ?
C75 C76 1.383(10) . ?
C75 H75 0.95 . ?
C76 H76 0.95 . ?
C7 N81 1.458(9) . ?
C7 H7A 0.99 . ?
C7 H7B 0.99 . ?
N81 C82 1.343(10) . ?
N81 C87A 1.404(10) . ?
C82 N83 1.376(9) . ?
N83 C83A 1.385(10) . ?
N83 C8 1.437(10) . ?
C83A C87A 1.376(12) . ?
C83A C84 1.438(12) . ?
C84 O84 1.355(11) . ?
C84 C85 1.360(13) . ?
O84 C841 1.458(11) . ?
C841 C842 1.471(16) . ?
C841 H84A 0.99 . ?
C841 H84B 0.99 . ?
C842 C843 1.509(15) . ?
C842 H84C 0.99 . ?
C842 H84D 0.99 . ?
C843 C845 1.35(4) . ?
C843 C844 1.50(2) . ?
C843 H84E 0.99 . ?
C843 H84F 0.99 . ?
C843 H84J 0.99 . ?
C843 H84K 0.99 . ?
C844 H84K 0.5572 . ?
C844 H84G 0.98 . ?
C844 H84H 0.98 . ?
C844 H84I 0.98 . ?
C845 H84L 0.98 . ?
C845 H84M 0.98 . ?
C845 H84N 0.98 . ?
C85 C86 1.385(15) . ?
C85 H85 0.95 . ?
C86 C87 1.390(11) . ?
C86 H86 0.95 . ?
C87 O87 1.331(12) . ?
C87 C87A 1.404(12) . ?
O87 C871 1.429(14) . ?
C871 C872 1.33(2) . ?
C871 C875 1.60(3) . ?
C871 H87A 0.99 . ?
C871 H87B 0.99 . ?
C871 H87J 0.99 . ?
C871 H87K 0.99 . ?
C872 C873 1.59(3) . ?
C872 H87C 0.99 . ?
C872 H87D 0.99 . ?
C873 C874 1.43(3) . ?
C873 H87E 0.99 . ?
C873 H87F 0.99 . ?
C874 H87G 0.98 . ?
C874 H87H 0.98 . ?
C874 H87I 0.98 . ?
C875 C876 1.54(3) . ?
C875 H87L 0.99 . ?
C875 H87M 0.99 . ?
C876 C877 1.50(3) . ?
C876 H87N 0.99 . ?
C876 H87O 0.99 . ?
C877 H87P 0.98 . ?
C877 H87Q 0.98 . ?
C877 H87R 0.98 . ?
C8 H8A 0.98 . ?
C8 H8B 0.98 . ?
C8 H8C 0.98 . ?
N101 C101 1.13(3) . ?
C101 C102 1.40(2) . ?
C102 H10A 0.98 . ?
C102 H10B 0.98 . ?
C102 H10C 0.98 . ?
N201 C201 1.16(4) . ?
 
loop_
    _geom_angle_atom_site_label_1
    _geom_angle_atom_site_label_2
    _geom_angle_atom_site_label_3
    _geom_angle
    _geom_angle_site_symmetry_1
    _geom_angle_site_symmetry_3
    _geom_angle_publ_flag
Br4 Ag0 Br3 144.13(4) . . ?
Br4 Ag0 Br2 109.63(4) . . ?
Br3 Ag0 Br2 99.68(3) . . ?
Br4 Ag0 Br1 104.78(3) . . ?
Br3 Ag0 Br1 90.56(3) . . ?
Br2 Ag0 Br1 98.26(3) . . ?
C22 Ag1 C42 149.5(3) . . ?
C22 Ag1 Br4 106.81(19) . . ?
C42 Ag1 Br4 103.72(19) . . ?
C62 Ag2 Br2 143.7(2) . . ?
C62 Ag2 Br1 112.0(2) . . ?
Br2 Ag2 Br1 103.57(3) . . ?
C82 Ag3 Br1 160.09(18) . . ?
C82 Ag3 Br3 107.26(18) . . ?
Br1 Ag3 Br3 92.57(3) . . ?
Ag3 Br1 Ag2 68.91(3) . . ?
Ag3 Br1 Ag0 70.72(2) . . ?
Ag2 Br1 Ag0 71.80(3) . . ?
Ag2 Br2 Ag0 78.52(3) . . ?
Ag0 Br3 Ag3 69.89(2) . . ?
Ag0 Br4 Ag1 64.81(2) . . ?
N21 C1 H1A 109.5 . . ?
N21 C1 H1B 109.5 . . ?
H1A C1 H1B 109.5 . . ?
N21 C1 H1C 109.5 . . ?
H1A C1 H1C 109.5 . . ?
H1B C1 H1C 109.5 . . ?
C22 N21 C27A 112.3(6) . . ?
C22 N21 C1 122.1(7) . . ?
C27A N21 C1 125.5(7) . . ?
N21 C22 N23 103.8(6) . . ?
N21 C22 Ag1 134.5(6) . . ?
N23 C22 Ag1 121.7(5) . . ?
C23A N23 C22 111.9(6) . . ?
C23A N23 C2 126.9(6) . . ?
C22 N23 C2 121.1(6) . . ?
N23 C23A C27A 106.4(7) . . ?
N23 C23A C24 133.0(7) . . ?
C27A C23A C24 120.6(8) . . ?
O24 C24 C25 125.7(8) . . ?
O24 C24 C23A 117.1(7) . . ?
C25 C24 C23A 117.2(8) . . ?
C24 O24 C241 117.9(6) . . ?
O24 C241 C242 107.6(7) . . ?
O24 C241 H24A 110.2 . . ?
C242 C241 H24A 110.2 . . ?
O24 C241 H24B 110.2 . . ?
C242 C241 H24B 110.2 . . ?
H24A C241 H24B 108.5 . . ?
C241 C242 C243 112.9(8) . . ?
C241 C242 H24C 109 . . ?
C243 C242 H24C 109 . . ?
C241 C242 H24D 109 . . ?
C243 C242 H24D 109 . . ?
H24C C242 H24D 107.8 . . ?
C244 C243 C242 113.7(10) . . ?
C244 C243 H24E 108.8 . . ?
C242 C243 H24E 108.8 . . ?
C244 C243 H24F 108.8 . . ?
C242 C243 H24F 108.8 . . ?
H24E C243 H24F 107.7 . . ?
C243 C244 H24G 109.5 . . ?
C243 C244 H24H 109.5 . . ?
H24G C244 H24H 109.5 . . ?
C243 C244 H24I 109.5 . . ?
H24G C244 H24I 109.5 . . ?
H24H C244 H24I 109.5 . . ?
C24 C25 C26 121.6(9) . . ?
C24 C25 H25 119.2 . . ?
C26 C25 H25 119.2 . . ?
C27 C26 C25 121.1(9) . . ?
C27 C26 H26 119.4 . . ?
C25 C26 H26 119.4 . . ?
C26 C27 O27 125.4(9) . . ?
C26 C27 C27A 118.2(9) . . ?
O27 C27 C27A 116.3(9) . . ?
C27 O27 C271 117.0(9) . . ?
O27 C271 C272 106.8(10) . . ?
O27 C271 H27A 110.4 . . ?
C272 C271 H27A 110.4 . . ?
O27 C271 H27B 110.4 . . ?
C272 C271 H27B 110.4 . . ?
H27A C271 H27B 108.6 . . ?
C273 C272 C271 112.6(11) . . ?
C273 C272 H27C 109.1 . . ?
C271 C272 H27C 109.1 . . ?
C273 C272 H27D 109.1 . . ?
C271 C272 H27D 109.1 . . ?
H27C C272 H27D 107.8 . . ?
C272 C273 C274 106.5(17) . . ?
C272 C273 C275 105(3) . . ?
C274 C273 C275 115(3) . . ?
C272 C273 H27E 110.4 . . ?
C274 C273 H27E 110.4 . . ?
C275 C273 H27E 109.6 . . ?
C272 C273 H27F 110.4 . . ?
C274 C273 H27F 110.4 . . ?
H27E C273 H27F 108.6 . . ?
C272 C273 H27J 110.7 . . ?
C275 C273 H27J 110.7 . . ?
C272 C273 H27K 110.7 . . ?
C275 C273 H27K 110.8 . . ?
H27J C273 H27K 108.8 . . ?
C273 C274 H27G 109.5 . . ?
C273 C274 H27H 109.5 . . ?
H27G C274 H27H 109.5 . . ?
C273 C274 H27I 109.5 . . ?
H27G C274 H27I 109.5 . . ?
H27H C274 H27I 109.5 . . ?
C273 C275 H27L 109.5 . . ?
C273 C275 H27M 109.5 . . ?
H27L C275 H27M 109.5 . . ?
C273 C275 H27N 109.5 . . ?
H27L C275 H27N 109.5 . . ?
H27M C275 H27N 109.5 . . ?
N21 C27A C23A 105.6(7) . . ?
N21 C27A C27 133.1(8) . . ?
C23A C27A C27 121.3(8) . . ?
N23 C2 C32 113.4(6) . . ?
N23 C2 H2A 108.9 . . ?
C32 C2 H2A 108.9 . . ?
N23 C2 H2B 108.9 . . ?
C32 C2 H2B 108.9 . . ?
H2A C2 H2B 107.7 . . ?
C32 C31 C36 118.9(7) . . ?
C32 C31 C3 124.3(6) . . ?
C36 C31 C3 116.8(7) . . ?
C31 C32 C33 119.1(7) . . ?
C31 C32 C2 124.5(6) . . ?
C33 C32 C2 116.3(7) . . ?
C34 C33 C32 120.7(8) . . ?
C34 C33 H33 119.7 . . ?
C32 C33 H33 119.7 . . ?
C35 C34 C33 119.8(8) . . ?
C35 C34 H34 120.1 . . ?
C33 C34 H34 120.1 . . ?
C36 C35 C34 120.1(7) . . ?
C36 C35 H35 119.9 . . ?
C34 C35 H35 119.9 . . ?
C35 C36 C31 121.3(8) . . ?
C35 C36 H36 119.3 . . ?
C31 C36 H36 119.3 . . ?
N41 C3 C31 111.9(6) . . ?
N41 C3 H3A 109.2 . . ?
C31 C3 H3A 109.2 . . ?
N41 C3 H3B 109.2 . . ?
C31 C3 H3B 109.2 . . ?
H3A C3 H3B 107.9 . . ?
C42 N41 C47A 110.6(6) . . ?
C42 N41 C3 121.6(6) . . ?
C47A N41 C3 127.8(6) . . ?
N43 C42 N41 105.6(6) . . ?
N43 C42 Ag1 132.6(5) . . ?
N41 C42 Ag1 121.8(5) . . ?
C42 N43 C43A 112.2(6) . . ?
C42 N43 C4 122.7(6) . . ?
C43A N43 C4 125.1(6) . . ?
C44 C43A N43 132.5(7) . . ?
C44 C43A C47A 122.2(7) . . ?
N43 C43A C47A 105.3(6) . . ?
C45 C44 O44 125.8(8) . . ?
C45 C44 C43A 117.1(7) . . ?
O44 C44 C43A 117.0(7) . . ?
C44 O44 C441 117.2(7) . . ?
O44 C441 C442 106.8(9) . . ?
O44 C441 H44A 110.4 . . ?
C442 C441 H44A 110.4 . . ?
O44 C441 H44B 110.4 . . ?
C442 C441 H44B 110.4 . . ?
H44A C441 H44B 108.6 . . ?
C441 C442 C443 111.8(11) . . ?
C441 C442 H44C 109.3 . . ?
C443 C442 H44C 109.3 . . ?
C441 C442 H44D 109.3 . . ?
C443 C442 H44D 109.3 . . ?
H44C C442 H44D 107.9 . . ?
C444 C443 C442 123.7(19) . . ?
C442 C443 C445 97(2) . . ?
C444 C443 H44E 106.4 . . ?
C442 C443 H44E 106.4 . . ?
C444 C443 H44F 106.4 . . ?
C442 C443 H44F 106.4 . . ?
H44E C443 H44F 106.5 . . ?
C442 C443 H44J 112.4 . . ?
C445 C443 H44J 112.4 . . ?
C442 C443 H44K 112.4 . . ?
C445 C443 H44K 112.3 . . ?
H44J C443 H44K 109.9 . . ?
C443 C444 H44G 109.5 . . ?
C443 C444 H44H 109.5 . . ?
H44G C444 H44H 109.5 . . ?
C443 C444 H44I 109.5 . . ?
H44G C444 H44I 109.5 . . ?
H44H C444 H44I 109.5 . . ?
C443 C445 H44L 109.5 . . ?
C443 C445 H44M 109.5 . . ?
H44L C445 H44M 109.5 . . ?
C443 C445 H44N 109.5 . . ?
H44L C445 H44N 109.5 . . ?
H44M C445 H44N 109.5 . . ?
C44 C45 C46 121.5(8) . . ?
C44 C45 H45 119.3 . . ?
C46 C45 H45 119.3 . . ?
C47 C46 C45 121.9(8) . . ?
C47 C46 H46 119 . . ?
C45 C46 H46 119 . . ?
C46 C47 O47 125.9(7) . . ?
C46 C47 C47A 117.4(7) . . ?
O47 C47 C47A 116.6(7) . . ?
C47 O47 C471 116.0(6) . . ?
O47 C471 C472 106.5(7) . . ?
O47 C471 H47A 110.4 . . ?
C472 C471 H47A 110.4 . . ?
O47 C471 H47B 110.4 . . ?
C472 C471 H47B 110.4 . . ?
H47A C471 H47B 108.6 . . ?
C475 C472 C473 113(2) . . ?
C475 C472 C471 119.9(15) . . ?
C473 C472 C471 112.9(13) . . ?
C473 C472 H47C 109 . . ?
C471 C472 H47C 109 . . ?
C473 C472 H47D 109 . . ?
C471 C472 H47D 109 . . ?
H47C C472 H47D 107.8 . . ?
C475 C472 H47J 107.4 . . ?
C471 C472 H47J 107.4 . . ?
C475 C472 H47K 107.3 . . ?
C471 C472 H47K 107.4 . . ?
H47J C472 H47K 106.9 . . ?
C472 C473 C474 104.5(19) . . ?
C474 C473 H47K 110.4 . . ?
C472 C473 H47E 110.9 . . ?
C474 C473 H47E 110.9 . . ?
C472 C473 H47F 110.9 . . ?
C474 C473 H47F 110.9 . . ?
H47E C473 H47F 108.9 . . ?
C473 C474 H47G 109.5 . . ?
C473 C474 H47H 109.5 . . ?
H47G C474 H47H 109.5 . . ?
C473 C474 H47I 109.5 . . ?
H47G C474 H47I 109.5 . . ?
H47H C474 H47I 109.5 . . ?
C472 C475 C476 113(2) . . ?
C472 C475 H47L 108.9 . . ?
C476 C475 H47L 108.9 . . ?
C472 C475 H47M 108.9 . . ?
C476 C475 H47M 108.9 . . ?
H47L C475 H47M 107.7 . . ?
C475 C476 H47N 109.5 . . ?
C475 C476 H47O 109.5 . . ?
H47N C476 H47O 109.5 . . ?
C475 C476 H47P 109.5 . . ?
H47N C476 H47P 109.5 . . ?
H47O C476 H47P 109.5 . . ?
N41 C47A C43A 106.3(6) . . ?
N41 C47A C47 133.7(7) . . ?
C43A C47A C47 119.9(7) . . ?
N43 C4 H4A 109.5 . . ?
N43 C4 H4B 109.5 . . ?
H4A C4 H4B 109.5 . . ?
N43 C4 H4C 109.5 . . ?
H4A C4 H4C 109.5 . . ?
H4B C4 H4C 109.5 . . ?
N61 C5 H5A 109.5 . . ?
N61 C5 H5B 109.5 . . ?
H5A C5 H5B 109.5 . . ?
N61 C5 H5C 109.5 . . ?
H5A C5 H5C 109.5 . . ?
H5B C5 H5C 109.5 . . ?
C62 N61 C67A 109.6(7) . . ?
C62 N61 C5 124.7(7) . . ?
C67A N61 C5 125.7(6) . . ?
N61 C62 N63 106.7(6) . . ?
N61 C62 Ag2 126.1(6) . . ?
N63 C62 Ag2 126.6(5) . . ?
C62 N63 C63A 110.2(6) . . ?
C62 N63 C6 122.0(6) . . ?
C63A N63 C6 126.3(7) . . ?
C67A C63A N63 106.0(7) . . ?
C67A C63A C64 122.4(7) . . ?
N63 C63A C64 131.4(8) . . ?
O64 C64 C65 127.0(8) . . ?
O64 C64 C63A 117.9(7) . . ?
C65 C64 C63A 115.1(9) . . ?
C64 O64 C641 117.5(7) . . ?
O64 C641 C642 106.5(9) . . ?
O64 C641 H64A 110.4 . . ?
C642 C641 H64A 110.4 . . ?
O64 C641 H64B 110.4 . . ?
C642 C641 H64B 110.4 . . ?
H64A C641 H64B 108.6 . . ?
C645 C642 C641 136(2) . . ?
C643 C642 C641 121.0(16) . . ?
C643 C642 H64C 107.1 . . ?
C641 C642 H64C 107.1 . . ?
C645 C642 H64D 105.4 . . ?
C643 C642 H64D 107.1 . . ?
C641 C642 H64D 107.1 . . ?
H64C C642 H64D 106.8 . . ?
C645 C642 H64J 103 . . ?
C641 C642 H64J 103.1 . . ?
C645 C642 H64K 103 . . ?
C641 C642 H64K 103.1 . . ?
H64J C642 H64K 105.1 . . ?
C642 C643 C644 118.2(19) . . ?
C642 C643 H64E 107.8 . . ?
C644 C643 H64E 107.8 . . ?
C642 C643 H64F 107.8 . . ?
C644 C643 H64F 107.8 . . ?
H64E C643 H64F 107.1 . . ?
C643 C644 H64N 109.5 . . ?
C643 C644 H64O 109.5 . . ?
H64N C644 H64O 109.5 . . ?
C643 C644 H64P 109.5 . . ?
H64N C644 H64P 109.5 . . ?
H64O C644 H64P 109.5 . . ?
C642 C645 C646 116(3) . . ?
C642 C645 H64L 108.2 . . ?
C646 C645 H64L 108.2 . . ?
C642 C645 H64M 108.2 . . ?
C646 C645 H64M 108.2 . . ?
H64L C645 H64M 107.4 . . ?
C645 C646 H64G 109.5 . . ?
C645 C646 H64H 109.5 . . ?
H64G C646 H64H 109.5 . . ?
C645 C646 H64I 109.5 . . ?
H64G C646 H64I 109.5 . . ?
H64H C646 H64I 109.5 . . ?
C66 C65 C64 122.6(8) . . ?
C66 C65 H65 118.7 . . ?
C64 C65 H65 118.7 . . ?
C67 C66 C65 122.2(8) . . ?
C67 C66 H66 118.9 . . ?
C65 C66 H66 118.9 . . ?
O67 C67 C66 127.3(8) . . ?
O67 C67 C67A 116.8(8) . . ?
C66 C67 C67A 115.7(9) . . ?
C67 O67 C671 116.7(8) . . ?
O67 C671 C672 107.0(9) . . ?
O67 C671 H67A 110.3 . . ?
C672 C671 H67A 110.3 . . ?
O67 C671 H67B 110.3 . . ?
C672 C671 H67B 110.3 . . ?
H67A C671 H67B 108.6 . . ?
C675 C672 C671 117.0(15) . . ?
C675 C672 C673 106.1(19) . . ?
C671 C672 C673 112.7(12) . . ?
C671 C672 H67C 109.1 . . ?
C673 C672 H67C 109.1 . . ?
C671 C672 H67D 109.1 . . ?
C673 C672 H67D 109.1 . . ?
H67C C672 H67D 107.8 . . ?
C675 C672 H67J 108 . . ?
C671 C672 H67J 108 . . ?
C673 C672 H67J 104.2 . . ?
C675 C672 H67K 108.1 . . ?
C671 C672 H67K 108.1 . . ?
H67J C672 H67K 107.3 . . ?
C674 C673 C672 109.9(18) . . ?
C674 C673 H67E 109.7 . . ?
C672 C673 H67E 109.7 . . ?
C674 C673 H67F 109.7 . . ?
C672 C673 H67F 109.7 . . ?
C673 C674 H67G 109.5 . . ?
C673 C674 H67H 109.5 . . ?
H67G C674 H67H 109.5 . . ?
C673 C674 H67I 109.5 . . ?
H67G C674 H67I 109.5 . . ?
H67H C674 H67I 109.5 . . ?
C672 C675 C676 117(3) . . ?
C672 C675 H67L 108.2 . . ?
C676 C675 H67L 108.2 . . ?
C672 C675 H67M 108.1 . . ?
C676 C675 H67M 108.1 . . ?
H67L C675 H67M 107.3 . . ?
C675 C676 H67N 109.5 . . ?
C675 C676 H67O 109.5 . . ?
H67N C676 H67O 109.5 . . ?
C675 C676 H67P 109.5 . . ?
H67N C676 H67P 109.5 . . ?
H67O C676 H67P 109.5 . . ?
C63A C67A N61 107.5(6) . . ?
C63A C67A C67 121.9(8) . . ?
N61 C67A C67 130.7(9) . . ?
N63 C6 C72 110.1(6) . . ?
N63 C6 H6A 109.6 . . ?
C72 C6 H6A 109.6 . . ?
N63 C6 H6B 109.6 . . ?
C72 C6 H6B 109.6 . . ?
H6A C6 H6B 108.2 . . ?
C76 C71 C72 118.2(7) . . ?
C76 C71 C7 121.2(7) . . ?
C72 C71 C7 120.5(7) . . ?
C73 C72 C71 118.8(8) . . ?
C73 C72 C6 119.5(7) . . ?
C71 C72 C6 121.7(7) . . ?
C74 C73 C72 121.4(8) . . ?
C74 C73 H73 119.3 . . ?
C72 C73 H73 119.3 . . ?
C75 C74 C73 120.1(8) . . ?
C75 C74 H74 119.9 . . ?
C73 C74 H74 119.9 . . ?
C74 C75 C76 120.1(8) . . ?
C74 C75 H75 119.9 . . ?
C76 C75 H75 119.9 . . ?
C75 C76 C71 121.2(7) . . ?
C75 C76 H76 119.4 . . ?
C71 C76 H76 119.4 . . ?
N81 C7 C71 113.3(6) . . ?
N81 C7 H7A 108.9 . . ?
C71 C7 H7A 108.9 . . ?
N81 C7 H7B 108.9 . . ?
C71 C7 H7B 108.9 . . ?
H7A C7 H7B 107.7 . . ?
C82 N81 C87A 112.3(6) . . ?
C82 N81 C7 123.4(6) . . ?
C87A N81 C7 124.0(7) . . ?
N81 C82 N83 104.7(6) . . ?
N81 C82 Ag3 126.3(5) . . ?
N83 C82 Ag3 128.3(5) . . ?
C82 N83 C83A 110.7(7) . . ?
C82 N83 C8 122.8(7) . . ?
C83A N83 C8 126.4(7) . . ?
C87A C83A N83 107.4(7) . . ?
C87A C83A C84 120.5(8) . . ?
N83 C83A C84 132.1(8) . . ?
O84 C84 C85 128.1(8) . . ?
O84 C84 C83A 116.5(8) . . ?
C85 C84 C83A 115.4(9) . . ?
C84 O84 C841 114.6(8) . . ?
O84 C841 C842 107.9(9) . . ?
O84 C841 H84A 110.1 . . ?
C842 C841 H84A 110.1 . . ?
O84 C841 H84B 110.1 . . ?
C842 C841 H84B 110.1 . . ?
H84A C841 H84B 108.4 . . ?
C841 C842 C843 114.6(9) . . ?
C841 C842 H84C 108.6 . . ?
C843 C842 H84C 108.6 . . ?
C841 C842 H84D 108.6 . . ?
C843 C842 H84D 108.6 . . ?
H84C C842 H84D 107.6 . . ?
C845 C843 C842 111(2) . . ?
C844 C843 C842 118.4(13) . . ?
C844 C843 H84E 107.7 . . ?
C842 C843 H84E 107.7 . . ?
C844 C843 H84F 107.7 . . ?
C842 C843 H84F 107.7 . . ?
H84E C843 H84F 107.1 . . ?
C845 C843 H84J 109.5 . . ?
C844 C843 H84J 108.8 . . ?
C842 C843 H84J 109.4 . . ?
C845 C843 H84K 109.4 . . ?
C842 C843 H84K 109.4 . . ?
H84J C843 H84K 108 . . ?
C843 C844 H84G 109.5 . . ?
C843 C844 H84H 109.5 . . ?
H84G C844 H84H 109.5 . . ?
C843 C844 H84I 109.5 . . ?
H84G C844 H84I 109.5 . . ?
H84H C844 H84I 109.5 . . ?
C843 C845 H84L 109.5 . . ?
C843 C845 H84M 109.5 . . ?
H84L C845 H84M 109.5 . . ?
C843 C845 H84N 109.5 . . ?
H84L C845 H84N 109.5 . . ?
H84M C845 H84N 109.5 . . ?
C84 C85 C86 124.1(9) . . ?
C84 C85 H85 117.9 . . ?
C86 C85 H85 117.9 . . ?
C85 C86 C87 121.2(10) . . ?
C85 C86 H86 119.4 . . ?
C87 C86 H86 119.4 . . ?
O87 C87 C86 125.3(9) . . ?
O87 C87 C87A 119.0(8) . . ?
C86 C87 C87A 115.7(9) . . ?
C87 O87 C871 117.1(10) . . ?
C872 C871 O87 123.7(19) . . ?
O87 C871 C875 108(2) . . ?
C872 C871 H87A 106.2 . . ?
O87 C871 H87A 106.4 . . ?
C872 C871 H87B 106.5 . . ?
O87 C871 H87B 106.4 . . ?
H87A C871 H87B 106.5 . . ?
O87 C871 H87J 110.3 . . ?
C875 C871 H87J 110.1 . . ?
O87 C871 H87K 110.1 . . ?
C875 C871 H87K 110.2 . . ?
H87J C871 H87K 108.5 . . ?
C871 C872 C873 105(2) . . ?
C871 C872 H87C 110.7 . . ?
C873 C872 H87C 110.7 . . ?
C871 C872 H87D 111 . . ?
C873 C872 H87D 111 . . ?
H87C C872 H87D 108.9 . . ?
C874 C873 C872 103(2) . . ?
C874 C873 H87E 111.1 . . ?
C872 C873 H87E 111.1 . . ?
C874 C873 H87F 111.1 . . ?
C872 C873 H87F 110.9 . . ?
H87E C873 H87F 109 . . ?
C873 C874 H87G 109.4 . . ?
C873 C874 H87H 109.5 . . ?
H87G C874 H87H 109.5 . . ?
C873 C874 H87I 109.5 . . ?
H87G C874 H87I 109.5 . . ?
H87H C874 H87I 109.5 . . ?
C876 C875 C871 115(2) . . ?
C876 C875 H87L 108.4 . . ?
C871 C875 H87L 108.4 . . ?
C876 C875 H87M 108.5 . . ?
C871 C875 H87M 108.4 . . ?
H87L C875 H87M 107.5 . . ?
C877 C876 C875 115(3) . . ?
C877 C876 H87N 108.5 . . ?
C875 C876 H87N 108.5 . . ?
C877 C876 H87O 108.5 . . ?
C875 C876 H87O 108.5 . . ?
H87N C876 H87O 107.5 . . ?
C876 C877 H87P 109.5 . . ?
C876 C877 H87Q 109.5 . . ?
H87P C877 H87Q 109.5 . . ?
C876 C877 H87R 109.5 . . ?
H87P C877 H87R 109.5 . . ?
H87Q C877 H87R 109.5 . . ?
C83A C87A C87 123.0(8) . . ?
C83A C87A N81 104.9(7) . . ?
C87 C87A N81 132.0(8) . . ?
N83 C8 H8A 109.5 . . ?
N83 C8 H8B 109.5 . . ?
H8A C8 H8B 109.5 . . ?
N83 C8 H8C 109.5 . . ?
H8A C8 H8C 109.5 . . ?
H8B C8 H8C 109.5 . . ?
N101 C101 C102 173(3) . . ?
C101 C102 H10A 109.5 . . ?
C101 C102 H10B 109.5 . . ?
H10A C102 H10B 109.5 . . ?
C101 C102 H10C 109.5 . . ?
H10A C102 H10C 109.5 . . ?
H10B C102 H10C 109.5 . . ?


loop_
  _platon_squeeze_void_nr
  _platon_squeeze_void_average_x
  _platon_squeeze_void_average_y
  _platon_squeeze_void_average_z
  _platon_squeeze_void_volume
  _platon_squeeze_void_count_electrons
  _platon_squeeze_void_content
   1  0.000  0.500  0.500       248        42 ' '
   2  0.500  1.000  1.000       248        44 ' '


_iucr_refine_instructions_details
;
TITL ps290a in P2(1)/n
CELL  1.54178  14.6677  35.8151  17.1801   90.000   91.928   90.000
ZERR     4.00   0.0001   0.0003   0.0002    0.000    0.001    0.000
LATT   1
SYMM  1/2 - X, 1/2 + Y, 1/2 - Z
SFAC  C    H    N    O    BR   AG
UNIT  328  444  36   32   16   16
MERG   2
dfix   1.52 .04 C273 C274  C273  C275   C473 C474
dfix  1.52 .04 C443 c444 C443 c445
dfix  2.50 .04 C442 C445 C442 C444
dfix  1.52 .04 C472 C473 C473 C474 C472 C475 C475 c476
dfix  2.50 .04 C471 C475 C472 c476
dfix 1.52 .03 C871 C872 C872 C873 C873 C874
dfix 1.52 .04  C871 C875 C875 C876 C876 C877
DFIX  1.52 .04 C642 C643 C643 C644 C642 C645 C645 C646
DFIX  2.50 .04 C641 C643 C642 C644 C641 C645 C642 C646
DFIX  1.52 .04 C672 C673 C673 C674 C672 C675 C675 C676
DFIX  2.50 .04 C671 C673 C672 C674 C671 C675 C672 C676
dfix   2.50 .04 C871 C873 C872 C874 C871 c876 C875 C877
dfix   2.47 .04  O87 C872 O87 C875
dfix  1.40 .02 C86 C87
exyz  C102 C202
eadp   C102 C202
eadp  C875 C872
eadp   C874  C877
eadp C274 C275
eadp C444 C445
FMAP   2
PLAN   35
ACTA
BOND   $H
WGHT     0.06080    71.53970
L.S.  25
TEMP  -173.00
FVAR     8.66146   0.63064
AG0   6    0.791288    0.347775    0.508714    11.00000    0.03211    0.06443 =
        0.06689   -0.00818    0.00916   -0.00181
AG1   6    0.988721    0.334266    0.484093    11.00000    0.03041    0.03388 =
        0.05613    0.00167    0.00775   -0.00010
AG2   6    0.599252    0.399288    0.477342    11.00000    0.03148    0.04459 =
        0.06391   -0.01518    0.00822    0.00108
AG3   6    0.592021    0.313197    0.490159    11.00000    0.03023    0.04978 =
        0.05221    0.00038    0.00530   -0.00025
BR1   5    0.637313    0.352251    0.610606    11.00000    0.03753    0.06152 =
        0.04565   -0.00577    0.00792    0.00783
BR2   5    0.704050    0.372849    0.372694    11.00000    0.03393    0.04255 =
        0.05405   -0.00833    0.01197    0.00052
BR3   5    0.765823    0.274967    0.492035    11.00000    0.02996    0.05421 =
        0.04900   -0.00057    0.00527    0.00858
BR4   5    0.904556    0.398339    0.560788    11.00000    0.04160    0.04856 =
        0.07531   -0.01741    0.00267    0.00886
C1    1    0.939897    0.406095    0.340777    11.00000    0.04983    0.04397 =
        0.06719    0.01118    0.02062    0.00616
AFIX  137
H1A   2    0.938794    0.407032    0.397747    11.00000   -1.50000
H1B   2    0.886499    0.419219    0.318525    11.00000   -1.50000
H1C   2    0.995617    0.418121    0.323275    11.00000   -1.50000
AFIX    0
N21   3    0.938079    0.367189    0.315101    11.00000    0.03736    0.03881 =
        0.06301    0.00471    0.01952    0.00540
C22   1    0.953336    0.338281    0.365410    11.00000    0.02940    0.03742 =
        0.05182    0.00449    0.01288    0.00432
N23   3    0.943683    0.306917    0.318852    11.00000    0.02726    0.03872 =
        0.05111    0.00303    0.00955    0.00305
C23A  1    0.923411    0.316074    0.242629    11.00000    0.03815    0.04400 =
        0.05667    0.00470    0.01446    0.00670
C24   1    0.906952    0.294426    0.174445    11.00000    0.04338    0.05350 =
        0.04964    0.00482    0.01978    0.01025
O24   4    0.913776    0.257140    0.181752    11.00000    0.04356    0.05036 =
        0.04986   -0.00528    0.00818    0.01013
C241  1    0.879922    0.234447    0.118273    11.00000    0.04122    0.07657 =
        0.04269   -0.00492    0.00852    0.01142
AFIX   23
H24A  2    0.915852    0.238968    0.071432    11.00000   -1.20000
H24B  2    0.815310    0.240599    0.105619    11.00000   -1.20000
AFIX    0
C242  1    0.888345    0.194849    0.142714    11.00000    0.03005    0.06937 =
        0.05747   -0.02354    0.01289    0.01061
AFIX   23
H24C  2    0.856919    0.191420    0.192314    11.00000   -1.20000
H24D  2    0.953645    0.188853    0.152323    11.00000   -1.20000
AFIX    0
C243  1    0.848325    0.167895    0.082698    11.00000    0.03429    0.10649 =
        0.07907   -0.04414    0.01677   -0.00226
AFIX   23
H24E  2    0.782416    0.173226    0.074945    11.00000   -1.20000
H24F  2    0.877693    0.172255    0.032453    11.00000   -1.20000
AFIX    0
C244  1    0.859881    0.128210    0.104458    11.00000    0.04037    0.07235 =
        0.19504   -0.06265    0.01168    0.00668
AFIX  137
H24G  2    0.925041    0.122204    0.108741    11.00000   -1.50000
H24H  2    0.830322    0.112418    0.064445    11.00000   -1.50000
H24I  2    0.831944    0.123694    0.154616    11.00000   -1.50000
AFIX    0
C25   1    0.886330    0.313443    0.106488    11.00000    0.07466    0.06319 =
        0.05257   -0.00526    0.02327    0.01196
AFIX   43
H25   2    0.872956    0.299735    0.060160    11.00000   -1.20000
AFIX    0
C26   1    0.884564    0.353268    0.103982    11.00000    0.10738    0.07420 =
        0.05738    0.01569    0.03556    0.02015
AFIX   43
H26   2    0.873455    0.365548    0.055574    11.00000   -1.20000
AFIX    0
C27   1    0.898496    0.373912    0.169635    11.00000    0.08122    0.05325 =
        0.06111    0.01081    0.02732    0.01397
O27   4    0.897767    0.412469    0.173217    11.00000    0.13342    0.05273 =
        0.07059    0.02035    0.03411    0.01202
C271  1    0.875727    0.432163    0.102041    11.00000    0.10995    0.07294 =
        0.08890    0.02346    0.03173    0.01282
AFIX   23
H27A  2    0.814416    0.424848    0.081541    11.00000   -1.20000
H27B  2    0.920848    0.426351    0.062210    11.00000   -1.20000
AFIX    0
C272  1    0.877848    0.473619    0.121537    11.00000    0.08265    0.07622 =
        0.11086    0.03104    0.02253    0.00855
AFIX   23
H27C  2    0.857381    0.488016    0.074962    11.00000   -1.20000
H27D  2    0.834514    0.478618    0.163243    11.00000   -1.20000
AFIX    0
C273  1    0.967767    0.486329    0.146790    11.00000    0.09723    0.08713 =
        0.13982    0.01753   -0.00642    0.00965
PART    1
AFIX   23
H27E  2    0.994234    0.469404    0.187119    21.00000   -1.20000
H27F  2    0.964483    0.511810    0.168854    21.00000   -1.20000
PART    2
H27J  2    1.008557    0.487932    0.102157   -21.00000   -1.20000
H27K  2    0.995194    0.469126    0.186138   -21.00000   -1.20000
AFIX    0
PART    1
C274  1    1.029483    0.486190    0.070305    21.00000    0.17909
AFIX   33
H27G  2    1.045174    0.460417    0.057047    21.00000   -1.50000
H27H  2    1.085496    0.500469    0.081047    21.00000   -1.50000
H27I  2    0.995100    0.497599    0.026568    21.00000   -1.50000
AFIX    0
PART    2
C275  1    0.951584    0.527275    0.184112   -21.00000    0.17909
AFIX   33
H27L  2    0.930710    0.544568    0.143053   -21.00000   -1.50000
H27M  2    1.008927    0.536427    0.208026   -21.00000   -1.50000
H27N  2    0.905332    0.525582    0.223820   -21.00000   -1.50000
AFIX    0
PART    0
C27A  1    0.918851    0.355111    0.239662    11.00000    0.04644    0.04658 =
        0.06106    0.01152    0.02840    0.00564
C2    1    0.950737    0.268854    0.352451    11.00000    0.03177    0.03641 =
        0.05204   -0.00171    0.00773   -0.00095
AFIX   23
H2A   2    0.922325    0.250883    0.315175    11.00000   -1.20000
H2B   2    0.915881    0.268001    0.400773    11.00000   -1.20000
AFIX    0
C31   1    1.081018    0.244897    0.444025    11.00000    0.03511    0.02494 =
        0.05833   -0.00276    0.00601   -0.00260
C32   1    1.048824    0.256661    0.371208    11.00000    0.02735    0.02711 =
        0.05608   -0.00473    0.01007   -0.00325
C33   1    1.107589    0.256013    0.308738    11.00000    0.04132    0.03665 =
        0.05887   -0.00508    0.01188    0.00418
AFIX   43
H33   2    1.086002    0.263897    0.258638    11.00000   -1.20000
AFIX    0
C34   1    1.196746    0.244015    0.319176    11.00000    0.03734    0.04506 =
        0.07115   -0.01545    0.01233    0.00537
AFIX   43
H34   2    1.236512    0.244135    0.276657    11.00000   -1.20000
AFIX    0
C35   1    1.227602    0.231948    0.391039    11.00000    0.02928    0.04153 =
        0.08964   -0.01443   -0.00012    0.00835
AFIX   43
H35   2    1.288466    0.223200    0.398079    11.00000   -1.20000
AFIX    0
C36   1    1.170984    0.232477    0.452572    11.00000    0.03355    0.03106 =
        0.07022   -0.00644    0.00248    0.00531
AFIX   43
H36   2    1.193311    0.224222    0.502188    11.00000   -1.20000
AFIX    0
C3    1    1.024954    0.244420    0.515877    11.00000    0.03661    0.02904 =
        0.05815    0.00542    0.00481   -0.00074
AFIX   23
H3A   2    0.962667    0.253509    0.502388    11.00000   -1.20000
H3B   2    1.019907    0.218425    0.534847    11.00000   -1.20000
AFIX    0
N41   3    1.065514    0.267924    0.578482    11.00000    0.03500    0.03612 =
        0.04967    0.00447    0.00495   -0.00136
C42   1    1.058810    0.306021    0.576534    11.00000    0.02801    0.03349 =
        0.05354    0.00486    0.01276    0.00043
N43   3    1.102544    0.318033    0.641253    11.00000    0.03190    0.03611 =
        0.05288   -0.00163    0.01040   -0.00265
C43A  1    1.137534    0.288688    0.686375    11.00000    0.02865    0.04316 =
        0.05092    0.00208    0.01223   -0.00250
C44   1    1.186169    0.287619    0.757292    11.00000    0.03437    0.05013 =
        0.05350   -0.00334    0.01501   -0.00735
O44   4    1.206058    0.321285    0.792372    11.00000    0.05846    0.05662 =
        0.04890   -0.00468    0.00474   -0.00849
C441  1    1.264710    0.320572    0.860838    11.00000    0.05688    0.07731 =
        0.05419   -0.00315    0.00422   -0.02547
AFIX   23
H44A  2    1.324649    0.309683    0.848791    11.00000   -1.20000
H44B  2    1.237179    0.305343    0.902011    11.00000   -1.20000
AFIX    0
C442  1    1.275867    0.360177    0.887311    11.00000    0.18325    0.09177 =
        0.05530   -0.00453   -0.01846   -0.06703
AFIX   23
H44C  2    1.300065    0.375285    0.844391    11.00000   -1.20000
H44D  2    1.320728    0.361146    0.931625    11.00000   -1.20000
AFIX    0
C443  1    1.180504    0.377898    0.913700    11.00000    0.26733    0.07356 =
        0.10357   -0.03401   -0.03116    0.01523
PART    1
AFIX   23
H44E  2    1.137948    0.376278    0.867861    21.00000   -1.20000
H44F  2    1.156510    0.360838    0.953465    21.00000   -1.20000
PART    2
H44J  2    1.151402    0.362796    0.954252   -21.00000   -1.20000
H44K  2    1.137039    0.381862    0.869129   -21.00000   -1.20000
AFIX    0
PART    1
C444  1    1.171594    0.416041    0.944945    21.00000    0.14231
AFIX   33
H44G  2    1.107748    0.420784    0.956833    21.00000   -1.50000
H44H  2    1.191342    0.434137    0.906183    21.00000   -1.50000
H44I  2    1.209772    0.418541    0.992576    21.00000   -1.50000
AFIX    0
PART    2
C445  1    1.221884    0.416651    0.947595   -21.00000    0.14231
AFIX   33
H44L  2    1.172432    0.431992    0.967402   -21.00000   -1.50000
H44M  2    1.251940    0.430142    0.905972   -21.00000   -1.50000
H44N  2    1.266379    0.411326    0.989973   -21.00000   -1.50000
AFIX    0
PART    0
C45   1    1.208817    0.253111    0.786472    11.00000    0.03244    0.06117 =
        0.04760    0.00572    0.00783   -0.00522
AFIX   43
H45   2    1.241748    0.251395    0.834908    11.00000   -1.20000
AFIX    0
C46   1    1.184471    0.220259    0.746439    11.00000    0.03053    0.05549 =
        0.05307    0.00423    0.00979    0.00202
AFIX   43
H46   2    1.201071    0.196844    0.768699    11.00000   -1.20000
AFIX    0
C47   1    1.137624    0.220957    0.676429    11.00000    0.03124    0.04582 =
        0.04917    0.00845    0.01191   -0.00400
O47   4    1.112753    0.190217    0.632129    11.00000    0.05262    0.03763 =
        0.06047    0.00801   -0.00409   -0.00075
C471  1    1.140789    0.154550    0.663022    11.00000    0.06730    0.04239 =
        0.06734    0.01467   -0.00516   -0.00011
AFIX   23
H47A  2    1.108830    0.149085    0.711573    11.00000   -1.20000
H47B  2    1.207343    0.154351    0.674701    11.00000   -1.20000
AFIX    0
C472  1    1.115467    0.125211    0.599632    11.00000    0.09126    0.04418 =
        0.12154    0.00969    0.00120    0.00695
PART    1
AFIX   23
H47C  2    1.137773    0.133908    0.548993    21.00000   -1.20000
H47D  2    1.146770    0.101424    0.612702    21.00000   -1.20000
PART    2
H47J  2    1.126607    0.100234    0.622735   -21.00000   -1.20000
H47K  2    1.048988    0.127206    0.588468   -21.00000   -1.20000
AFIX    0
PART    1
C473  1    1.019636    0.118603    0.592068    21.00000    0.12147    0.05050 =
        0.20068    0.02190    0.03976    0.01784
AFIX   23
H47E  2    0.986337    0.142039    0.579877    21.00000   -1.20000
H47F  2    0.996222    0.107897    0.640624    21.00000   -1.20000
AFIX    0
C474  1    1.009062    0.090381    0.523768    21.00000    0.21633    0.10118 =
        0.14249   -0.04636   -0.09273    0.01214
AFIX   33
H47G  2    1.044860    0.098936    0.480044    21.00000   -1.50000
H47H  2    0.944636    0.088601    0.507153    21.00000   -1.50000
H47I  2    1.031017    0.065793    0.540994    21.00000   -1.50000
AFIX    0
PART    2
C475  1    1.159070    0.126096    0.526905   -21.00000    0.09016
AFIX   23
H47L  2    1.225850    0.127769    0.536664   -21.00000   -1.20000
H47M  2    1.139409    0.148831    0.498182   -21.00000   -1.20000
AFIX    0
C476  1    1.137664    0.091192    0.474965   -21.00000    0.09618
AFIX   33
H47N  2    1.144674    0.068492    0.506452   -21.00000   -1.50000
H47O  2    1.179980    0.090381    0.432053   -21.00000   -1.50000
H47P  2    1.074906    0.092798    0.453797   -21.00000   -1.50000
AFIX    0
PART    0
C47A  1    1.113716    0.256340    0.645310    11.00000    0.02615    0.04637 =
        0.05046   -0.00061    0.01342   -0.00386
C4    1    1.113865    0.357836    0.659793    11.00000    0.04664    0.04002 =
        0.06312   -0.00771    0.00411   -0.00398
AFIX  137
H4A   2    1.177628    0.365058    0.653439    11.00000   -1.50000
H4B   2    1.097077    0.362303    0.713735    11.00000   -1.50000
H4C   2    1.074442    0.372702    0.624575    11.00000   -1.50000
AFIX    0
C5    1    0.520455    0.449299    0.634993    11.00000    0.06637    0.03903 =
        0.06479   -0.01109    0.01379   -0.00452
AFIX  137
H5A   2    0.477895    0.440128    0.673388    11.00000   -1.50000
H5B   2    0.547476    0.472880    0.653252    11.00000   -1.50000
H5C   2    0.568823    0.430819    0.628243    11.00000   -1.50000
AFIX    0
N61   3    0.472048    0.455302    0.561413    11.00000    0.04219    0.02914 =
        0.05872   -0.00743    0.01469   -0.00785
C62   1    0.487443    0.436367    0.495762    11.00000    0.03278    0.02694 =
        0.06128   -0.00741    0.02081   -0.00764
N63   3    0.427553    0.449482    0.440892    11.00000    0.03133    0.03052 =
        0.05926   -0.00767    0.01150   -0.00163
C63A  1    0.372671    0.477137    0.472478    11.00000    0.03543    0.02758 =
        0.07069   -0.00914    0.02389   -0.00633
C64   1    0.304817    0.500803    0.437590    11.00000    0.03914    0.03199 =
        0.08565   -0.00410    0.02082   -0.00183
O64   4    0.286680    0.497207    0.360348    11.00000    0.05595    0.05059 =
        0.09059   -0.00797    0.00068    0.01719
C641  1    0.222628    0.523566    0.324057    11.00000    0.07792    0.07423 =
        0.10789    0.00184   -0.00313    0.03680
AFIX   23
H64A  2    0.242153    0.549548    0.335078    11.00000   -1.20000
H64B  2    0.160845    0.519914    0.344270    11.00000   -1.20000
AFIX    0
C642  1    0.222348    0.516089    0.239079    11.00000    0.15335    0.16578 =
        0.10603    0.00777   -0.01615    0.10769
PART    1
AFIX   23
H64C  2    0.194008    0.491268    0.230619    21.00000   -1.20000
H64D  2    0.180985    0.534604    0.213703    21.00000   -1.20000
PART    2
H64J  2    0.171273    0.531688    0.218540   -21.00000   -1.20000
H64K  2    0.278283    0.528860    0.222415   -21.00000   -1.20000
AFIX    0
PART    1
C643  1    0.306628    0.516411    0.196863    21.00000    0.09454
AFIX   23
H64E  2    0.348056    0.497581    0.221076    21.00000   -1.20000
H64F  2    0.335652    0.541121    0.205035    21.00000   -1.20000
AFIX    0
C644  1    0.301297    0.509107    0.111651    21.00000    0.13745
AFIX   33
H64N  2    0.259042    0.526896    0.086383    21.00000   -1.50000
H64O  2    0.279372    0.483606    0.102195    21.00000   -1.50000
H64P  2    0.361962    0.512002    0.090201    21.00000   -1.50000
AFIX    0
PART    2
C645  1    0.218126    0.486638    0.194234   -21.00000    0.16773
AFIX   23
H64L  2    0.156606    0.475528    0.197819   -21.00000   -1.20000
H64M  2    0.262618    0.468054    0.214967   -21.00000   -1.20000
AFIX    0
C646  1    0.236907    0.493188    0.107069   -21.00000    0.13047
AFIX   33
H64G  2    0.203084    0.474783    0.075296   -21.00000   -1.50000
H64H  2    0.302357    0.490531    0.098736   -21.00000   -1.50000
H64I  2    0.217156    0.518394    0.092050   -21.00000   -1.50000
AFIX    0
PART    0
C65   1    0.264498    0.525669    0.488217    11.00000    0.03912    0.03050 =
        0.09868   -0.00244    0.02751   -0.00229
AFIX   43
H65   2    0.217780    0.541755    0.468325    11.00000   -1.20000
AFIX    0
C66   1    0.289727    0.527911    0.566424    11.00000    0.05070    0.03240 =
        0.09863   -0.01428    0.03736   -0.00642
AFIX   43
H66   2    0.259010    0.545128    0.598444    11.00000   -1.20000
AFIX    0
C67   1    0.358172    0.505922    0.599523    11.00000    0.04886    0.03920 =
        0.07577   -0.01758    0.03253   -0.01653
O67   4    0.392021    0.507197    0.673684    11.00000    0.07798    0.05436 =
        0.07662   -0.02458    0.03694   -0.00455
C671  1    0.340586    0.528474    0.728446    11.00000    0.09066    0.05414 =
        0.08418   -0.02549    0.05036   -0.00898
AFIX   23
H67A  2    0.275420    0.521261    0.724939    11.00000   -1.20000
H67B  2    0.345404    0.555504    0.717249    11.00000   -1.20000
AFIX    0
C672  1    0.379826    0.520090    0.807075    11.00000    0.10647    0.12401 =
        0.08201   -0.04322    0.02771    0.00810
PART    1
AFIX   23
H67C  2    0.352105    0.536941    0.845357    21.00000   -1.20000
H67D  2    0.446213    0.525132    0.807816    21.00000   -1.20000
PART    2
H67J  2    0.346296    0.534987    0.845322   -21.00000   -1.20000
H67K  2    0.368211    0.493437    0.818374   -21.00000   -1.20000
AFIX    0
PART    1
C673  1    0.364423    0.480386    0.831045    21.00000    0.09846
AFIX   23
H67E  2    0.298340    0.474712    0.828070    21.00000   -1.20000
H67F  2    0.395511    0.463342    0.795134    21.00000   -1.20000
AFIX    0
C674  1    0.400583    0.474419    0.911941    21.00000    0.15920
AFIX   33
H67G  2    0.463453    0.483620    0.916605    21.00000   -1.50000
H67H  2    0.399458    0.447704    0.924203    21.00000   -1.50000
H67I  2    0.362683    0.488000    0.948355    21.00000   -1.50000
AFIX    0
PART    2
C675  1    0.477043    0.527132    0.820148   -21.00000    0.09255
AFIX   23
H67L  2    0.487853    0.554217    0.813583   -21.00000   -1.20000
H67M  2    0.510332    0.514048    0.779034   -21.00000   -1.20000
AFIX    0
C676  1    0.517532    0.515625    0.897216   -21.00000    0.13537
AFIX   33
H67N  2    0.473053    0.500767    0.925163   -21.00000   -1.50000
H67O  2    0.533782    0.537896    0.927783   -21.00000   -1.50000
H67P  2    0.572377    0.500647    0.889362   -21.00000   -1.50000
AFIX    0
PART    0
C67A  1    0.400373    0.480429    0.548139    11.00000    0.04300    0.02302 =
        0.07443   -0.00875    0.02827   -0.00898
C6    1    0.411028    0.430138    0.365638    11.00000    0.03661    0.04769 =
        0.05350   -0.00662    0.01167    0.00457
AFIX   23
H6A   2    0.468888    0.419401    0.347750    11.00000   -1.20000
H6B   2    0.388409    0.448245    0.325960    11.00000   -1.20000
AFIX    0
C71   1    0.363754    0.361122    0.364592    11.00000    0.03099    0.04918 =
        0.04621   -0.01274    0.00533    0.00591
C72   1    0.340871    0.399064    0.374697    11.00000    0.03393    0.04573 =
        0.06381   -0.01878    0.00037    0.00890
C73   1    0.252807    0.408046    0.394851    11.00000    0.03579    0.04937 =
        0.11010   -0.03589    0.00444    0.00575
AFIX   43
H73   2    0.236351    0.433549    0.400203    11.00000   -1.20000
AFIX    0
C74   1    0.188596    0.380769    0.407294    11.00000    0.02676    0.05974 =
        0.14587   -0.04316    0.01527   -0.00380
AFIX   43
H74   2    0.128501    0.387595    0.420597    11.00000   -1.20000
AFIX    0
C75   1    0.211040    0.344278    0.400587    11.00000    0.02312    0.05642 =
        0.11533   -0.03252    0.01250   -0.00506
AFIX   43
H75   2    0.167336    0.325521    0.411080    11.00000   -1.20000
AFIX    0
C76   1    0.297465    0.334248    0.378490    11.00000    0.02738    0.04358 =
        0.07059   -0.02315    0.00806   -0.00119
AFIX   43
H76   2    0.311944    0.308567    0.372670    11.00000   -1.20000
AFIX    0
C7    1    0.457673    0.350181    0.339482    11.00000    0.02759    0.04288 =
        0.05391   -0.00903    0.00847    0.00515
AFIX   23
H7A   2    0.467358    0.360492    0.286937    11.00000   -1.20000
H7B   2    0.503738    0.361504    0.375712    11.00000   -1.20000
AFIX    0
N81   3    0.471861    0.309891    0.337626    11.00000    0.03035    0.04790 =
        0.05200   -0.01457    0.00727    0.00610
C82   1    0.511389    0.290631    0.396747    11.00000    0.02416    0.04706 =
        0.04579   -0.01407    0.00391    0.00326
N83   3    0.499799    0.253759    0.376261    11.00000    0.03289    0.04594 =
        0.05225   -0.00437    0.01717    0.00719
C83A  1    0.455042    0.250784    0.304239    11.00000    0.02508    0.06790 =
        0.05817   -0.01524    0.01602    0.00457
C84   1    0.425449    0.219013    0.258820    11.00000    0.03553    0.05332 =
        0.07034   -0.01725    0.02067    0.01074
O84   4    0.441826    0.184946    0.290673    11.00000    0.04795    0.06240 =
        0.08048   -0.02552    0.02027   -0.00238
C841  1    0.396936    0.154038    0.249571    11.00000    0.06413    0.07098 =
        0.08288   -0.02892    0.02198   -0.01106
AFIX   23
H84A  2    0.420872    0.151581    0.196618    11.00000   -1.20000
H84B  2    0.330402    0.158564    0.244731    11.00000   -1.20000
AFIX    0
C842  1    0.415388    0.119755    0.294586    11.00000    0.07728    0.06978 =
        0.08688   -0.02057    0.03344   -0.00908
AFIX   23
H84C  2    0.482252    0.116255    0.300009    11.00000   -1.20000
H84D  2    0.390156    0.098231    0.264814    11.00000   -1.20000
AFIX    0
C843  1    0.376266    0.119485    0.374707    11.00000    0.09539    0.07613 =
        0.11088   -0.02880    0.04280   -0.02317
PART    1
AFIX   23
H84E  2    0.395406    0.095927    0.400592    21.00000   -1.20000
H84F  2    0.404951    0.140183    0.404851    21.00000   -1.20000
PART    2
H84J  2    0.406216    0.139112    0.407085   -21.00000   -1.20000
H84K  2    0.310233    0.125171    0.370485   -21.00000   -1.20000
AFIX    0
PART    1
C844  1    0.275170    0.122945    0.381111    21.00000    0.07981
AFIX   33
H84G  2    0.256789    0.148866    0.371209    21.00000   -1.50000
H84H  2    0.257894    0.115673    0.433594    21.00000   -1.50000
H84I  2    0.244590    0.106563    0.342728    21.00000   -1.50000
AFIX    0
PART    2
C845  1    0.388716    0.085929    0.409381   -21.00000    0.11178
AFIX   33
H84L  2    0.454172    0.080795    0.415728   -21.00000   -1.50000
H84M  2    0.359797    0.066451    0.376988   -21.00000   -1.50000
H84N  2    0.361212    0.086200    0.460579   -21.00000   -1.50000
AFIX    0
PART    0
C85   1    0.383397    0.227131    0.189113    11.00000    0.03960    0.08908 =
        0.05999   -0.03096    0.00861    0.00721
AFIX   43
H85   2    0.365008    0.206898    0.156452    11.00000   -1.20000
AFIX    0
C86   1    0.365687    0.263025    0.162732    11.00000    0.04664    0.09898 =
        0.06363   -0.03182    0.00877    0.02390
AFIX   43
H86   2    0.336299    0.266530    0.113149    11.00000   -1.20000
AFIX    0
C87   1    0.390106    0.294025    0.207443    11.00000    0.04681    0.08701 =
        0.05335   -0.02675    0.00469    0.01790
O87   4    0.374071    0.329395    0.187509    11.00000    0.09701    0.09216 =
        0.06097   -0.01597   -0.01416    0.05733
C871  1    0.318423    0.335801    0.118908    11.00000    0.14644    0.14267 =
        0.07266   -0.02865   -0.02968    0.06630
PART    1
AFIX   23
H87A  2    0.347455    0.356470    0.090580    21.00000   -1.20000
H87B  2    0.324131    0.313266    0.086060    21.00000   -1.20000
PART    2
H87J  2    0.339044    0.319970    0.075662   -21.00000   -1.20000
H87K  2    0.322668    0.362284    0.102917   -21.00000   -1.20000
AFIX    0
PART    1
C872  1    0.229572    0.343766    0.119816    21.00000    0.16955
AFIX   23
H87C  2    0.195467    0.323428    0.144838    21.00000   -1.20000
H87D  2    0.204151    0.347535    0.066280    21.00000   -1.20000
AFIX    0
C873  1    0.224262    0.381334    0.169179    21.00000    0.18394
AFIX   23
H87E  2    0.253082    0.378110    0.221686    21.00000   -1.20000
H87F  2    0.254553    0.402191    0.142445    21.00000   -1.20000
AFIX    0
C874  1    0.128260    0.387879    0.173765    21.00000    0.15408
AFIX   33
H87G  2    0.118080    0.411696    0.200179    21.00000   -1.50000
H87H  2    0.100508    0.367627    0.203145    21.00000   -1.50000
H87I  2    0.100505    0.388794    0.121108    21.00000   -1.50000
AFIX    0
PART    2
C875  1    0.215470    0.325619    0.138827   -21.00000    0.16955
AFIX   23
H87L  2    0.178245    0.325410    0.089679   -21.00000   -1.20000
H87M  2    0.214542    0.300025    0.160554   -21.00000   -1.20000
AFIX    0
C876  1    0.170131    0.352150    0.196595   -21.00000    0.05429
AFIX   23
H87N  2    0.106179    0.344091    0.202541   -21.00000   -1.20000
H87O  2    0.201963    0.349606    0.248054   -21.00000   -1.20000
AFIX    0
C877  1    0.170225    0.392649    0.173744   -21.00000    0.15408
AFIX   33
H87P  2    0.139501    0.407349    0.213205   -21.00000   -1.50000
H87Q  2    0.137969    0.395675    0.123255   -21.00000   -1.50000
H87R  2    0.233268    0.401335    0.169871   -21.00000   -1.50000
AFIX    0
PART    0
C87A  1    0.437284    0.286450    0.278121    11.00000    0.04991
C8    1    0.534486    0.223468    0.423415    11.00000    0.03993    0.05193 =
        0.06795    0.00099    0.01925    0.00889
AFIX  137
H8A   2    0.575519    0.233315    0.464676    11.00000   -1.50000
H8B   2    0.568015    0.206079    0.390892    11.00000   -1.50000
H8C   2    0.483583    0.210349    0.446841    11.00000   -1.50000
AFIX    0
PART    1
N101  3    0.016053    0.089923    0.313113    21.00000    0.22385    0.12252 =
        0.10193   -0.04721    0.04049   -0.07462
C101  1    0.028149    0.120996    0.311602    21.00000    0.10656    0.08609 =
        0.08415   -0.01613    0.01439   -0.03714
C102  1    0.053711    0.158551    0.313184    21.00000    0.14153    0.07709 =
        0.07902   -0.01090    0.00122   -0.00371
AFIX   33
H10A  2    0.092846    0.163323    0.359472    21.00000   -1.50000
H10B  2   -0.000937    0.174234    0.314874    21.00000   -1.50000
H10C  2    0.087163    0.164453    0.266314    21.00000   -1.50000
AFIX    0
PART    2
N201  3   -0.035906    0.159437    0.427671   -21.00000    0.09087    0.13076 =
        0.08776    0.00530    0.02447    0.01028
C201  1    0.012654    0.158266    0.375478   -21.00000    0.08089    0.05765 =
        0.05112   -0.00873    0.00133    0.02355
C202  1    0.053711    0.158551    0.313184   -21.00000    0.14153    0.07709 =
        0.07902   -0.01090    0.00122   -0.00371
AFIX   33
H20A  2    0.009368    0.160053    0.269337   -21.00000   -1.50000
H20B  2    0.089604    0.135605    0.308953   -21.00000   -1.50000
H20C  2    0.094462    0.180218    0.312249   -21.00000   -1.50000
AFIX    0
HKLF    4
END

;
 
#===END


 
#------------------  SECTION 2. COMPOUND(S) DETAILS -------------------------#
 
data_ps295b

_database_code_depnum_ccdc_archive  '1008899'

 
_audit_creation_date                    2014-06-05T10:08:49-00:00
_audit_creation_method                  'WinGX routine CIF_UPDATE'
 
#----------------------------------------------------------------------------#
#                   CHEMICAL INFORMATION                                     #
#----------------------------------------------------------------------------#
 
_chemical_name_systematic
;
 ?
;
_chemical_formula_sum                   'C40 H58 Cl2 N4 O5'
_chemical_formula_moiety                'C40 H56 N4 O4, 2(Cl), H2 O'
_chemical_formula_weight                745.8
 
#----------------------------------------------------------------------------#
#                   UNIT CELL INFORMATION                                    #
#----------------------------------------------------------------------------#
 
_symmetry_cell_setting                  monoclinic
_symmetry_space_group_name_H-M          'C 1 2/c 1'
_symmetry_space_group_name_Hall         '-c 2yc'
loop_
    _symmetry_equiv_pos_as_xyz
'x, y, z'
'-x, y, -z+1/2'
'x+1/2, y+1/2, z'
'-x+1/2, y+1/2, -z+1/2'
'-x, -y, -z'
'x, -y, z-1/2'
'-x+1/2, -y+1/2, -z'
'x+1/2, -y+1/2, z-1/2'
 
_cell_length_a                          31.1544(15)
_cell_length_b                          15.0002(8)
_cell_length_c                          17.3313(8)
_cell_angle_alpha                       90
_cell_angle_beta                        98.312(5)
_cell_angle_gamma                       90
_cell_volume                            8014.2(7)
_cell_formula_units_Z                   8
_cell_measurement_temperature           100(2)
_cell_measurement_reflns_used           3596
_cell_measurement_theta_min             2.8676
_cell_measurement_theta_max             67.0569
 
#----------------------------------------------------------------------------#
#                   CRYSTAL INFORMATION                                      #
#----------------------------------------------------------------------------#
 
_exptl_crystal_description              rod
_exptl_crystal_colour                   colourless
_exptl_crystal_size_max                 0.32
_exptl_crystal_size_mid                 0.04
_exptl_crystal_size_min                 0.03
_exptl_crystal_density_diffrn           1.236
_exptl_crystal_density_method           'not measured'
_exptl_crystal_F_000                    3200
_exptl_special_details
;
 ?
;
 
#----------------------------------------------------------------------------#
#                   ABSORPTION CORRECTION                                    #
#----------------------------------------------------------------------------#
 
_exptl_absorpt_coefficient_mu           1.829
_exptl_absorpt_correction_type          multi-scan
_exptl_absorpt_process_details
;
      CrysAlis RED, Oxford Diffraction Ltd.,
        Empirical absorption correction using spherical harmonics,
 implemented in SCALE3 ABSPACK scaling algorithm.

;
_exptl_absorpt_correction_T_min         0.79778
_exptl_absorpt_correction_T_max         1
 
#----------------------------------------------------------------------------#
#                   DATA COLLECTION                                          #
#----------------------------------------------------------------------------#
 
_diffrn_ambient_temperature             100(2)
_diffrn_radiation_wavelength            1.54178
_diffrn_radiation_type                  CuK\a
_diffrn_radiation_monochromator         graphite
_diffrn_detector_area_resol_mean        10.4738
_diffrn_orient_matrix_ub_11             0.0197208363
_diffrn_orient_matrix_ub_12             0.0812422511
_diffrn_orient_matrix_ub_13             -0.0362846643
_diffrn_orient_matrix_ub_21             -0.0375188042
_diffrn_orient_matrix_ub_22             0.0584689934
_diffrn_orient_matrix_ub_23             0.0194813516
_diffrn_orient_matrix_ub_31             0.0262607879
_diffrn_orient_matrix_ub_32             0.0226768746
_diffrn_orient_matrix_ub_33             0.0797708847
_diffrn_measurement_device_type   'Oxford Diffraction Gemini diffractometer'
_diffrn_measurement_method              '\w scans'
_diffrn_reflns_av_R_equivalents         0.0614
_diffrn_reflns_av_unetI/netI            0.0661
_diffrn_reflns_number                   23411
_diffrn_reflns_limit_h_min              -33
_diffrn_reflns_limit_h_max              37
_diffrn_reflns_limit_k_min              -17
_diffrn_reflns_limit_k_max              17
_diffrn_reflns_limit_l_min              -15
_diffrn_reflns_limit_l_max              20
_diffrn_reflns_theta_min                2.87
_diffrn_reflns_theta_max                67.23
_diffrn_reflns_theta_full               67.23
_diffrn_measured_fraction_theta_full
                                        0.987
_diffrn_measured_fraction_theta_max
                                        0.987
_reflns_number_total                    7098
_reflns_number_gt                       3933
_reflns_threshold_expression            I>2\s(I)
 
#----------------------------------------------------------------------------#
#                   COMPUTER PROGRAMS USED                                   #
#----------------------------------------------------------------------------#
 
_computing_data_collection
;
        CrysAlisPro, Oxford Diffraction Ltd.,
        Version 1.171.33.52 (release 06-11-2009 CrysAlis171 .NET)
        (compiled Nov  6 2009,16:24:50)
;
_computing_cell_refinement
;
        CrysAlisPro, Oxford Diffraction Ltd.,
        Version 1.171.33.52 (release 06-11-2009 CrysAlis171 .NET)
        (compiled Nov  6 2009,16:24:50)
;
_computing_data_reduction
;
        CrysAlisPro, Oxford Diffraction Ltd.,
        Version 1.171.33.52 (release 06-11-2009 CrysAlis171 .NET)
        (compiled Nov  6 2009,16:24:50)
;
_computing_structure_refinement         'SHELXL-97 (Sheldrick, 2008)'
_computing_molecular_graphics           'Diamond (Brandenburg, K., (1999)'
_computing_publication_material        'WinGX Farrugia, L. J. (1999)'

 
#----------------------------------------------------------------------------#
#                   STRUCTURE SOLUTION
#----------------------------------------------------------------------------#
 
_atom_sites_solution_primary            direct
_atom_sites_solution_secondary          difmap
_atom_sites_solution_hydrogens          geom
 
#----------------------------------------------------------------------------#
#                   REFINEMENT INFORMATION                                   #
#----------------------------------------------------------------------------#
 
_refine_special_details
;
 Refinement of F^2^ against ALL reflections.  The weighted R-factor wR and
 goodness of fit S are based on F^2^, conventional R-factors R are based
 on F, with F set to zero for negative F^2^. The threshold expression of
 F^2^ > 2\s(F^2^) is used only for calculating R-factors(gt) etc. and is
 not relevant to the choice of reflections for refinement.  R-factors based
 on F^2^ are statistically about twice as large as those based on F, and R-
 factors based on ALL data will be even larger.

 One of the benzimidazolin-2-ylidene moieties was modelled as being disordered
 over two sets of sites with occupancies refined to 0.722(4) and its
 complement. Two atoms of another n-BuO group were also modelled as being 
disordered with similar occupancies. Non-hydrogen atoms of the minor 
components of the disordered atoms were refined with isotropic displacement
 parameters after anisotropic refinement resulted in unacceptable 
ellipsoids even with reasonable restraints. Geometries and some displacement
 parameters of the minor components were restrained to reasonable values. 
Water molecule H-atoms were also refined but with restrained geometries. 
The remaining H-atoms were added at calculated positions and refined by use 
of a riding model with isotropic displacement parameters based on those of
 the parent atom.


;
_refine_ls_structure_factor_coef        Fsqd
_refine_ls_matrix_type                  full
_refine_ls_weighting_scheme             calc
_refine_ls_weighting_details
         'calc w=1/[\s^2^(Fo^2^)+(0.0972P)^2^] where P=(Fo^2^+2Fc^2^)/3'
_refine_ls_hydrogen_treatment           mixed
_refine_ls_extinction_method            none
_refine_ls_number_reflns                7098
_refine_ls_number_parameters            568
_refine_ls_number_restraints            116
_refine_ls_R_factor_all                 0.1171
_refine_ls_R_factor_gt                  0.061
_refine_ls_wR_factor_ref                0.1821
_refine_ls_wR_factor_gt                 0.1545
_refine_ls_goodness_of_fit_ref          0.97
_refine_ls_restrained_S_all             0.993
_refine_ls_shift/su_max                 0
_refine_ls_shift/su_mean                0
_refine_diff_density_max                0.424
_refine_diff_density_min                -0.269
_refine_diff_density_rms                0.05
 
#----------------------------------------------------------------------------#
#                   ATOMIC TYPES, COORDINATES AND THERMAL PARAMETERS         #
#----------------------------------------------------------------------------#
 
loop_
    _atom_type_symbol
    _atom_type_description
    _atom_type_scat_dispersion_real
    _atom_type_scat_dispersion_imag
    _atom_type_scat_source
C C 0.0181 0.0091 'International Tables Vol C Tables 4.2.6.8 and 6.1.1.4'
H H 0 0 'International Tables Vol C Tables 4.2.6.8 and 6.1.1.4'
N N 0.0311 0.018 'International Tables Vol C Tables 4.2.6.8 and 6.1.1.4'
O O 0.0492 0.0322 'International Tables Vol C Tables 4.2.6.8 and 6.1.1.4'
Cl Cl 0.3639 0.7018 'International Tables Vol C Tables 4.2.6.8 and 6.1.1.4'
 
loop_
    _atom_site_label
    _atom_site_type_symbol
    _atom_site_fract_x
    _atom_site_fract_y
    _atom_site_fract_z
    _atom_site_U_iso_or_equiv
    _atom_site_adp_type
    _atom_site_occupancy
    _atom_site_symmetry_multiplicity
    _atom_site_calc_flag
    _atom_site_refinement_flags
    _atom_site_disorder_assembly
    _atom_site_disorder_group
C1 C 0.4304(3) 0.3085(4) 0.6888(6) 0.0470(15) Uani 0.722(4) 1 d PD A 1
H1A H 0.4329 0.2937 0.6345 0.07 Uiso 0.722(4) 1 calc PR A 1
H1B H 0.404 0.2818 0.703 0.07 Uiso 0.722(4) 1 calc PR A 1
H1C H 0.4557 0.2852 0.723 0.07 Uiso 0.722(4) 1 calc PR A 1
C5 C 0.4365(9) 0.3376(11) 0.6840(17) 0.0470(15) Uani 0.278(4) 1 d PD A 2
H5A H 0.4667 0.3203 0.7009 0.07 Uiso 0.278(4) 1 calc PR A 2
H5B H 0.4289 0.3263 0.628 0.07 Uiso 0.278(4) 1 calc PR A 2
H5C H 0.4174 0.3026 0.7127 0.07 Uiso 0.278(4) 1 calc PR A 2
N21 N 0.40592(19) 0.5365(4) 0.7276(4) 0.0396(17) Uani 0.722(4) 1 d PD A 1
C22 C 0.3987(4) 0.4483(6) 0.7301(8) 0.042(2) Uani 0.722(4) 1 d PD A 1
H22 H 0.3757 0.421 0.752 0.05 Uiso 0.722(4) 1 calc PR A 1
N23 N 0.4286(2) 0.4051(5) 0.6973(4) 0.0422(16) Uani 0.722(4) 1 d PD A 1
C23A C 0.45683(16) 0.4677(5) 0.6725(3) 0.0392(13) Uani 0.722(4) 1 d PD A 1
C24 C 0.49387(18) 0.4587(5) 0.6361(3) 0.0440(13) Uani 0.722(4) 1 d PD A 1
C25 C 0.51348(15) 0.5356(4) 0.6173(3) 0.0398(12) Uani 0.722(4) 1 d PD A 1
H25 H 0.5386 0.5315 0.5922 0.048 Uiso 0.722(4) 1 calc PR A 1
C26 C 0.49772(17) 0.6221(4) 0.6338(3) 0.0395(14) Uani 0.722(4) 1 d PD A 1
H26 H 0.5118 0.6741 0.6187 0.047 Uiso 0.722(4) 1 calc PR A 1
C27 C 0.46226(17) 0.6292(4) 0.6714(3) 0.0426(13) Uani 0.722(4) 1 d PD A 1
C27A C 0.44167(17) 0.5510(5) 0.6909(3) 0.0391(13) Uani 0.722(4) 1 d PD A 1
O24 O 0.50787(10) 0.3731(3) 0.62553(19) 0.0426(9) Uani 0.722(4) 1 d P A 1
C241 C 0.54358(16) 0.3640(4) 0.5817(3) 0.0450(12) Uani 0.722(4) 1 d P A 1
H24A H 0.57 0.392 0.6101 0.054 Uiso 0.722(4) 1 calc PR A 1
H24B H 0.5366 0.3932 0.5302 0.054 Uiso 0.722(4) 1 calc PR A 1
C242 C 0.55080(18) 0.2650(4) 0.5716(4) 0.0513(14) Uani 0.722(4) 1 d P A 1
H24C H 0.525 0.239 0.5395 0.062 Uiso 0.722(4) 1 calc PR A 1
H24D H 0.5542 0.2357 0.6233 0.062 Uiso 0.722(4) 1 calc PR A 1
C243 C 0.59071(17) 0.2462(4) 0.5329(3) 0.0589(15) Uani 0.722(4) 1 d P A 1
H24E H 0.6166 0.2717 0.565 0.071 Uiso 0.722(4) 1 calc PR A 1
H24F H 0.5874 0.2753 0.4811 0.071 Uiso 0.722(4) 1 calc PR A 1
C244 C 0.5973(2) 0.1458(4) 0.5231(3) 0.0662(17) Uani 0.722(4) 1 d P A 1
H24G H 0.6016 0.1172 0.5745 0.099 Uiso 0.722(4) 1 calc PR A 1
H24H H 0.6228 0.1357 0.4972 0.099 Uiso 0.722(4) 1 calc PR A 1
H24I H 0.5716 0.1204 0.4914 0.099 Uiso 0.722(4) 1 calc PR A 1
O27 O 0.44438(12) 0.7075(3) 0.6927(2) 0.0431(9) Uani 0.722(4) 1 d PU A 1
C271 C 0.4619(2) 0.7872(4) 0.6672(4) 0.0743(19) Uani 0.722(4) 1 d PU A 1
H27A H 0.4628 0.7856 0.6103 0.089 Uiso 0.722(4) 1 calc PR A 1
H27B H 0.4916 0.7976 0.6947 0.089 Uiso 0.722(4) 1 calc PR A 1
C272 C 0.4309(3) 0.8585(6) 0.6876(4) 0.093(3) Uani 0.722(4) 1 d PU A 1
H27C H 0.4382 0.9152 0.6633 0.112 Uiso 0.722(4) 1 calc PR A 1
H27D H 0.4012 0.8417 0.6637 0.112 Uiso 0.722(4) 1 calc PR A 1
C273 C 0.4305(3) 0.8744(5) 0.7708(4) 0.089(2) Uani 0.722(4) 1 d PU A 1
H27E H 0.46 0.892 0.7949 0.107 Uiso 0.722(4) 1 calc PR A 1
H27F H 0.4232 0.8179 0.7955 0.107 Uiso 0.722(4) 1 calc PR A 1
C274 C 0.3983(3) 0.9469(7) 0.7883(5) 0.112(3) Uani 0.722(4) 1 d PU A 1
H27G H 0.3702 0.9371 0.7557 0.167 Uiso 0.722(4) 1 calc PR A 1
H27H H 0.4095 1.0057 0.777 0.167 Uiso 0.722(4) 1 calc PR A 1
H27I H 0.3945 0.9439 0.8435 0.167 Uiso 0.722(4) 1 calc PR A 1
C2 C 0.37893(12) 0.6035(3) 0.7708(2) 0.0505(9) Uani 1 1 d . . .
H2A H 0.3636 0.5697 0.8076 0.061 Uiso 0.722(4) 1 calc PR A 1
H2B H 0.3991 0.6453 0.8018 0.061 Uiso 0.722(4) 1 calc PR A 1
H2C H 0.3636 0.569 0.8072 0.061 Uiso 0.278(4) 1 d PR A 2
H2D H 0.3989 0.6453 0.8022 0.061 Uiso 0.278(4) 1 d PR A 2
N51 N 0.3996(5) 0.5540(10) 0.7382(10) 0.028(4) Uiso 0.278(4) 1 d PDU A 2
C52 C 0.4005(9) 0.4645(12) 0.737(2) 0.028(6) Uiso 0.278(4) 1 d PDU A 2
H52 H 0.3812 0.4285 0.7615 0.033 Uiso 0.278(4) 1 calc PR A 2
N53 N 0.4312(5) 0.4310(9) 0.6994(10) 0.029(4) Uiso 0.278(4) 1 d PDU A 2
C53A C 0.4532(5) 0.5046(10) 0.6756(10) 0.035(4) Uiso 0.278(4) 1 d PDU A 2
C54 C 0.4893(5) 0.5083(11) 0.6368(8) 0.047(4) Uiso 0.278(4) 1 d PDU A 2
C55 C 0.5041(6) 0.5906(12) 0.6219(9) 0.034(4) Uiso 0.278(4) 1 d PDU A 2
H55 H 0.5287 0.5958 0.5957 0.041 Uiso 0.278(4) 1 calc PR A 2
C56 C 0.4835(4) 0.6702(11) 0.6446(7) 0.047(3) Uiso 0.278(4) 1 d PDU A 2
H56 H 0.4934 0.727 0.6302 0.056 Uiso 0.278(4) 1 calc PR A 2
C57 C 0.4505(5) 0.6646(10) 0.6860(9) 0.035(4) Uiso 0.278(4) 1 d PDU A 2
C57A C 0.4344(5) 0.5806(9) 0.7000(9) 0.032(4) Uiso 0.278(4) 1 d PDU A 2
O54 O 0.5063(4) 0.4303(11) 0.6187(6) 0.047(3) Uiso 0.278(4) 1 d PD A 2
C541 C 0.5412(4) 0.4348(9) 0.5722(8) 0.059(4) Uiso 0.278(4) 1 d PD A 2
H54A H 0.5677 0.4586 0.6038 0.071 Uiso 0.278(4) 1 calc PR A 2
H54B H 0.5331 0.475 0.5271 0.071 Uiso 0.278(4) 1 calc PR A 2
C542 C 0.5494(5) 0.3428(9) 0.5443(8) 0.060(4) Uiso 0.278(4) 1 d PD A 2
H54C H 0.5229 0.3215 0.511 0.072 Uiso 0.278(4) 1 calc PR A 2
H54D H 0.5728 0.346 0.5112 0.072 Uiso 0.278(4) 1 calc PR A 2
C543 C 0.5621(6) 0.2758(9) 0.6068(9) 0.054(5) Uiso 0.278(4) 1 d PD A 2
H54E H 0.5384 0.2705 0.6391 0.065 Uiso 0.278(4) 1 calc PR A 2
H54F H 0.5883 0.297 0.6409 0.065 Uiso 0.278(4) 1 calc PR A 2
C544 C 0.5712(6) 0.1840(9) 0.5749(10) 0.077(5) Uiso 0.278(4) 1 d PD A 2
H54G H 0.547 0.1662 0.5355 0.115 Uiso 0.278(4) 1 calc PR A 2
H54H H 0.5746 0.1405 0.6176 0.115 Uiso 0.278(4) 1 calc PR A 2
H54I H 0.5979 0.1863 0.5513 0.115 Uiso 0.278(4) 1 calc PR A 2
O57 O 0.4288(3) 0.7342(7) 0.7154(6) 0.046(3) Uiso 0.278(4) 1 d PD A 2
C571 C 0.4255(8) 0.8159(13) 0.6728(13) 0.108(9) Uiso 0.278(4) 1 d PD A 2
H57A H 0.4161 0.8037 0.6167 0.129 Uiso 0.278(4) 1 calc PR A 2
H57B H 0.4542 0.8454 0.6782 0.129 Uiso 0.278(4) 1 calc PR A 2
C572 C 0.3930(5) 0.8764(10) 0.7039(8) 0.070(5) Uiso 0.278(4) 1 d PD A 2
H57C H 0.3943 0.9355 0.679 0.084 Uiso 0.278(4) 1 calc PR A 2
H57D H 0.3636 0.852 0.6869 0.084 Uiso 0.278(4) 1 calc PR A 2
C574 C 0.4340(9) 0.9558(19) 0.8204(15) 0.145(11) Uiso 0.278(4) 1 d PD A 2
H57E H 0.4219 1.0162 0.8187 0.217 Uiso 0.278(4) 1 calc PR A 2
H57F H 0.4572 0.9531 0.7879 0.217 Uiso 0.278(4) 1 calc PR A 2
H57G H 0.4457 0.9405 0.8743 0.217 Uiso 0.278(4) 1 calc PR A 2
C573 C 0.3982(9) 0.890(2) 0.7897(12) 0.129(11) Uiso 0.278(4) 1 d PD A 2
H57H H 0.4048 0.8314 0.8156 0.155 Uiso 0.278(4) 1 calc PR A 2
H57I H 0.3704 0.9111 0.804 0.155 Uiso 0.278(4) 1 calc PR A 2
C31 C 0.32076(13) 0.7213(3) 0.7473(2) 0.0581(11) Uani 1 1 d . . .
C32 C 0.34588(12) 0.6570(2) 0.7165(2) 0.0507(9) Uani 1 1 d . A .
C33 C 0.33990(13) 0.6421(3) 0.6364(2) 0.0532(10) Uani 1 1 d . . .
H33 H 0.357 0.5986 0.6152 0.064 Uiso 1 1 calc R A .
C34 C 0.30896(15) 0.6907(3) 0.5869(3) 0.0634(12) Uani 1 1 d . A .
H34 H 0.3054 0.6809 0.5322 0.076 Uiso 1 1 calc R . .
C35 C 0.28397(16) 0.7521(3) 0.6176(3) 0.0738(14) Uani 1 1 d . . .
H35 H 0.2625 0.784 0.584 0.089 Uiso 1 1 calc R A .
C36 C 0.28947(15) 0.7684(3) 0.6969(3) 0.0700(13) Uani 1 1 d . A .
H36 H 0.272 0.8117 0.7174 0.084 Uiso 1 1 calc R . .
C3 C 0.32629(14) 0.7425(3) 0.8339(2) 0.0615(11) Uani 1 1 d . A .
H3A H 0.3551 0.7214 0.8589 0.074 Uiso 1 1 calc R . .
H3B H 0.3252 0.8079 0.8411 0.074 Uiso 1 1 calc R . .
N41 N 0.25742(13) 0.5927(2) 0.92235(18) 0.0645(10) Uani 1 1 d . A .
C42 C 0.29320(15) 0.6146(3) 0.8944(2) 0.0622(12) Uani 1 1 d . A .
H42 H 0.3166 0.575 0.8905 0.075 Uiso 1 1 calc R . .
N43 N 0.29207(11) 0.6998(2) 0.87233(19) 0.0616(10) Uani 1 1 d . . .
C43A C 0.25284(15) 0.7362(3) 0.8876(2) 0.0627(12) Uani 1 1 d . A .
C44 C 0.23486(15) 0.8227(3) 0.8783(3) 0.0680(13) Uani 1 1 d . . .
O44 O 0.25820(10) 0.8876(2) 0.84781(19) 0.0743(10) Uani 1 1 d . A .
C441 C 0.23498(16) 0.9685(3) 0.8238(3) 0.0809(16) Uani 1 1 d . . .
H44A H 0.2271 1 0.8699 0.097 Uiso 1 1 calc R A .
H44B H 0.208 0.9542 0.7885 0.097 Uiso 1 1 calc R . .
C442 C 0.26418(17) 1.0273(3) 0.7819(3) 0.0845(16) Uani 1 1 d . A .
H44C H 0.2765 0.9904 0.7431 0.101 Uiso 1 1 calc R . .
H44D H 0.2461 1.0742 0.7531 0.101 Uiso 1 1 calc R . .
C443 C 0.3009(2) 1.0715(4) 0.8338(3) 0.0988(19) Uani 1 1 d . . .
H44E H 0.3213 1.0255 0.8582 0.119 Uiso 1 1 calc R A .
H44F H 0.2894 1.1044 0.8759 0.119 Uiso 1 1 calc R . .
C444 C 0.3254(2) 1.1373(5) 0.7858(4) 0.133(3) Uani 1 1 d . A .
H44G H 0.3332 1.1066 0.7399 0.199 Uiso 1 1 calc R . .
H44H H 0.3518 1.1584 0.8183 0.199 Uiso 1 1 calc R . .
H44I H 0.3066 1.1882 0.7691 0.199 Uiso 1 1 calc R . .
C471 C 0.12908(18) 0.6079(4) 0.9897(3) 0.0998(19) Uani 1 1 d D . .
H47A H 0.1234 0.6668 1.0119 0.12 Uiso 0.722(4) 1 calc PR A 1
H47B H 0.1259 0.5625 1.03 0.12 Uiso 0.722(4) 1 calc PR A 1
H47J H 0.1232 0.665 1.0148 0.12 Uiso 0.278(4) 1 d PR A 2
H47K H 0.1244 0.5588 1.0258 0.12 Uiso 0.278(4) 1 d PR A 2
C472 C 0.0963(3) 0.5917(15) 0.9238(6) 0.095(4) Uani 0.722(4) 1 d PDU A 1
H47C H 0.1029 0.5364 0.8967 0.114 Uiso 0.722(4) 1 calc PR A 1
H47D H 0.0952 0.6419 0.8864 0.114 Uiso 0.722(4) 1 calc PR A 1
C473 C 0.0510(3) 0.5822(8) 0.9558(7) 0.131(4) Uani 0.722(4) 1 d PDU A 1
H47E H 0.0508 0.5284 0.9888 0.157 Uiso 0.722(4) 1 calc PR A 1
H47F H 0.0454 0.6351 0.9871 0.157 Uiso 0.722(4) 1 calc PR A 1
C474 C 0.0175(3) 0.5748(9) 0.8846(7) 0.154(4) Uani 0.722(4) 1 d PDU A 1
H47G H -0.0112 0.5675 0.9004 0.23 Uiso 0.722(4) 1 calc PR A 1
H47H H 0.024 0.5231 0.8537 0.23 Uiso 0.722(4) 1 calc PR A 1
H47I H 0.0179 0.6291 0.8532 0.23 Uiso 0.722(4) 1 calc PR A 1
C475 C 0.0982(6) 0.608(5) 0.9092(14) 0.095(4) Uani 0.278(4) 1 d PD A 2
H47L H 0.106 0.6592 0.8782 0.114 Uiso 0.278(4) 1 calc PR A 2
H47M H 0.1041 0.5529 0.8805 0.114 Uiso 0.278(4) 1 calc PR A 2
C476 C 0.0499(4) 0.6117(13) 0.9130(9) 0.060(4) Uiso 0.278(4) 1 d PD A 2
H47N H 0.0434 0.6685 0.9381 0.072 Uiso 0.278(4) 1 calc PR A 2
H47O H 0.0422 0.5625 0.9464 0.072 Uiso 0.278(4) 1 calc PR A 2
C477 C 0.0208(6) 0.6051(19) 0.8316(12) 0.110(8) Uiso 0.278(4) 1 d PD A 2
H47P H -0.0099 0.6051 0.8388 0.165 Uiso 0.278(4) 1 calc PR A 2
H47Q H 0.0274 0.5498 0.8057 0.165 Uiso 0.278(4) 1 calc PR A 2
H47R H 0.0265 0.6563 0.7994 0.165 Uiso 0.278(4) 1 calc PR A 2
C45 C 0.19429(16) 0.8326(3) 0.9020(3) 0.0746(15) Uani 1 1 d . A .
H45 H 0.1806 0.8893 0.8961 0.089 Uiso 1 1 calc R . .
C46 C 0.17294(16) 0.7634(4) 0.9338(2) 0.0731(14) Uani 1 1 d . . .
H46 H 0.1455 0.7748 0.9495 0.088 Uiso 1 1 calc R A .
C47 C 0.19014(16) 0.6787(4) 0.9435(2) 0.0701(13) Uani 1 1 d . A .
O47 O 0.17301(11) 0.6065(3) 0.97520(17) 0.0802(10) Uani 1 1 d . A .
C47A C 0.23103(15) 0.6682(3) 0.9196(2) 0.0646(13) Uani 1 1 d . . .
C4 C 0.24751(17) 0.5034(4) 0.9493(3) 0.0849(16) Uani 1 1 d . . .
H4A H 0.2727 0.4645 0.9485 0.127 Uiso 1 1 calc R A .
H4B H 0.2226 0.4789 0.9149 0.127 Uiso 1 1 calc R . .
H4C H 0.2406 0.5071 1.0026 0.127 Uiso 1 1 calc R . .
O1 O 0.36973(12) 0.5096(3) 1.02396(18) 0.0736(9) Uani 1 1 d D . .
Cl1 Cl 0.33137(3) 0.40812(6) 0.86137(6) 0.0558(3) Uani 1 1 d . . .
Cl2 Cl 0.41759(3) 0.67700(8) 0.96951(5) 0.0596(3) Uani 1 1 d . . .
H1AO H 0.3607(15) 0.475(3) 0.988(2) 0.079(18) Uiso 1 1 d D . .
H1BO H 0.3857(17) 0.549(3) 1.004(3) 0.12(2) Uiso 1 1 d D . .
 
loop_
    _atom_site_aniso_label
    _atom_site_aniso_U_11
    _atom_site_aniso_U_22
    _atom_site_aniso_U_33
    _atom_site_aniso_U_23
    _atom_site_aniso_U_13
    _atom_site_aniso_U_12
C1 0.052(3) 0.032(4) 0.056(3) 0.007(4) 0.005(2) 0.003(3)
C5 0.052(3) 0.032(4) 0.056(3) 0.007(4) 0.005(2) 0.003(3)
N21 0.036(3) 0.040(4) 0.043(3) -0.001(2) 0.008(2) 0.012(2)
C22 0.045(4) 0.038(4) 0.040(4) 0.000(4) -0.001(3) -0.002(3)
N23 0.042(3) 0.036(4) 0.047(3) 0.004(3) 0.0013(18) -0.003(3)
C23A 0.039(3) 0.034(3) 0.042(3) 0.002(3) -0.002(2) 0.004(3)
C24 0.042(3) 0.042(4) 0.046(3) -0.004(3) -0.001(2) 0.010(3)
C25 0.034(3) 0.037(3) 0.046(3) 0.002(2) 0.000(2) 0.002(2)
C26 0.036(3) 0.030(3) 0.052(3) 0.000(3) 0.005(2) 0.004(3)
C27 0.045(3) 0.035(3) 0.046(3) -0.006(2) 0.002(2) 0.003(3)
C27A 0.033(3) 0.037(3) 0.045(3) 0.000(3) 0.001(2) 0.007(3)
O24 0.0345(18) 0.038(2) 0.054(2) 0.0037(16) 0.0034(14) 0.0063(15)
C241 0.036(3) 0.051(3) 0.047(3) -0.003(2) 0.004(2) 0.006(2)
C242 0.049(3) 0.049(3) 0.054(4) -0.004(3) 0.003(3) 0.006(2)
C243 0.052(3) 0.064(4) 0.060(3) -0.011(3) 0.003(3) 0.011(3)
C244 0.073(4) 0.061(4) 0.063(3) -0.009(3) 0.003(3) 0.018(3)
O27 0.042(2) 0.036(2) 0.053(2) 0.0033(19) 0.0123(17) 0.0060(19)
C271 0.112(5) 0.046(3) 0.073(4) -0.005(3) 0.043(4) -0.001(3)
C272 0.157(7) 0.059(4) 0.080(4) 0.003(4) 0.074(4) 0.012(5)
C273 0.106(5) 0.074(4) 0.100(5) -0.032(4) 0.055(4) -0.028(4)
C274 0.134(6) 0.104(6) 0.113(6) -0.039(5) 0.074(5) -0.012(5)
C2 0.057(2) 0.041(2) 0.049(2) 0.0016(17) -0.0064(17) 0.0002(18)
C31 0.069(3) 0.041(2) 0.056(2) 0.0007(18) -0.015(2) 0.0022(19)
C32 0.058(2) 0.037(2) 0.052(2) 0.0029(17) -0.0098(17) -0.0033(17)
C33 0.062(2) 0.041(2) 0.052(2) 0.0048(17) -0.0065(18) -0.0053(18)
C34 0.082(3) 0.043(2) 0.056(2) 0.0055(19) -0.020(2) -0.001(2)
C35 0.088(3) 0.049(3) 0.071(3) 0.003(2) -0.033(2) 0.006(2)
C36 0.081(3) 0.045(2) 0.072(3) -0.004(2) -0.028(2) 0.012(2)
C3 0.067(3) 0.049(2) 0.062(2) -0.011(2) -0.013(2) 0.010(2)
N41 0.091(3) 0.062(2) 0.0384(16) -0.0029(16) 0.0028(17) 0.029(2)
C42 0.081(3) 0.062(3) 0.044(2) -0.0017(19) 0.010(2) 0.029(2)
N43 0.070(2) 0.057(2) 0.0519(18) -0.0146(16) -0.0115(17) 0.0268(18)
C43A 0.074(3) 0.060(3) 0.047(2) -0.018(2) -0.014(2) 0.018(2)
C44 0.070(3) 0.063(3) 0.062(2) -0.027(2) -0.020(2) 0.031(2)
O44 0.0709(19) 0.0490(19) 0.092(2) -0.0259(16) -0.0259(17) 0.0197(15)
C441 0.086(3) 0.050(3) 0.095(3) -0.019(3) -0.025(3) 0.027(3)
C442 0.107(4) 0.060(3) 0.074(3) -0.010(3) -0.029(3) 0.014(3)
C443 0.126(5) 0.086(4) 0.074(3) -0.005(3) -0.022(3) 0.012(4)
C444 0.130(6) 0.152(7) 0.104(5) 0.042(5) -0.029(4) -0.013(5)
C471 0.103(4) 0.108(5) 0.091(4) -0.033(3) 0.023(3) 0.025(4)
C472 0.099(4) 0.069(8) 0.123(5) -0.022(6) 0.035(4) 0.009(3)
C473 0.128(7) 0.114(7) 0.149(8) -0.044(6) 0.015(6) 0.014(5)
C474 0.153(8) 0.139(8) 0.170(8) -0.049(7) 0.029(7) 0.004(6)
C475 0.099(4) 0.069(8) 0.123(5) -0.022(6) 0.035(4) 0.009(3)
C45 0.082(3) 0.063(3) 0.068(3) -0.035(3) -0.024(2) 0.030(3)
C46 0.077(3) 0.087(4) 0.050(2) -0.024(2) -0.009(2) 0.027(3)
C47 0.088(3) 0.078(3) 0.039(2) -0.013(2) -0.007(2) 0.024(3)
O47 0.087(2) 0.099(3) 0.0554(16) -0.0054(18) 0.0144(16) 0.031(2)
C47A 0.075(3) 0.074(3) 0.0402(19) -0.019(2) -0.007(2) 0.034(3)
C4 0.103(4) 0.092(4) 0.066(3) 0.024(3) 0.036(3) 0.034(3)
O1 0.079(2) 0.087(3) 0.0568(18) 0.0060(19) 0.0141(17) 0.0048(19)
Cl1 0.0591(6) 0.0449(5) 0.0662(6) 0.0104(4) 0.0183(4) 0.0026(4)
Cl2 0.0548(5) 0.0781(7) 0.0460(5) -0.0068(5) 0.0072(4) 0.0134(5)
 
 
#----------------------------------------------------------------------------#
#                   MOLECULAR GEOMETRY                                       #
#----------------------------------------------------------------------------#
 
_geom_special_details
;
 All s.u.'s (except the s.u. in the dihedral angle between two l.s. planes)
 are estimated using the full covariance matrix.  The cell s.u.'s are taken
 into account individually in the estimation of s.u.'s in distances, angles
 and torsion angles; correlations between s.u.'s in cell parameters are only
 used when they are defined by crystal symmetry.  An approximate (isotropic)
 treatment of cell s.u.'s is used for estimating s.u.'s involving l.s. planes.
;
loop_
    _geom_bond_atom_site_label_1
    _geom_bond_atom_site_label_2
    _geom_bond_distance
    _geom_bond_site_symmetry_2
    _geom_bond_publ_flag
C1 N23 1.458(9) . ?
C5 N53 1.441(17) . ?
N21 C22 1.344(8) . ?
N21 C27A 1.378(7) . ?
N21 C2 1.568(7) . ?
C22 N23 1.327(8) . ?
N23 C23A 1.397(7) . ?
C23A C27A 1.388(9) . ?
C23A C24 1.399(8) . ?
C24 C25 1.367(8) . ?
C24 O24 1.377(8) . ?
C25 C26 1.430(8) . ?
C26 C27 1.366(8) . ?
C27 O27 1.373(7) . ?
C27 C27A 1.401(7) . ?
O24 C241 1.442(6) . ?
C241 C242 1.516(8) . ?
C242 C243 1.522(8) . ?
C243 C244 1.532(9) . ?
O27 C271 1.412(7) . ?
C271 C272 1.517(10) . ?
C272 C273 1.464(10) . ?
C273 C274 1.540(12) . ?
C2 N51 1.178(14) . ?
C2 C32 1.520(5) . ?
N51 C52 1.343(15) . ?
N51 C57A 1.409(14) . ?
C52 N53 1.334(15) . ?
N53 C53A 1.393(14) . ?
C53A C57A 1.376(15) . ?
C53A C54 1.392(15) . ?
C54 O54 1.340(14) . ?
C54 C55 1.355(17) . ?
C55 C56 1.436(16) . ?
C56 C57 1.341(16) . ?
C57 O57 1.382(15) . ?
C57 C57A 1.390(15) . ?
O54 C541 1.446(14) . ?
C541 C542 1.498(14) . ?
C542 C543 1.489(15) . ?
C543 C544 1.526(15) . ?
O57 C571 1.427(17) . ?
C571 C572 1.516(17) . ?
C572 C573 1.485(17) . ?
C574 C573 1.528(19) . ?
C31 C32 1.395(6) . ?
C31 C36 1.402(5) . ?
C31 C3 1.520(6) . ?
C32 C33 1.392(5) . ?
C33 C34 1.399(5) . ?
C34 C35 1.362(7) . ?
C35 C36 1.384(7) . ?
C3 N43 1.482(6) . ?
N41 C42 1.320(6) . ?
N41 C47A 1.396(5) . ?
N41 C4 1.466(6) . ?
C42 N43 1.332(6) . ?
N43 C43A 1.399(5) . ?
C43A C47A 1.385(7) . ?
C43A C44 1.413(6) . ?
C44 O44 1.365(6) . ?
C44 C45 1.392(7) . ?
O44 C441 1.443(5) . ?
C441 C442 1.525(8) . ?
C442 C443 1.504(7) . ?
C443 C444 1.559(9) . ?
C471 O47 1.427(6) . ?
C471 C472 1.439(11) . ?
C471 C475 1.576(18) . ?
C472 C473 1.597(12) . ?
C473 C474 1.501(11) . ?
C475 C476 1.518(19) . ?
C476 C477 1.567(16) . ?
C45 C46 1.391(7) . ?
C46 C47 1.379(7) . ?
C47 O47 1.358(6) . ?
C47 C47A 1.404(7) . ?
 
loop_
    _geom_angle_atom_site_label_1
    _geom_angle_atom_site_label_2
    _geom_angle_atom_site_label_3
    _geom_angle
    _geom_angle_site_symmetry_1
    _geom_angle_site_symmetry_3
    _geom_angle_publ_flag
C22 N21 C27A 108.7(6) . . ?
C22 N21 C2 120.8(5) . . ?
C27A N21 C2 130.1(5) . . ?
N23 C22 N21 109.7(7) . . ?
C22 N23 C23A 108.3(6) . . ?
C22 N23 C1 124.7(6) . . ?
C23A N23 C1 127.0(5) . . ?
C27A C23A N23 106.6(5) . . ?
C27A C23A C24 121.3(6) . . ?
N23 C23A C24 132.1(6) . . ?
C25 C24 O24 126.4(6) . . ?
C25 C24 C23A 116.9(7) . . ?
O24 C24 C23A 116.6(5) . . ?
C24 C25 C26 122.6(5) . . ?
C27 C26 C25 119.4(5) . . ?
C26 C27 O27 125.7(5) . . ?
C26 C27 C27A 118.6(6) . . ?
O27 C27 C27A 115.7(5) . . ?
N21 C27A C23A 106.7(5) . . ?
N21 C27A C27 132.2(7) . . ?
C23A C27A C27 121.0(5) . . ?
C24 O24 C241 116.3(4) . . ?
O24 C241 C242 107.0(4) . . ?
C241 C242 C243 112.1(5) . . ?
C242 C243 C244 111.2(5) . . ?
C27 O27 C271 116.7(4) . . ?
O27 C271 C272 103.6(6) . . ?
C273 C272 C271 116.1(8) . . ?
C272 C273 C274 114.1(8) . . ?
N51 C2 C32 113.9(9) . . ?
C32 C2 N21 113.9(4) . . ?
C2 N51 C52 130.5(12) . . ?
C2 N51 C57A 123.9(12) . . ?
C52 N51 C57A 105.0(13) . . ?
N53 C52 N51 113.6(14) . . ?
C52 N53 C53A 105.4(12) . . ?
C52 N53 C5 124.5(14) . . ?
C53A N53 C5 129.9(13) . . ?
C57A C53A C54 121.6(13) . . ?
C57A C53A N53 108.4(11) . . ?
C54 C53A N53 129.9(14) . . ?
O54 C54 C55 126.5(14) . . ?
O54 C54 C53A 116.9(13) . . ?
C55 C54 C53A 116.7(14) . . ?
C54 C55 C56 121.9(14) . . ?
C57 C56 C55 120.1(14) . . ?
C56 C57 O57 127.3(13) . . ?
C56 C57 C57A 118.3(15) . . ?
O57 C57 C57A 114.4(12) . . ?
C53A C57A C57 121.2(12) . . ?
C53A C57A N51 107.5(11) . . ?
C57 C57A N51 131.3(13) . . ?
C54 O54 C541 116.3(13) . . ?
O54 C541 C542 108.4(11) . . ?
C543 C542 C541 115.3(12) . . ?
C542 C543 C544 112.9(12) . . ?
C57 O57 C571 117.3(12) . . ?
O57 C571 C572 109.3(14) . . ?
C573 C572 C571 117.0(15) . . ?
C572 C573 C574 113.9(17) . . ?
C32 C31 C36 119.2(4) . . ?
C32 C31 C3 122.2(3) . . ?
C36 C31 C3 118.6(4) . . ?
C33 C32 C31 119.4(3) . . ?
C33 C32 C2 120.9(4) . . ?
C31 C32 C2 119.7(3) . . ?
C32 C33 C34 120.6(4) . . ?
C35 C34 C33 119.6(4) . . ?
C34 C35 C36 120.8(4) . . ?
C35 C36 C31 120.3(4) . . ?
N43 C3 C31 111.5(3) . . ?
C42 N41 C47A 108.1(4) . . ?
C42 N41 C4 124.9(4) . . ?
C47A N41 C4 127.0(4) . . ?
N41 C42 N43 110.8(4) . . ?
C42 N43 C43A 107.9(4) . . ?
C42 N43 C3 123.6(4) . . ?
C43A N43 C3 128.4(4) . . ?
C47A C43A N43 106.3(4) . . ?
C47A C43A C44 120.9(5) . . ?
N43 C43A C44 132.8(5) . . ?
O44 C44 C45 126.5(4) . . ?
O44 C44 C43A 118.3(4) . . ?
C45 C44 C43A 115.2(5) . . ?
C44 O44 C441 116.0(4) . . ?
O44 C441 C442 108.4(4) . . ?
C443 C442 C441 115.2(4) . . ?
C442 C443 C444 110.4(5) . . ?
O47 C471 C472 116.5(6) . . ?
O47 C471 C475 108.8(10) . . ?
C471 C472 C473 107.4(8) . . ?
C474 C473 C472 105.4(9) . . ?
C476 C475 C471 116.3(18) . . ?
C475 C476 C477 114.0(14) . . ?
C46 C45 C44 123.0(4) . . ?
C47 C46 C45 122.4(5) . . ?
O47 C47 C46 127.9(5) . . ?
O47 C47 C47A 117.1(4) . . ?
C46 C47 C47A 114.9(5) . . ?
C47 O47 C471 120.2(4) . . ?
C43A C47A N41 106.9(4) . . ?
C43A C47A C47 123.6(4) . . ?
N41 C47A C47 129.5(5) . . ?
 
loop_
    _geom_hbond_atom_site_label_D
    _geom_hbond_atom_site_label_H
    _geom_hbond_atom_site_label_A
    _geom_hbond_distance_DH
    _geom_hbond_distance_HA
    _geom_hbond_distance_DA
    _geom_hbond_angle_DHA
    _geom_hbond_site_symmetry_A
C22 H22 Cl1 0.95 2.51 3.365(8) 149.8 .
C42 H42 Cl1 0.95 2.61 3.396(4) 140.6 .
C52 H52 Cl1 0.95 2.51 3.364(18) 150.3 .
O1 H1AO Cl1 0.83(3) 2.46(3) 3.273(4) 166(5) .
O1 H1BO Cl2 0.88(3) 2.28(3) 3.135(4) 166(6) .
 
_iucr_refine_instructions_details
;

TITL ps295b in C2/c
CELL  1.54178  31.1544  15.0002  17.3313   90.000   98.312   90.000
ZERR     8.00   0.0015   0.0008   0.0008    0.000    0.005    0.000
LATT   7
SYMM  - X,   Y, 1/2 - Z
SFAC  C    H    N    O    CL
UNIT  320  464  32   40   16
MERG   2
dfix  .82 .04 O1 H1AO O1 H1bO
dfix   1.35 .04  H1aO H1bO
htab  C22 Cl1
htab   C42 Cl1
htab   C52 Cl1
htab   O1 Cl1
htab  O1 Cl2
dfix  1.40 .02 C54 O54 O54 C541 C57 O57 O57 C571
dfix   1.52 .02  C541 C542 C542 C543 C543 C544
dfix   1.52  .02 C571 C572 C572 C573 C573 C574
dfix   2.52 .02  C571 C573 C572 C574
dfix   2.52 .02  C541 C543 C542 C544
dfix   2.43  .02 O54 C542 O57 C572
dfix   1.45 .04  C1  N23   C5  N53
dfix  2.45  .02   C22 C1  C52 C5
dfix  2.57  .02  C23A C1  C53A C5
dfix 1.52 .02 C471 c472 C472 C473 C473 C474 C471 C475 C475 C476 C476 C477
dfix 2.52 .02 C471 C473 C472 C474 C471 C476 C475 C477
eadp C1 C5
eadp C472 c475
simu .02 .02 N51  > C57A
isor  .02 .02 O27 > C274 C472 > C474
FMAP   2
PLAN   25
ACTA
WGHT     0.09720
L.S.  15
TEMP  -173.00
FVAR     0.58247   0.72149   0.60708
PART    1
C1    1    0.430430    0.308516    0.688761    21.00000    0.05184    0.03223 =
        0.05614    0.00731    0.00515    0.00312
AFIX  137
H1A   2    0.432858    0.293656    0.634499    21.00000   -1.50000
H1B   2    0.403954    0.281832    0.703003    21.00000   -1.50000
H1C   2    0.455710    0.285157    0.723021    21.00000   -1.50000
AFIX    0
PART    2
C5    1    0.436470    0.337557    0.684019   -21.00000    0.05184    0.03223 =
        0.05614    0.00731    0.00515    0.00312
AFIX  137
H5A   2    0.466686    0.320206    0.701000   -21.00000   -1.50000
H5B   2    0.428957    0.326320    0.627991   -21.00000   -1.50000
H5C   2    0.417361    0.302581    0.712606   -21.00000   -1.50000
AFIX    0
PART    1
N21   3    0.405922    0.536476    0.727576    21.00000    0.03597    0.03998 =
        0.04337   -0.00100    0.00768    0.01193
C22   1    0.398727    0.448262    0.730083    21.00000    0.04558    0.03810 =
        0.03992    0.00032   -0.00147   -0.00189
AFIX   43
H22   2    0.375747    0.420982    0.751976    21.00000   -1.20000
AFIX    0
N23   3    0.428599    0.405035    0.697329    21.00000    0.04219    0.03553 =
        0.04740    0.00411    0.00126   -0.00276
C23A  1    0.456839    0.467714    0.672519    21.00000    0.03939    0.03352 =
        0.04223    0.00253   -0.00247    0.00397
C24   1    0.493877    0.458716    0.636144    21.00000    0.04229    0.04132 =
        0.04609   -0.00364   -0.00112    0.01030
C25   1    0.513472    0.535623    0.617268    21.00000    0.03413    0.03736 =
        0.04594    0.00209   -0.00004    0.00189
AFIX   43
H25   2    0.538568    0.531472    0.592181    21.00000   -1.20000
AFIX    0
C26   1    0.497727    0.622041    0.633752    21.00000    0.03601    0.02943 =
        0.05248   -0.00024    0.00546    0.00374
AFIX   43
H26   2    0.511798    0.674053    0.618656    21.00000   -1.20000
AFIX    0
C27   1    0.462261    0.629186    0.671411    21.00000    0.04507    0.03525 =
        0.04593   -0.00639    0.00167    0.00316
C27A  1    0.441676    0.550978    0.690841    21.00000    0.03336    0.03718 =
        0.04500   -0.00005    0.00051    0.00734
O24   4    0.507869    0.373083    0.625539    21.00000    0.03454    0.03813 =
        0.05404    0.00372    0.00333    0.00627
C241  1    0.543583    0.363949    0.581709    21.00000    0.03639    0.05114 =
        0.04669   -0.00298    0.00398    0.00622
AFIX   23
H24A  2    0.570009    0.392006    0.610116    21.00000   -1.20000
H24B  2    0.536605    0.393201    0.530217    21.00000   -1.20000
AFIX    0
C242  1    0.550798    0.264981    0.571634    21.00000    0.04921    0.04887 =
        0.05435   -0.00429    0.00356    0.00624
AFIX   23
H24C  2    0.524961    0.238984    0.539528    21.00000   -1.20000
H24D  2    0.554242    0.235713    0.623359    21.00000   -1.20000
AFIX    0
C243  1    0.590716    0.246153    0.532886    21.00000    0.05147    0.06380 =
        0.06000   -0.01059    0.00342    0.01080
AFIX   23
H24E  2    0.616646    0.271757    0.565017    21.00000   -1.20000
H24F  2    0.587365    0.275293    0.481110    21.00000   -1.20000
AFIX    0
C244  1    0.597299    0.145785    0.523119    21.00000    0.07268    0.06115 =
        0.06269   -0.00899    0.00266    0.01772
AFIX  137
H24G  2    0.601672    0.117167    0.574489    21.00000   -1.50000
H24H  2    0.622816    0.135662    0.497185    21.00000   -1.50000
H24I  2    0.571618    0.120328    0.491438    21.00000   -1.50000
AFIX    0
O27   4    0.444378    0.707442    0.692737    21.00000    0.04174    0.03570 =
        0.05330    0.00324    0.01225    0.00606
C271  1    0.461901    0.787183    0.667172    21.00000    0.11204    0.04639 =
        0.07326   -0.00499    0.04334   -0.00129
AFIX   23
H27A  2    0.462769    0.785574    0.610314    21.00000   -1.20000
H27B  2    0.491586    0.797614    0.694724    21.00000   -1.20000
AFIX    0
C272  1    0.430846    0.858439    0.687555    21.00000    0.15738    0.05919 =
        0.07949    0.00272    0.07440    0.01246
AFIX   23
H27C  2    0.438125    0.915150    0.663253    21.00000   -1.20000
H27D  2    0.401132    0.841676    0.663735    21.00000   -1.20000
AFIX    0
C273  1    0.430523    0.874409    0.770782    21.00000    0.10601    0.07420 =
        0.10016   -0.03238    0.05502   -0.02772
AFIX   23
H27E  2    0.460056    0.892059    0.794889    21.00000   -1.20000
H27F  2    0.423245    0.817962    0.795510    21.00000   -1.20000
AFIX    0
C274  1    0.398254    0.946873    0.788316    21.00000    0.13416    0.10435 =
        0.11355   -0.03901    0.07470   -0.01210
AFIX  137
H27G  2    0.370222    0.937087    0.755745    21.00000   -1.50000
H27H  2    0.409491    1.005706    0.776918    21.00000   -1.50000
H27I  2    0.394521    0.943927    0.843442    21.00000   -1.50000
AFIX    0
PART    0
C2    1    0.378922    0.603492    0.770781    11.00000    0.05700    0.04128 =
        0.04906    0.00156   -0.00638    0.00018
PART    1
AFIX   23
H2A   2    0.363567    0.569722    0.807567    21.00000   -1.20000
H2B   2    0.399131    0.645292    0.801761    21.00000   -1.20000
PART    2
H2C   2    0.363606    0.569026    0.807186   -21.00000   -1.20000
H2D   2    0.398941    0.645297    0.802172   -21.00000   -1.20000
AFIX    0
same   N21 > C27A
N51   3    0.399563    0.553991    0.738213   -21.00000    0.02769
C52   1    0.400501    0.464495    0.737318   -21.00000    0.02751
AFIX   43
H52   2    0.381154    0.428456    0.761400   -21.00000   -1.20000
AFIX    0
N53   3    0.431186    0.431008    0.699397   -21.00000    0.02931
C53A  1    0.453204    0.504572    0.675569   -21.00000    0.03474
C54   1    0.489270    0.508236    0.636765   -21.00000    0.04727
C55   1    0.504081    0.590479    0.621930   -21.00000    0.03403
AFIX   43
H55   2    0.528747    0.595618    0.595784   -21.00000   -1.20000
AFIX    0
C56   1    0.483578    0.670073    0.644577   -21.00000    0.04689
AFIX   43
H56   2    0.493458    0.726769    0.630180   -21.00000   -1.20000
AFIX    0
C57   1    0.450498    0.664576    0.686025   -21.00000    0.03470
C57A  1    0.434449    0.580574    0.700044   -21.00000    0.03197
O54   4    0.506258    0.430262    0.618759   -21.00000    0.04679
C541  1    0.541163    0.434801    0.572148   -21.00000    0.05957
AFIX   23
H54A  2    0.567688    0.458625    0.603775   -21.00000   -1.20000
H54B  2    0.533039    0.474925    0.527047   -21.00000   -1.20000
AFIX    0
C542  1    0.549443    0.342775    0.544306   -21.00000    0.05970
AFIX   23
H54C  2    0.522893    0.321512    0.511059   -21.00000   -1.20000
H54D  2    0.572772    0.346037    0.511215   -21.00000   -1.20000
AFIX    0
C543  1    0.562052    0.275742    0.606801   -21.00000    0.05463
AFIX   23
H54E  2    0.538432    0.270507    0.639099   -21.00000   -1.20000
H54F  2    0.588306    0.296979    0.640908   -21.00000   -1.20000
AFIX    0
C544  1    0.571173    0.183924    0.574959   -21.00000    0.07719
AFIX  137
H54G  2    0.546933    0.166139    0.535473   -21.00000   -1.50000
H54H  2    0.574549    0.140440    0.617607   -21.00000   -1.50000
H54I  2    0.597897    0.186215    0.551343   -21.00000   -1.50000
AFIX    0
O57   4    0.428767    0.734220    0.715429   -21.00000    0.04586
C571  1    0.425534    0.815872    0.672700   -21.00000    0.10772
AFIX   23
H57A  2    0.416041    0.803712    0.616688   -21.00000   -1.20000
H57B  2    0.454235    0.845390    0.678141   -21.00000   -1.20000
AFIX    0
C572  1    0.393006    0.876354    0.703884   -21.00000    0.06975
AFIX   23
H57C  2    0.394294    0.935510    0.678993   -21.00000   -1.20000
H57D  2    0.363634    0.851918    0.686967   -21.00000   -1.20000
AFIX    0
C574  1    0.433983    0.955791    0.820447   -21.00000    0.14589
AFIX  137
H57E  2    0.421918    1.016206    0.818958   -21.00000   -1.50000
H57F  2    0.457173    0.953206    0.787862   -21.00000   -1.50000
H57G  2    0.445773    0.940338    0.874292   -21.00000   -1.50000
AFIX    0
C573  1    0.398249    0.889712    0.789618   -21.00000    0.12969
AFIX   23
H57H  2    0.404790    0.831496    0.815583   -21.00000   -1.20000
H57I  2    0.370410    0.911191    0.803957   -21.00000   -1.20000
AFIX    0
PART    0
C31   1    0.320755    0.721295    0.747279    11.00000    0.06912    0.04151 =
        0.05622    0.00065   -0.01543    0.00210
C32   1    0.345879    0.657020    0.716500    11.00000    0.05757    0.03746 =
        0.05178    0.00289   -0.00979   -0.00323
C33   1    0.339893    0.642135    0.636413    11.00000    0.06186    0.04098 =
        0.05241    0.00480   -0.00648   -0.00523
AFIX   43
H33   2    0.356985    0.598595    0.615160    11.00000   -1.20000
AFIX    0
C34   1    0.308956    0.690658    0.586917    11.00000    0.08262    0.04276 =
        0.05636    0.00551   -0.01965   -0.00128
AFIX   43
H34   2    0.305382    0.680855    0.532209    11.00000   -1.20000
AFIX    0
C35   1    0.283968    0.752063    0.617564    11.00000    0.08853    0.04905 =
        0.07045    0.00308   -0.03324    0.00622
AFIX   43
H35   2    0.262517    0.784056    0.584026    11.00000   -1.20000
AFIX    0
C36   1    0.289465    0.768383    0.696962    11.00000    0.08133    0.04469 =
        0.07230   -0.00354   -0.02826    0.01246
AFIX   43
H36   2    0.271946    0.811710    0.717457    11.00000   -1.20000
AFIX    0
C3    1    0.326280    0.742477    0.833934    11.00000    0.06713    0.04860 =
        0.06209   -0.01125   -0.01341    0.00954
AFIX   23
H3A   2    0.355078    0.721365    0.858887    11.00000   -1.20000
H3B   2    0.325146    0.807863    0.841143    11.00000   -1.20000
AFIX    0
N41   3    0.257412    0.592688    0.922355    11.00000    0.09116    0.06195 =
        0.03838   -0.00287    0.00287    0.02930
C42   1    0.293185    0.614576    0.894378    11.00000    0.08116    0.06222 =
        0.04353   -0.00182    0.00963    0.02922
AFIX   43
H42   2    0.316568    0.574969    0.890472    11.00000   -1.20000
AFIX    0
N43   3    0.292073    0.699758    0.872346    11.00000    0.06982    0.05690 =
        0.05186   -0.01465   -0.01149    0.02672
C43A  1    0.252847    0.736217    0.887623    11.00000    0.07372    0.06037 =
        0.04708   -0.01761   -0.01436    0.01818
C44   1    0.234868    0.822731    0.878264    11.00000    0.07022    0.06302 =
        0.06203   -0.02724   -0.01978    0.03088
O44   4    0.258197    0.887579    0.847813    11.00000    0.07090    0.04895 =
        0.09198   -0.02584   -0.02588    0.01963
C441  1    0.234978    0.968475    0.823840    11.00000    0.08615    0.05043 =
        0.09517   -0.01922   -0.02459    0.02692
AFIX   23
H44A  2    0.227100    1.000053    0.869955    11.00000   -1.20000
H44B  2    0.207972    0.954219    0.788481    11.00000   -1.20000
AFIX    0
C442  1    0.264188    1.027281    0.781934    11.00000    0.10661    0.06010 =
        0.07451   -0.00961   -0.02879    0.01356
AFIX   23
H44C  2    0.276484    0.990419    0.743097    11.00000   -1.20000
H44D  2    0.246128    1.074168    0.753069    11.00000   -1.20000
AFIX    0
C443  1    0.300923    1.071462    0.833823    11.00000    0.12572    0.08606 =
        0.07419   -0.00530   -0.02227    0.01235
AFIX   23
H44E  2    0.321332    1.025527    0.858218    11.00000   -1.20000
H44F  2    0.289412    1.104361    0.875920    11.00000   -1.20000
AFIX    0
C444  1    0.325392    1.137247    0.785802    11.00000    0.12958    0.15224 =
        0.10361    0.04209   -0.02909   -0.01310
AFIX  137
H44G  2    0.333154    1.106537    0.739857    11.00000   -1.50000
H44H  2    0.351803    1.158410    0.818259    11.00000   -1.50000
H44I  2    0.306599    1.188144    0.769105    11.00000   -1.50000
AFIX    0
C471  1    0.129083    0.607849    0.989722    11.00000    0.10271    0.10841 =
        0.09099   -0.03311    0.02301    0.02496
PART    1
AFIX   23
H47A  2    0.123372    0.666775    1.011876    21.00000   -1.20000
H47B  2    0.125867    0.562494    1.029987    21.00000   -1.20000
PART    2
H47J  2    0.123158    0.664934    1.014845   -21.00000   -1.20000
H47K  2    0.124358    0.558804    1.025782   -21.00000   -1.20000
AFIX    0
PART    1
C472  1    0.096337    0.591703    0.923784    21.00000    0.09872    0.06893 =
        0.12282   -0.02197    0.03553    0.00876
AFIX   23
H47C  2    0.102954    0.536370    0.896678    21.00000   -1.20000
H47D  2    0.095194    0.641881    0.886438    21.00000   -1.20000
AFIX    0
C473  1    0.051018    0.582196    0.955917    21.00000    0.12846    0.11412 =
        0.14959   -0.04421    0.01487    0.01343
AFIX   23
H47E  2    0.050824    0.528307    0.988843    21.00000   -1.20000
H47F  2    0.045446    0.635060    0.987199    21.00000   -1.20000
AFIX    0
C474  1    0.017523    0.574877    0.884595    21.00000    0.15263    0.13939 =
        0.17059   -0.04881    0.02887    0.00341
AFIX   33
H47G  2   -0.011240    0.567553    0.900354    21.00000   -1.50000
H47H  2    0.024033    0.523182    0.853708    21.00000   -1.50000
H47I  2    0.017920    0.629120    0.853190    21.00000   -1.50000
AFIX    0
PART    2
C475  1    0.098207    0.607587    0.909172   -21.00000    0.09872    0.06893 =
        0.12282   -0.02197    0.03553    0.00876
AFIX   23
H47L  2    0.105945    0.659089    0.878219   -21.00000   -1.20000
H47M  2    0.104078    0.552853    0.880536   -21.00000   -1.20000
AFIX    0
C476  1    0.049886    0.611753    0.913051   -21.00000    0.05982
AFIX   23
H47N  2    0.043400    0.668508    0.938140   -21.00000   -1.20000
H47O  2    0.042163    0.562453    0.946450   -21.00000   -1.20000
AFIX    0
C477  1    0.020736    0.605153    0.831522   -21.00000    0.11010
AFIX   33
H47P  2   -0.009895    0.605161    0.838694   -21.00000   -1.50000
H47Q  2    0.027406    0.549863    0.805567   -21.00000   -1.50000
H47R  2    0.026482    0.656311    0.799363   -21.00000   -1.50000
AFIX    0
PART    0
C45   1    0.194294    0.832638    0.901983    11.00000    0.08165    0.06339 =
        0.06810   -0.03459   -0.02407    0.02960
AFIX   43
H45   2    0.180580    0.889291    0.896126    11.00000   -1.20000
AFIX    0
C46   1    0.172944    0.763370    0.933851    11.00000    0.07742    0.08658 =
        0.04987   -0.02429   -0.00928    0.02723
AFIX   43
H46   2    0.145485    0.774789    0.949553    11.00000   -1.20000
AFIX    0
C47   1    0.190141    0.678715    0.943515    11.00000    0.08806    0.07815 =
        0.03917   -0.01347   -0.00673    0.02429
O47   4    0.173005    0.606488    0.975196    11.00000    0.08717    0.09925 =
        0.05531   -0.00539    0.01445    0.03142
C47A  1    0.231036    0.668205    0.919587    11.00000    0.07525    0.07355 =
        0.04021   -0.01947   -0.00678    0.03407
C4    1    0.247508    0.503406    0.949299    11.00000    0.10335    0.09231 =
        0.06614    0.02421    0.03606    0.03434
AFIX  137
H4A   2    0.272676    0.464453    0.948306    11.00000   -1.50000
H4B   2    0.222532    0.478972    0.914940    11.00000   -1.50000
H4C   2    0.240693    0.507099    1.002666    11.00000   -1.50000
AFIX    0
O1    4    0.369732    0.509573    1.023957    11.00000    0.07874    0.08665 =
        0.05676    0.00600    0.01415    0.00486
CL1   5    0.331371    0.408116    0.861370    11.00000    0.05910    0.04498 =
        0.06620    0.01042    0.01827    0.00258
CL2   5    0.417587    0.676999    0.969508    11.00000    0.05478    0.07816 =
        0.04596   -0.00685    0.00716    0.01337
H1AO  2    0.360750    0.475165    0.987744    11.00000    0.07929
H1BO  2    0.385607    0.549420    1.004240    11.00000    0.11981
HKLF    4
END

;
#===END


data_global
 


 
# 1. SUBMISSION DETAILS
#----------------------
 
_publ_contact_author_name
     'Skelton, B. W.'
_publ_contact_author_address
;
  Chemistry,
School of Biomedical, Biomolecular and Chemical Science, 
M313, University of Western Australia, 
Perth, WA 6009,
 Australia
;
_publ_contact_author_email           brian.skelton@uwa.edu.au
_publ_contact_author_fax               (+61)_08_6488_1118
_publ_contact_author_phone             (+61)_08_6488_7107
 

 
loop_
_publ_author_name
_publ_author_footnote
_publ_author_address
 
 
'Skelton, Brian W.' .
; Chemistry,
School of Biomedical, Biomolecular and Chemical Science, 
M313, University of Western Australia, 
Perth, WA 6009,
 Australia
;

_publ_section_references
;
Farrugia, L. J. (1999). J. Appl. Cryst. 32, 837-838. 
 
Johnson, C. K. (1976). ORTEPII. Report ORNL-5138.
 Oak Ridge National Laboratory, Tennessee, USA. 
 
Oxford Diffraction (2006). CrysAlis CCD. Oxford Diffraction Ltd, 
Abingdon, England.

Oxford Diffraction (2006). CrysAlis RED. Oxford Diffraction Ltd, 
Abingdon, England.

Sheldrick, G. M. (2008). Acta Cryst. A64, 112-122.
;
#------------------------------------------------------------------------------
# start Validation Reply Form

_vrf_PLAT220_ps322a
;
PROBLEM: Large Non-Solvent    C     Ueq(max)/Ueq(min) ...       4.25 Ratio
        
RESPONSE: This is due to the relatively large ADP's on the terminal atoms 
 of one of the long chains compared to those of some of the ring atoms. 
There was no indication that a disordered model would be an improvement.
;

_vrf_PLAT222_ps322a
;
PROBLEM: Large Non-Solvent    H     Ueq(max)/Ueq(min) ...       4.50 Ratio

        
RESPONSE: This is due to the relatively large ADP's on the terminal atoms 
 of one of the long chains compared to those of some of the ring atoms. 
There was no indication that a disordered model would be an improvement.
;


# end Validation Reply Form

 
#------------------  SECTION 2. COMPOUND(S) DETAILS -------------------------#
 
data_ps322a
 
_audit_creation_date                    2014-06-04T09:39:05-00:00
_audit_creation_method                  'WinGX routine CIF_UPDATE'
 
#----------------------------------------------------------------------------#
#                   CHEMICAL INFORMATION                                     #
#----------------------------------------------------------------------------#
 
_chemical_name_systematic
;
 ?
;
_chemical_formula_sum                   'C98 H126 Ag Cl5 N8 O8 Ru2'
_chemical_formula_moiety      'C80 H108 Cl3 N8 O8 Ru2, 3(C6 H6), Ag Cl2'
_chemical_formula_weight                2031.33
 
#----------------------------------------------------------------------------#
#                   UNIT CELL INFORMATION                                    #
#----------------------------------------------------------------------------#
 
_symmetry_cell_setting                  triclinic
_symmetry_space_group_name_H-M          'P -1'
_symmetry_space_group_name_Hall         '-P_1'
loop_
    _symmetry_equiv_pos_as_xyz
'x, y, z'
'-x, -y, -z'
 
_cell_length_a                          16.7862(10)
_cell_length_b                          19.0439(12)
_cell_length_c                          19.1721(14)
_cell_angle_alpha                       63.626(7)
_cell_angle_beta                        88.450(5)
_cell_angle_gamma                       64.963(6)
_cell_volume                            4876.2(6)
_cell_formula_units_Z                   2
_cell_measurement_temperature           200(2)
_cell_measurement_reflns_used           13330
_cell_measurement_theta_min             2.8334
_cell_measurement_theta_max             66.9632
 
#----------------------------------------------------------------------------#
#                   CRYSTAL INFORMATION                                      #
#----------------------------------------------------------------------------#
 
_exptl_crystal_description              plate
_exptl_crystal_colour                   orange
_exptl_crystal_size_max                 0.34
_exptl_crystal_size_mid                 0.17
_exptl_crystal_size_min                 0.06
_exptl_crystal_density_diffrn           1.384
_exptl_crystal_density_method           'not measured'
_exptl_crystal_F_000                    2108
_exptl_special_details
;
 ?
;
 
#----------------------------------------------------------------------------#
#                   ABSORPTION CORRECTION                                    #
#----------------------------------------------------------------------------#
 
_exptl_absorpt_coefficient_mu           5.788
_exptl_absorpt_correction_type          analytical
_exptl_absorpt_process_details
;
   CrysAlisPro, Oxford Diffraction Ltd.,
Analytical numeric absorption correction using a multifaceted crystal
                    model based on expressions derived by R.C. Clark & J.S.
        (Clark, R. C. & Reid, J. S. (1995). Acta Cryst. A51, 887-897)

;
_exptl_absorpt_correction_T_min         0.499
_exptl_absorpt_correction_T_max         0.81
 
#----------------------------------------------------------------------------#
#                   DATA COLLECTION                                          #
#----------------------------------------------------------------------------#
 
_diffrn_ambient_temperature             200(2)
_diffrn_radiation_wavelength            1.54178
_diffrn_radiation_type                  CuK\a
_diffrn_radiation_monochromator         graphite
_diffrn_detector_area_resol_mean        10.4738
_diffrn_orient_matrix_ub_11             -0.0412578539
_diffrn_orient_matrix_ub_12             0.0070879795
_diffrn_orient_matrix_ub_13             -0.0751772937
_diffrn_orient_matrix_ub_21             -0.0938697422
_diffrn_orient_matrix_ub_22             0.0594965385
_diffrn_orient_matrix_ub_23             0.0061624641
_diffrn_orient_matrix_ub_31             0.0129900394
_diffrn_orient_matrix_ub_32             0.082022777
_diffrn_orient_matrix_ub_33             -0.0518013775
_diffrn_measurement_device_type   'Oxford Diffraction Gemini dfiifractometer'
_diffrn_measurement_method              '\w scans'
_diffrn_reflns_av_R_equivalents         0.0703
_diffrn_reflns_av_unetI/netI            0.0661
_diffrn_reflns_number                   50206
_diffrn_reflns_limit_h_min              -19
_diffrn_reflns_limit_h_max              20
_diffrn_reflns_limit_k_min              -22
_diffrn_reflns_limit_k_max              22
_diffrn_reflns_limit_l_min              -22
_diffrn_reflns_limit_l_max              22
_diffrn_reflns_theta_min                2.84
_diffrn_reflns_theta_max                67.26
_diffrn_reflns_theta_full               67
_diffrn_measured_fraction_theta_full
                                        0.991
_diffrn_measured_fraction_theta_max
                                        0.986
_reflns_number_total                    17225
_reflns_number_gt                       11669
_reflns_threshold_expression            I>2\s(I)
 
#----------------------------------------------------------------------------#
#                   COMPUTER PROGRAMS USED                                   #
#----------------------------------------------------------------------------#
 
_computing_data_collection
;
        CrysAlisPro, Oxford Diffraction Ltd.,
        Version 1.171.33.52 (release 06-11-2009 CrysAlis171 .NET)
        (compiled Nov  6 2009,16:24:50)
;
_computing_cell_refinement
;
        CrysAlisPro, Oxford Diffraction Ltd.,
        Version 1.171.33.52 (release 06-11-2009 CrysAlis171 .NET)
        (compiled Nov  6 2009,16:24:50)
;
_computing_data_reduction
;
        CrysAlisPro, Oxford Diffraction Ltd.,
        Version 1.171.33.52 (release 06-11-2009 CrysAlis171 .NET)
        (compiled Nov  6 2009,16:24:50)
;
_computing_structure_refinement         'SHELXL-97 (Sheldrick, 2008)'
_computing_molecular_graphics           'Diamond (Brandenburg, K., (1999)'
_computing_publication_material        'WinGX Farrugia, L. J. (1999)'
 
#----------------------------------------------------------------------------#
#                   STRUCTURE SOLUTION
#----------------------------------------------------------------------------#
 
_atom_sites_solution_primary            direct
_atom_sites_solution_secondary          difmap
_atom_sites_solution_hydrogens          geom
 
#----------------------------------------------------------------------------#
#                   REFINEMENT INFORMATION                                   #
#----------------------------------------------------------------------------#
 
_refine_special_details
;
 Refinement of F^2^ against ALL reflections.  The weighted R-factor wR and
 goodness of fit S are based on F^2^, conventional R-factors R are based
 on F, with F set to zero for negative F^2^. The threshold expression of
 F^2^ > 2\s(F^2^) is used only for calculating R-factors(gt) etc. and is
 not relevant to the choice of reflections for refinement.  R-factors based
 on F^2^ are statistically about twice as large as those based on F, and R-
 factors based on ALL data will be even larger.

Geometries of three of the solvent benzene molecules were restrained to ideal 
values. Although the terminal atoms of two of the butyl groups exhibited large
displacement parameters, satisfactory disordered models could not be obtained.
Their geometries and displacement parameters were restrained to reasonable
 values.

;
_refine_ls_structure_factor_coef        Fsqd
_refine_ls_matrix_type                  full
_refine_ls_weighting_scheme             calc
_refine_ls_weighting_details
         'calc w=1/[\s^2^(Fo^2^)+(0.1441P)^2^] where P=(Fo^2^+2Fc^2^)/3'
_refine_ls_hydrogen_treatment           constr
_refine_ls_extinction_method            none
_refine_ls_number_reflns                17225
_refine_ls_number_parameters            1111
_refine_ls_number_restraints            98
_refine_ls_R_factor_all                 0.1036
_refine_ls_R_factor_gt                  0.0714
_refine_ls_wR_factor_ref                0.2042
_refine_ls_wR_factor_gt                 0.1798
_refine_ls_goodness_of_fit_ref          0.975
_refine_ls_restrained_S_all             0.976
_refine_ls_shift/su_max                 0.001
_refine_ls_shift/su_mean                0
_refine_diff_density_max                3.158
_refine_diff_density_min                -1.117
_refine_diff_density_rms                0.143
 
#----------------------------------------------------------------------------#
#                   ATOMIC TYPES, COORDINATES AND THERMAL PARAMETERS         #
#----------------------------------------------------------------------------#
 
loop_
    _atom_type_symbol
    _atom_type_description
    _atom_type_scat_dispersion_real
    _atom_type_scat_dispersion_imag
    _atom_type_scat_source
C C 0.0181 0.0091 'International Tables Vol C Tables 4.2.6.8 and 6.1.1.4'
H H 0 0 'International Tables Vol C Tables 4.2.6.8 and 6.1.1.4'
N N 0.0311 0.018 'International Tables Vol C Tables 4.2.6.8 and 6.1.1.4'
O O 0.0492 0.0322 'International Tables Vol C Tables 4.2.6.8 and 6.1.1.4'
Cl Cl 0.3639 0.7018 'International Tables Vol C Tables 4.2.6.8 and 6.1.1.4'
Ru Ru 0.0552 3.296 'International Tables Vol C Tables 4.2.6.8 and 6.1.1.4'
Ag Ag 0.1306 4.282 'International Tables Vol C Tables 4.2.6.8 and 6.1.1.4'
 
loop_
    _atom_site_label
    _atom_site_type_symbol
    _atom_site_fract_x
    _atom_site_fract_y
    _atom_site_fract_z
    _atom_site_U_iso_or_equiv
    _atom_site_adp_type
    _atom_site_occupancy
    _atom_site_symmetry_multiplicity
    _atom_site_calc_flag
    _atom_site_refinement_flags
    _atom_site_disorder_assembly
    _atom_site_disorder_group
Ru1 Ru 0.32977(3) 0.22486(3) 0.75085(3) 0.03278(14) Uani 1 1 d . . .
Ru2 Ru 0.54064(3) 0.19462(3) 0.77759(3) 0.03330(14) Uani 1 1 d . . .
Cl1 Cl 0.43540(9) 0.25126(9) 0.65921(8) 0.0368(3) Uani 1 1 d . . .
Cl2 Cl 0.39341(9) 0.29377(9) 0.79627(8) 0.0373(3) Uani 1 1 d . . .
Cl3 Cl 0.47419(9) 0.08879(9) 0.83598(8) 0.0378(3) Uani 1 1 d . . .
Ag1 Ag 0.18896(5) 0.99604(4) 0.69861(4) 0.0739(2) Uani 1 1 d . . .
Cl11 Cl 0.2311(3) 0.8491(2) 0.7854(2) 0.1286(13) Uani 1 1 d . . .
Cl12 Cl 0.12438(14) 1.14387(13) 0.60482(14) 0.0693(6) Uani 1 1 d . . .
C1 C 0.3217(5) 0.1922(5) 0.9523(4) 0.0487(16) Uani 1 1 d . . .
H1A H 0.3763 0.1735 0.9312 0.073 Uiso 1 1 calc R . .
H1B H 0.3302 0.146 1.0064 0.073 Uiso 1 1 calc R . .
H1C H 0.3092 0.2469 0.9531 0.073 Uiso 1 1 calc R . .
N21 N 0.1672(3) 0.2207(4) 0.8039(3) 0.0412(12) Uani 1 1 d . . .
C22 C 0.2473(4) 0.2142(4) 0.8282(4) 0.0393(14) Uani 1 1 d . . .
N23 N 0.2452(3) 0.2074(4) 0.9010(3) 0.0413(12) Uani 1 1 d . . .
C23A C 0.1643(5) 0.2110(5) 0.9235(4) 0.0470(16) Uani 1 1 d . . .
C24 C 0.1304(6) 0.2071(5) 0.9915(5) 0.0567(18) Uani 1 1 d . . .
O24 O 0.1814(4) 0.2034(5) 1.0487(4) 0.0723(17) Uani 1 1 d . . .
C241 C 0.1514(7) 0.1945(7) 1.1200(5) 0.075(3) Uani 1 1 d . . .
H24A H 0.157 0.1345 1.1518 0.09 Uiso 1 1 calc R . .
H24B H 0.0875 0.2377 1.1081 0.09 Uiso 1 1 calc R . .
C242 C 0.2051(9) 0.2098(10) 1.1648(7) 0.104(4) Uani 1 1 d D . .
H24C H 0.1919 0.2726 1.1357 0.125 Uiso 1 1 calc R . .
H24D H 0.1869 0.1986 1.2167 0.125 Uiso 1 1 calc R . .
C243 C 0.3008(10) 0.1556(9) 1.1787(8) 0.125(5) Uani 1 1 d D . .
H24E H 0.3198 0.1689 1.1269 0.151 Uiso 1 1 calc R . .
H24F H 0.314 0.0928 1.2056 0.151 Uiso 1 1 calc R . .
C244 C 0.3576(12) 0.1697(13) 1.2306(9) 0.150(7) Uani 1 1 d . . .
H24G H 0.3332 0.2328 1.2133 0.226 Uiso 1 1 calc R . .
H24H H 0.4201 0.1463 1.2243 0.226 Uiso 1 1 calc R . .
H24I H 0.3547 0.1387 1.2866 0.226 Uiso 1 1 calc R . .
C25 C 0.0467(6) 0.2097(6) 0.9940(6) 0.070(2) Uani 1 1 d . . .
H25 H 0.023 0.204 1.0408 0.084 Uiso 1 1 calc R . .
C26 C -0.0040(6) 0.2206(6) 0.9304(6) 0.068(2) Uani 1 1 d . . .
H26 H -0.0616 0.2233 0.9342 0.081 Uiso 1 1 calc R . .
C27 C 0.0277(5) 0.2273(5) 0.8625(5) 0.0564(19) Uani 1 1 d . . .
O27 O -0.0175(3) 0.2431(4) 0.7940(3) 0.0597(14) Uani 1 1 d . . .
C271 C -0.1074(5) 0.2554(6) 0.7925(5) 0.070(3) Uani 1 1 d . . .
H27A H -0.1438 0.3041 0.8042 0.084 Uiso 1 1 calc R . .
H27B H -0.1084 0.201 0.8331 0.084 Uiso 1 1 calc R . .
C272 C -0.1453(5) 0.2773(5) 0.7114(5) 0.062(2) Uani 1 1 d . . .
H27C H -0.2074 0.2847 0.7107 0.074 Uiso 1 1 calc R . .
H27D H -0.1487 0.3347 0.6726 0.074 Uiso 1 1 calc R . .
C273 C -0.0950(6) 0.2119(6) 0.6843(6) 0.079(3) Uani 1 1 d . . .
H27E H -0.0826 0.1525 0.727 0.094 Uiso 1 1 calc R . .
H27F H -0.0366 0.2119 0.6758 0.094 Uiso 1 1 calc R . .
C274 C -0.1430(7) 0.2284(8) 0.6087(7) 0.091(3) Uani 1 1 d . . .
H27G H -0.1955 0.2178 0.6192 0.137 Uiso 1 1 calc R . .
H27H H -0.1022 0.1884 0.5902 0.137 Uiso 1 1 calc R . .
H27I H -0.1625 0.2896 0.5678 0.137 Uiso 1 1 calc R . .
C27A C 0.1151(4) 0.2188(4) 0.8619(4) 0.0449(15) Uani 1 1 d . . .
C2 C 0.1578(4) 0.2122(5) 0.7340(4) 0.0433(15) Uani 1 1 d . . .
H2A H 0.1267 0.2711 0.6866 0.052 Uiso 1 1 calc R . .
H2B H 0.1226 0.1799 0.74 0.052 Uiso 1 1 calc R . .
C31 C 0.2878(4) 0.1940(4) 0.6571(4) 0.0383(13) Uani 1 1 d . . .
C32 C 0.2531(4) 0.1608(4) 0.7250(4) 0.0374(13) Uani 1 1 d . . .
C33 C 0.2938(4) 0.0676(4) 0.7780(4) 0.0436(15) Uani 1 1 d . . .
H33 H 0.2716 0.046 0.825 0.052 Uiso 1 1 calc R . .
C34 C 0.3618(5) 0.0104(4) 0.7631(5) 0.0497(17) Uani 1 1 d . . .
H34 H 0.3876 -0.051 0.7992 0.06 Uiso 1 1 calc R . .
C35 C 0.3949(5) 0.0414(5) 0.6936(5) 0.0491(16) Uani 1 1 d . . .
H35 H 0.4413 0.0005 0.6816 0.059 Uiso 1 1 calc R . .
C36 C 0.3618(4) 0.1287(4) 0.6438(4) 0.0459(15) Uani 1 1 d . . .
H36 H 0.3875 0.148 0.5986 0.055 Uiso 1 1 calc R . .
C3 C 0.2383(4) 0.2828(4) 0.5826(4) 0.0415(14) Uani 1 1 d . . .
H3A H 0.2787 0.2896 0.5443 0.05 Uiso 1 1 calc R . .
H3B H 0.186 0.285 0.5574 0.05 Uiso 1 1 calc R . .
N41 N 0.1809(3) 0.4168(3) 0.6773(3) 0.0381(11) Uani 1 1 d . . .
C42 C 0.2320(4) 0.3399(4) 0.6748(4) 0.0374(13) Uani 1 1 d . . .
N43 N 0.2077(3) 0.3554(3) 0.6014(3) 0.0382(11) Uani 1 1 d . . .
C43A C 0.1449(4) 0.4434(4) 0.5540(4) 0.0387(14) Uani 1 1 d . . .
C44 C 0.1083(4) 0.4918(4) 0.4717(4) 0.0409(15) Uani 1 1 d . . .
O44 O 0.1354(3) 0.4471(3) 0.4303(3) 0.0499(11) Uani 1 1 d . . .
C441 C 0.1004(5) 0.4947(5) 0.3467(4) 0.0487(16) Uani 1 1 d . . .
H44A H 0.116 0.5439 0.3208 0.058 Uiso 1 1 calc R . .
H44B H 0.0343 0.5195 0.3363 0.058 Uiso 1 1 calc R . .
C442 C 0.1411(6) 0.4314(6) 0.3143(5) 0.0606(19) Uani 1 1 d . . .
H44C H 0.1275 0.3812 0.343 0.073 Uiso 1 1 calc R . .
H44D H 0.2071 0.4077 0.325 0.073 Uiso 1 1 calc R . .
C443 C 0.1086(8) 0.4714(8) 0.2269(6) 0.090(3) Uani 1 1 d . . .
H44E H 0.1162 0.5254 0.1981 0.107 Uiso 1 1 calc R . .
H44F H 0.0439 0.4886 0.2164 0.107 Uiso 1 1 calc R . .
C444 C 0.1604(11) 0.4063(10) 0.1963(8) 0.119(5) Uani 1 1 d . . .
H44G H 0.225 0.3816 0.2146 0.179 Uiso 1 1 calc R . .
H44H H 0.1462 0.4372 0.1381 0.179 Uiso 1 1 calc R . .
H44I H 0.1433 0.3586 0.2165 0.179 Uiso 1 1 calc R . .
C45 C 0.0529(4) 0.5807(4) 0.4430(4) 0.0468(16) Uani 1 1 d . . .
H45 H 0.0273 0.6165 0.3878 0.056 Uiso 1 1 calc R . .
C46 C 0.0328(4) 0.6200(4) 0.4918(4) 0.0477(16) Uani 1 1 d . . .
H46 H -0.0071 0.6812 0.4692 0.057 Uiso 1 1 calc R . .
C47 C 0.0694(4) 0.5725(4) 0.5721(4) 0.0434(15) Uani 1 1 d . . .
O47 O 0.0557(3) 0.6048(3) 0.6246(3) 0.0542(12) Uani 1 1 d . . .
C471 C 0.0112(6) 0.6991(5) 0.5934(5) 0.063(2) Uani 1 1 d . . .
H47A H -0.051 0.7244 0.5658 0.075 Uiso 1 1 calc R . .
H47B H 0.0435 0.7263 0.555 0.075 Uiso 1 1 calc R . .
C472 C 0.0109(9) 0.7164(6) 0.6620(7) 0.096(3) Uani 1 1 d U . .
H47C H -0.0213 0.6883 0.6996 0.115 Uiso 1 1 calc R . .
H47D H -0.0228 0.7808 0.6424 0.115 Uiso 1 1 calc R . .
C473 C 0.1034(11) 0.6829(8) 0.7063(8) 0.120(4) Uani 1 1 d U . .
H47E H 0.1381 0.707 0.6687 0.144 Uiso 1 1 calc R . .
H47F H 0.1357 0.6177 0.731 0.144 Uiso 1 1 calc R . .
C474 C 0.0953(13) 0.7113(9) 0.7708(9) 0.146(5) Uani 1 1 d U . .
H47G H 0.0684 0.7757 0.7457 0.219 Uiso 1 1 calc R . .
H47H H 0.1551 0.6854 0.8021 0.219 Uiso 1 1 calc R . .
H47I H 0.0574 0.6908 0.8057 0.219 Uiso 1 1 calc R . .
C47A C 0.1273(4) 0.4818(4) 0.6022(4) 0.0401(14) Uani 1 1 d . . .
C4 C 0.1763(4) 0.4280(4) 0.7480(4) 0.0455(15) Uani 1 1 d . . .
H4A H 0.2191 0.3728 0.7935 0.068 Uiso 1 1 calc R . .
H4B H 0.1155 0.4432 0.7588 0.068 Uiso 1 1 calc R . .
H4C H 0.1912 0.4754 0.7393 0.068 Uiso 1 1 calc R . .
C5 C 0.5876(5) 0.0759(5) 0.6648(5) 0.0501(16) Uani 1 1 d . . .
H5A H 0.5405 0.0767 0.6962 0.075 Uiso 1 1 calc R . .
H5B H 0.6129 0.0215 0.6605 0.075 Uiso 1 1 calc R . .
H5C H 0.562 0.1269 0.6115 0.075 Uiso 1 1 calc R . .
N61 N 0.7318(3) 0.0921(3) 0.7855(3) 0.0413(12) Uani 1 1 d . . .
C62 C 0.6465(4) 0.1157(4) 0.7524(4) 0.0353(13) Uani 1 1 d . . .
N63 N 0.6584(3) 0.0796(4) 0.7036(3) 0.0434(13) Uani 1 1 d . . .
C63A C 0.7509(4) 0.0353(5) 0.7045(5) 0.0496(17) Uani 1 1 d . . .
C64 C 0.7940(5) -0.0070(6) 0.6614(5) 0.061(2) Uani 1 1 d . . .
O64 O 0.7434(4) -0.0103(5) 0.6092(4) 0.0726(16) Uani 1 1 d . . .
C641 C 0.7819(9) -0.0340(10) 0.5511(8) 0.102(4) Uani 1 1 d . . .
H64A H 0.8285 -0.0964 0.5773 0.123 Uiso 1 1 calc R . .
H64B H 0.8106 0.0033 0.5208 0.123 Uiso 1 1 calc R . .
C642 C 0.7091(9) -0.0213(8) 0.4954(7) 0.100(4) Uani 1 1 d . . .
H64C H 0.6636 0.0415 0.4697 0.119 Uiso 1 1 calc R . .
H64D H 0.7358 -0.0341 0.4531 0.119 Uiso 1 1 calc R . .
C643 C 0.6628(9) -0.0769(9) 0.5331(8) 0.100(4) Uani 1 1 d . . .
H64E H 0.6134 -0.0609 0.4932 0.12 Uiso 1 1 calc R . .
H64F H 0.6368 -0.0662 0.5765 0.12 Uiso 1 1 calc R . .
C644 C 0.7290(12) -0.1729(10) 0.5658(10) 0.139(6) Uani 1 1 d . . .
H64G H 0.7649 -0.1807 0.5262 0.208 Uiso 1 1 calc R . .
H64H H 0.6965 -0.208 0.5781 0.208 Uiso 1 1 calc R . .
H64I H 0.7685 -0.1924 0.6143 0.208 Uiso 1 1 calc R . .
C65 C 0.8881(6) -0.0445(6) 0.6761(6) 0.071(2) Uani 1 1 d . . .
H65 H 0.921 -0.073 0.6472 0.085 Uiso 1 1 calc R . .
C66 C 0.9340(5) -0.0400(6) 0.7337(6) 0.070(2) Uani 1 1 d . . .
H66 H 0.9977 -0.068 0.744 0.084 Uiso 1 1 calc R . .
C67 C 0.8910(5) 0.0026(5) 0.7747(5) 0.057(2) Uani 1 1 d . . .
O67 O 0.9286(3) 0.0095(4) 0.8324(3) 0.0583(13) Uani 1 1 d . . .
C671 C 1.0252(5) -0.0262(6) 0.8480(6) 0.067(2) Uani 1 1 d . . .
H67A H 1.0458 0.0017 0.799 0.081 Uiso 1 1 calc R . .
H67B H 1.0543 -0.0906 0.8675 0.081 Uiso 1 1 calc R . .
C672 C 1.0485(6) -0.0065(7) 0.9101(7) 0.082(3) Uani 1 1 d . . .
H67C H 1.0313 -0.0386 0.9597 0.098 Uiso 1 1 calc R . .
H67D H 1.0129 0.0574 0.8921 0.098 Uiso 1 1 calc R . .
C673 C 1.1482(7) -0.0323(7) 0.9279(7) 0.088(3) Uani 1 1 d . . .
H67E H 1.1675 -0.0076 0.8771 0.105 Uiso 1 1 calc R . .
H67F H 1.1563 -0.0055 0.9593 0.105 Uiso 1 1 calc R . .
C674 C 1.2065(7) -0.1287(9) 0.9718(8) 0.113(4) Uani 1 1 d . . .
H67G H 1.1899 -0.1534 1.0234 0.169 Uiso 1 1 calc R . .
H67H H 1.2692 -0.1407 0.9799 0.169 Uiso 1 1 calc R . .
H67I H 1.1988 -0.156 0.9412 0.169 Uiso 1 1 calc R . .
C67A C 0.7958(4) 0.0433(4) 0.7569(4) 0.0470(16) Uani 1 1 d . . .
C6 C 0.7386(4) 0.1183(4) 0.8445(4) 0.0466(16) Uani 1 1 d . . .
H6A H 0.7392 0.176 0.8189 0.056 Uiso 1 1 calc R . .
H6B H 0.7948 0.0741 0.8845 0.056 Uiso 1 1 calc R . .
C71 C 0.5930(4) 0.2013(4) 0.8842(4) 0.0386(13) Uani 1 1 d . . .
C72 C 0.6583(4) 0.1247(4) 0.8840(4) 0.0404(14) Uani 1 1 d . . .
C73 C 0.6669(4) 0.0401(4) 0.9422(4) 0.0459(16) Uani 1 1 d . . .
H73 H 0.7089 -0.0116 0.9408 0.055 Uiso 1 1 calc R . .
C74 C 0.6164(5) 0.0327(5) 0.9990(4) 0.0508(17) Uani 1 1 d . . .
H74 H 0.623 -0.0237 1.0369 0.061 Uiso 1 1 calc R . .
C75 C 0.5539(5) 0.1094(5) 1.0012(4) 0.0483(16) Uani 1 1 d . . .
H75 H 0.5199 0.1037 1.042 0.058 Uiso 1 1 calc R . .
C76 C 0.5413(4) 0.1902(5) 0.9473(4) 0.0458(16) Uani 1 1 d . . .
H76 H 0.4983 0.2405 0.9501 0.055 Uiso 1 1 calc R . .
C7 C 0.5956(5) 0.2890(5) 0.8478(4) 0.0482(16) Uani 1 1 d . . .
H7A H 0.5422 0.3322 0.8556 0.058 Uiso 1 1 calc R . .
H7B H 0.6495 0.2814 0.8761 0.058 Uiso 1 1 calc R . .
N81 N 0.5909(3) 0.3295(3) 0.6489(3) 0.0398(12) Uani 1 1 d . . .
C82 C 0.5788(4) 0.2886(4) 0.7230(4) 0.0374(14) Uani 1 1 d . . .
N83 N 0.5973(3) 0.3237(3) 0.7642(3) 0.0421(12) Uani 1 1 d . . .
C83A C 0.6181(4) 0.3901(4) 0.7164(4) 0.0410(14) Uani 1 1 d . . .
C84 C 0.6416(5) 0.4465(5) 0.7287(5) 0.0531(18) Uani 1 1 d . . .
O84 O 0.6441(4) 0.4378(4) 0.8035(4) 0.0644(14) Uani 1 1 d . . .
C841 C 0.6642(9) 0.4989(7) 0.8155(7) 0.088(3) Uani 1 1 d . . .
H84A H 0.6133 0.5591 0.7878 0.105 Uiso 1 1 calc R . .
H84B H 0.7182 0.5006 0.7944 0.105 Uiso 1 1 calc R . .
C842 C 0.6802(10) 0.4669(8) 0.9030(7) 0.098(4) Uani 1 1 d . . .
H84C H 0.6273 0.461 0.9234 0.117 Uiso 1 1 calc R . .
H84D H 0.686 0.5116 0.9125 0.117 Uiso 1 1 calc R . .
C843 C 0.7637(11) 0.3788(10) 0.9493(8) 0.124(5) Uani 1 1 d . . .
H84E H 0.7554 0.3332 0.943 0.149 Uiso 1 1 calc R . .
H84F H 0.8154 0.3834 0.9254 0.149 Uiso 1 1 calc R . .
C844 C 0.7855(14) 0.3488(11) 1.0347(9) 0.144(6) Uani 1 1 d . . .
H84G H 0.8019 0.3892 1.042 0.216 Uiso 1 1 calc R . .
H84H H 0.836 0.2893 1.0606 0.216 Uiso 1 1 calc R . .
H84I H 0.7332 0.3481 1.0585 0.216 Uiso 1 1 calc R . .
C85 C 0.6612(6) 0.5051(6) 0.6646(6) 0.067(2) Uani 1 1 d . . .
H85 H 0.6774 0.5441 0.6715 0.081 Uiso 1 1 calc R . .
C86 C 0.6580(6) 0.5085(6) 0.5913(5) 0.064(2) Uani 1 1 d . . .
H86 H 0.6714 0.55 0.5491 0.077 Uiso 1 1 calc R . .
C87 C 0.6361(5) 0.4538(5) 0.5777(5) 0.0509(17) Uani 1 1 d . . .
O87 O 0.6341(4) 0.4501(4) 0.5082(3) 0.0574(13) Uani 1 1 d . . .
C871 C 0.6797(7) 0.4893(6) 0.4521(6) 0.072(2) Uani 1 1 d . . .
H87A H 0.7381 0.4748 0.4793 0.087 Uiso 1 1 calc R . .
H87B H 0.6433 0.5543 0.4233 0.087 Uiso 1 1 calc R . .
C872 C 0.6943(8) 0.4512(9) 0.3930(6) 0.098(4) Uani 1 1 d D . .
H87C H 0.7327 0.4706 0.357 0.117 Uiso 1 1 calc R . .
H87D H 0.7249 0.3859 0.4229 0.117 Uiso 1 1 calc R . .
C873 C 0.6078(7) 0.4821(8) 0.3470(6) 0.101(4) Uani 1 1 d D . .
H87E H 0.5738 0.5472 0.3223 0.121 Uiso 1 1 calc R . .
H87F H 0.5722 0.4564 0.3819 0.121 Uiso 1 1 calc R . .
C874 C 0.6252(12) 0.4527(12) 0.2800(8) 0.131(6) Uani 1 1 d . . .
H87G H 0.6497 0.4874 0.2398 0.197 Uiso 1 1 calc R . .
H87H H 0.5686 0.4626 0.2551 0.197 Uiso 1 1 calc R . .
H87I H 0.6681 0.3899 0.3039 0.197 Uiso 1 1 calc R . .
C87A C 0.6199(5) 0.3923(4) 0.6450(4) 0.0433(16) Uani 1 1 d U . .
C8 C 0.5845(5) 0.3101(5) 0.5845(4) 0.0452(15) Uani 1 1 d . . .
H8A H 0.5849 0.2526 0.606 0.068 Uiso 1 1 calc R . .
H8B H 0.6356 0.3087 0.5582 0.068 Uiso 1 1 calc R . .
H8C H 0.5285 0.3558 0.5459 0.068 Uiso 1 1 calc R . .
C101 C 0.522(2) 0.2571(14) 0.4371(10) 0.175(11) Uani 1 1 d D . .
H101 H 0.5084 0.2743 0.4772 0.21 Uiso 1 1 calc R . .
C102 C 0.4597(17) 0.2485(17) 0.4043(17) 0.244(16) Uani 1 1 d D . .
H102 H 0.4045 0.2566 0.4218 0.293 Uiso 1 1 calc R . .
C103 C 0.480(2) 0.227(2) 0.343(2) 0.242(18) Uani 1 1 d D . .
H103 H 0.44 0.2152 0.3213 0.29 Uiso 1 1 calc R . .
C104 C 0.557(3) 0.223(2) 0.3148(13) 0.217(17) Uani 1 1 d D . .
H104 H 0.566 0.2162 0.2685 0.26 Uiso 1 1 calc R . .
C105 C 0.6228(19) 0.2280(17) 0.352(2) 0.218(14) Uani 1 1 d D . .
H105 H 0.6774 0.2218 0.3334 0.262 Uiso 1 1 calc R . .
C106 C 0.605(2) 0.243(2) 0.416(2) 0.26(2) Uani 1 1 d D . .
H106 H 0.6494 0.2426 0.446 0.314 Uiso 1 1 calc R . .
C201 C 0.5195(14) 0.2990(15) 0.0758(13) 0.193(7) Uani 1 1 d DU . .
H201 H 0.5714 0.2546 0.116 0.231 Uiso 1 1 calc R . .
C202 C 0.4394(16) 0.2929(15) 0.0759(13) 0.188(7) Uani 1 1 d DU . .
H202 H 0.4353 0.2453 0.1197 0.225 Uiso 1 1 calc R . .
C203 C 0.3652(15) 0.3541(17) 0.0138(15) 0.186(7) Uani 1 1 d DU . .
H203 H 0.3127 0.3466 0.0149 0.223 Uiso 1 1 calc R . .
C204 C 0.3679(15) 0.4269(16) -0.0501(12) 0.201(7) Uani 1 1 d DU . .
H204 H 0.3182 0.4685 -0.0932 0.241 Uiso 1 1 calc R . .
C205 C 0.4436(19) 0.4362(17) -0.0485(14) 0.214(8) Uani 1 1 d DU . .
H205 H 0.4459 0.4861 -0.0903 0.257 Uiso 1 1 calc R . .
C206 C 0.5190(16) 0.3734(19) 0.0139(16) 0.216(8) Uani 1 1 d DU . .
H206 H 0.5705 0.3824 0.0133 0.259 Uiso 1 1 calc R . .
C301 C 0.9296(17) 0.492(2) 0.0388(18) 0.242(17) Uani 1 1 d D . .
H301 H 0.8827 0.4862 0.0655 0.29 Uiso 1 1 calc R . .
C302 C 0.978(3) 0.4362(19) 0.011(2) 0.26(2) Uani 1 1 d D . .
H302 H 0.9635 0.3911 0.017 0.307 Uiso 1 1 calc R . .
C303 C 1.049(3) 0.4415(18) -0.027(2) 0.26(2) Uani 1 1 d D . .
H303 H 1.0821 0.3999 -0.0442 0.309 Uiso 1 1 calc R . .
C401 C -0.0581(10) 0.0888(10) 0.4739(9) 0.110(4) Uani 1 1 d . . .
H401 H -0.0978 0.149 0.4575 0.132 Uiso 1 1 calc R . .
C402 C 0.0122(10) 0.0422(11) 0.5375(8) 0.101(4) Uani 1 1 d . . .
H402 H 0.0214 0.0718 0.563 0.121 Uiso 1 1 calc R . .
C403 C 0.0713(10) -0.0485(11) 0.5660(8) 0.105(4) Uani 1 1 d . . .
H403 H 0.1183 -0.0804 0.611 0.126 Uiso 1 1 calc R . .
 
loop_
    _atom_site_aniso_label
    _atom_site_aniso_U_11
    _atom_site_aniso_U_22
    _atom_site_aniso_U_33
    _atom_site_aniso_U_23
    _atom_site_aniso_U_13
    _atom_site_aniso_U_12
Ru1 0.0233(2) 0.0323(2) 0.0322(2) -0.00760(19) 0.00207(17) -0.01204(18)
Ru2 0.0233(2) 0.0327(2) 0.0327(2) -0.00715(19) 0.00219(17) -0.01229(18)
Cl1 0.0279(7) 0.0390(7) 0.0335(7) -0.0087(6) 0.0028(5) -0.0159(6)
Cl2 0.0281(7) 0.0378(7) 0.0378(7) -0.0119(6) 0.0024(5) -0.0145(6)
Cl3 0.0294(7) 0.0331(7) 0.0376(7) -0.0065(6) 0.0012(5) -0.0139(6)
Ag1 0.0765(4) 0.0597(4) 0.0647(4) -0.0211(3) 0.0067(3) -0.0226(3)
Cl11 0.171(4) 0.0735(17) 0.094(2) -0.0082(15) 0.017(2) -0.050(2)
Cl12 0.0575(11) 0.0536(10) 0.0764(13) -0.0241(10) -0.0161(10) -0.0141(9)
C1 0.048(4) 0.061(4) 0.034(3) -0.015(3) 0.004(3) -0.031(3)
N21 0.028(3) 0.043(3) 0.045(3) -0.012(2) 0.008(2) -0.019(2)
C22 0.030(3) 0.034(3) 0.038(3) -0.007(3) 0.005(2) -0.012(2)
N23 0.035(3) 0.046(3) 0.039(3) -0.016(2) 0.009(2) -0.019(2)
C23A 0.042(4) 0.044(4) 0.048(4) -0.014(3) 0.012(3) -0.023(3)
C24 0.061(5) 0.060(5) 0.057(4) -0.029(4) 0.023(4) -0.034(4)
O24 0.082(4) 0.106(5) 0.060(3) -0.047(3) 0.037(3) -0.062(4)
C241 0.098(7) 0.080(6) 0.052(5) -0.029(4) 0.030(5) -0.049(6)
C242 0.125(11) 0.127(11) 0.079(7) -0.059(8) 0.033(7) -0.065(9)
C243 0.153(14) 0.089(9) 0.084(8) -0.027(7) -0.019(9) -0.027(9)
C244 0.131(13) 0.188(17) 0.112(11) -0.073(12) -0.024(10) -0.052(12)
C25 0.070(6) 0.085(6) 0.074(6) -0.043(5) 0.042(5) -0.049(5)
C26 0.048(4) 0.082(6) 0.079(6) -0.036(5) 0.031(4) -0.038(4)
C27 0.039(4) 0.055(4) 0.069(5) -0.023(4) 0.021(4) -0.024(3)
O27 0.034(2) 0.072(3) 0.073(4) -0.031(3) 0.016(2) -0.027(2)
C271 0.029(4) 0.072(5) 0.078(6) -0.012(5) 0.006(4) -0.021(4)
C272 0.032(4) 0.050(4) 0.083(6) -0.018(4) 0.004(4) -0.016(3)
C273 0.051(5) 0.070(6) 0.078(6) -0.009(5) -0.018(4) -0.024(4)
C274 0.076(7) 0.097(8) 0.089(7) -0.030(6) -0.006(5) -0.044(6)
C27A 0.039(3) 0.045(4) 0.045(4) -0.015(3) 0.012(3) -0.021(3)
C2 0.026(3) 0.050(4) 0.047(4) -0.014(3) 0.006(3) -0.021(3)
C31 0.031(3) 0.043(3) 0.044(3) -0.022(3) 0.008(3) -0.018(3)
C32 0.029(3) 0.038(3) 0.045(3) -0.017(3) 0.002(3) -0.017(3)
C33 0.040(3) 0.046(4) 0.042(4) -0.012(3) 0.005(3) -0.028(3)
C34 0.042(4) 0.034(3) 0.063(4) -0.016(3) -0.002(3) -0.015(3)
C35 0.035(3) 0.041(4) 0.062(4) -0.024(3) 0.003(3) -0.010(3)
C36 0.034(3) 0.045(4) 0.048(4) -0.017(3) 0.007(3) -0.014(3)
C3 0.042(3) 0.045(4) 0.034(3) -0.012(3) 0.004(3) -0.024(3)
N41 0.028(2) 0.031(3) 0.044(3) -0.012(2) 0.005(2) -0.010(2)
C42 0.029(3) 0.041(3) 0.039(3) -0.012(3) 0.005(2) -0.021(3)
N43 0.030(3) 0.036(3) 0.032(3) -0.005(2) -0.002(2) -0.012(2)
C43A 0.031(3) 0.038(3) 0.040(3) -0.009(3) 0.006(3) -0.019(3)
C44 0.026(3) 0.040(3) 0.039(3) -0.005(3) -0.004(2) -0.013(3)
O44 0.053(3) 0.045(3) 0.037(2) -0.011(2) -0.001(2) -0.018(2)
C441 0.043(4) 0.051(4) 0.040(4) -0.008(3) -0.002(3) -0.025(3)
C442 0.065(5) 0.063(5) 0.051(4) -0.022(4) 0.004(4) -0.032(4)
C443 0.088(7) 0.107(8) 0.061(6) -0.043(6) -0.001(5) -0.031(6)
C444 0.141(12) 0.143(12) 0.092(9) -0.075(9) 0.033(8) -0.061(10)
C45 0.039(3) 0.042(4) 0.038(3) -0.001(3) -0.004(3) -0.019(3)
C46 0.035(3) 0.033(3) 0.050(4) -0.007(3) 0.000(3) -0.008(3)
C47 0.030(3) 0.035(3) 0.048(4) -0.013(3) 0.003(3) -0.008(3)
O47 0.053(3) 0.034(2) 0.052(3) -0.013(2) 0.001(2) -0.008(2)
C471 0.061(5) 0.040(4) 0.065(5) -0.018(4) -0.001(4) -0.010(3)
C472 0.121(8) 0.043(4) 0.089(6) -0.033(4) 0.000(5) -0.007(5)
C473 0.152(8) 0.074(5) 0.100(6) -0.038(5) -0.022(6) -0.026(6)
C474 0.190(11) 0.091(7) 0.109(8) -0.053(6) -0.026(7) -0.016(7)
C47A 0.028(3) 0.035(3) 0.040(3) -0.005(3) 0.002(2) -0.013(3)
C4 0.037(3) 0.039(3) 0.050(4) -0.020(3) 0.007(3) -0.010(3)
C5 0.039(4) 0.051(4) 0.058(4) -0.024(3) 0.006(3) -0.021(3)
N61 0.031(3) 0.040(3) 0.047(3) -0.018(2) 0.009(2) -0.016(2)
C62 0.026(3) 0.032(3) 0.037(3) -0.011(3) 0.005(2) -0.010(2)
N63 0.025(2) 0.041(3) 0.053(3) -0.017(3) 0.008(2) -0.012(2)
C63A 0.034(3) 0.044(4) 0.064(4) -0.021(3) 0.017(3) -0.019(3)
C64 0.052(4) 0.064(5) 0.079(6) -0.040(4) 0.026(4) -0.030(4)
O64 0.061(3) 0.095(4) 0.093(4) -0.068(4) 0.034(3) -0.039(3)
C641 0.101(9) 0.140(11) 0.129(10) -0.100(9) 0.075(8) -0.074(8)
C642 0.123(10) 0.098(8) 0.079(7) -0.056(7) 0.035(7) -0.038(8)
C643 0.093(8) 0.117(10) 0.093(8) -0.059(8) 0.008(7) -0.040(8)
C644 0.156(15) 0.115(12) 0.134(13) -0.053(10) 0.012(11) -0.059(11)
C65 0.047(4) 0.072(5) 0.107(7) -0.052(5) 0.036(5) -0.030(4)
C66 0.038(4) 0.069(5) 0.107(7) -0.045(5) 0.023(4) -0.025(4)
C67 0.032(3) 0.048(4) 0.076(5) -0.020(4) 0.014(3) -0.015(3)
O67 0.025(2) 0.060(3) 0.069(3) -0.020(3) 0.000(2) -0.013(2)
C671 0.034(4) 0.065(5) 0.079(6) -0.022(4) 0.008(4) -0.016(4)
C672 0.047(5) 0.073(6) 0.107(8) -0.036(6) -0.009(5) -0.018(4)
C673 0.062(6) 0.092(7) 0.096(7) -0.026(6) -0.005(5) -0.043(5)
C674 0.053(6) 0.136(11) 0.114(10) -0.057(9) -0.017(6) -0.015(6)
C67A 0.037(3) 0.039(3) 0.055(4) -0.016(3) 0.010(3) -0.017(3)
C6 0.027(3) 0.041(3) 0.052(4) -0.011(3) -0.004(3) -0.010(3)
C71 0.030(3) 0.042(3) 0.036(3) -0.013(3) 0.000(2) -0.016(3)
C72 0.032(3) 0.035(3) 0.037(3) -0.004(3) -0.005(3) -0.015(3)
C73 0.029(3) 0.042(4) 0.042(4) -0.006(3) -0.007(3) -0.010(3)
C74 0.045(4) 0.052(4) 0.038(4) -0.003(3) -0.001(3) -0.027(3)
C75 0.041(4) 0.061(4) 0.034(3) -0.014(3) 0.001(3) -0.026(3)
C76 0.032(3) 0.056(4) 0.043(4) -0.020(3) 0.000(3) -0.019(3)
C7 0.038(3) 0.048(4) 0.044(4) -0.010(3) 0.002(3) -0.020(3)
N81 0.031(3) 0.042(3) 0.042(3) -0.015(2) 0.008(2) -0.019(2)
C82 0.024(3) 0.033(3) 0.038(3) -0.008(3) 0.003(2) -0.008(2)
N83 0.035(3) 0.036(3) 0.042(3) -0.009(2) 0.001(2) -0.015(2)
C83A 0.032(3) 0.038(3) 0.048(4) -0.017(3) 0.020(3) -0.018(3)
C84 0.045(4) 0.050(4) 0.064(5) -0.026(4) 0.006(3) -0.023(3)
O84 0.080(4) 0.056(3) 0.068(4) -0.026(3) 0.012(3) -0.044(3)
C841 0.116(9) 0.073(6) 0.090(7) -0.040(6) 0.011(6) -0.054(6)
C842 0.135(10) 0.087(7) 0.089(8) -0.046(6) 0.004(7) -0.061(8)
C843 0.146(13) 0.106(10) 0.093(9) -0.030(8) 0.004(9) -0.052(10)
C844 0.201(19) 0.124(12) 0.106(11) -0.042(10) -0.003(11) -0.084(13)
C85 0.058(5) 0.058(5) 0.084(6) -0.021(4) 0.009(4) -0.038(4)
C86 0.063(5) 0.058(5) 0.065(5) -0.015(4) 0.014(4) -0.036(4)
C87 0.034(3) 0.046(4) 0.063(5) -0.015(3) 0.009(3) -0.022(3)
O87 0.060(3) 0.062(3) 0.049(3) -0.013(2) 0.017(2) -0.042(3)
C871 0.082(6) 0.073(6) 0.070(6) -0.022(5) 0.033(5) -0.057(5)
C872 0.093(8) 0.118(9) 0.066(6) -0.016(6) 0.032(6) -0.065(7)
C873 0.070(7) 0.081(7) 0.076(7) -0.001(6) 0.018(5) -0.011(5)
C874 0.158(14) 0.196(17) 0.095(9) -0.086(11) 0.047(9) -0.112(14)
C87A 0.052(4) 0.026(3) 0.060(4) -0.021(3) 0.035(3) -0.026(3)
C8 0.044(4) 0.054(4) 0.043(4) -0.021(3) 0.013(3) -0.030(3)
C101 0.29(3) 0.117(13) 0.082(10) -0.027(9) -0.037(15) -0.079(19)
C102 0.30(4) 0.17(2) 0.22(3) -0.10(2) -0.05(3) -0.05(2)
C103 0.29(4) 0.21(3) 0.23(3) -0.14(3) -0.06(3) -0.07(3)
C104 0.36(6) 0.17(2) 0.099(14) -0.044(14) 0.04(2) -0.12(3)
C105 0.28(4) 0.141(19) 0.25(4) -0.08(2) 0.09(3) -0.12(2)
C106 0.44(7) 0.18(3) 0.24(4) -0.12(3) 0.06(4) -0.18(4)
C201 0.227(15) 0.269(18) 0.205(15) -0.163(13) 0.102(12) -0.169(14)
C202 0.222(16) 0.257(17) 0.212(15) -0.171(13) 0.115(12) -0.159(14)
C203 0.220(15) 0.256(18) 0.220(16) -0.193(14) 0.101(12) -0.144(14)
C204 0.231(16) 0.270(18) 0.195(14) -0.182(13) 0.104(13) -0.121(15)
C205 0.245(18) 0.268(18) 0.200(15) -0.147(14) 0.115(14) -0.144(15)
C206 0.238(16) 0.281(19) 0.219(17) -0.141(15) 0.103(13) -0.175(15)
C301 0.17(2) 0.098(14) 0.26(3) 0.049(19) -0.08(2) -0.039(17)
C302 0.24(4) 0.095(18) 0.29(4) 0.01(2) -0.17(3) -0.06(2)
C303 0.24(4) 0.10(2) 0.28(4) 0.00(2) -0.16(3) -0.04(2)
C401 0.107(10) 0.114(10) 0.134(12) -0.061(9) 0.040(9) -0.071(9)
C402 0.116(10) 0.135(11) 0.103(9) -0.073(9) 0.041(8) -0.084(9)
C403 0.102(9) 0.157(13) 0.105(9) -0.076(10) 0.046(7) -0.087(10)
 
 
#----------------------------------------------------------------------------#
#                   MOLECULAR GEOMETRY                                       #
#----------------------------------------------------------------------------#
 
_geom_special_details
;
 All s.u.'s (except the s.u. in the dihedral angle between two l.s. planes)
 are estimated using the full covariance matrix.  The cell s.u.'s are taken
 into account individually in the estimation of s.u.'s in distances, angles
 and torsion angles; correlations between s.u.'s in cell parameters are only
 used when they are defined by crystal symmetry.  An approximate (isotropic)
 treatment of cell s.u.'s is used for estimating s.u.'s involving l.s. planes.
;
loop_
    _geom_bond_atom_site_label_1
    _geom_bond_atom_site_label_2
    _geom_bond_distance
    _geom_bond_site_symmetry_2
    _geom_bond_publ_flag
Ru1 C42 1.967(6) . ?
Ru1 C22 2.004(6) . ?
Ru1 C32 2.299(6) . ?
Ru1 C31 2.331(6) . ?
Ru1 Cl2 2.4235(15) . ?
Ru1 Cl1 2.5069(14) . ?
Ru1 Cl3 2.5289(14) . ?
Ru2 C82 1.994(6) . ?
Ru2 C62 1.997(6) . ?
Ru2 C71 2.321(6) . ?
Ru2 C72 2.327(6) . ?
Ru2 Cl1 2.4215(14) . ?
Ru2 Cl3 2.5278(14) . ?
Ru2 Cl2 2.5307(15) . ?
Ag1 Cl11 2.313(3) . ?
Ag1 Cl12 2.315(2) . ?
C1 N23 1.483(8) . ?
C1 H1A 0.98 . ?
C1 H1B 0.98 . ?
C1 H1C 0.98 . ?
N21 C22 1.371(8) . ?
N21 C27A 1.393(9) . ?
N21 C2 1.441(9) . ?
C22 N23 1.345(9) . ?
N23 C23A 1.397(9) . ?
C23A C27A 1.376(10) . ?
C23A C24 1.392(11) . ?
C24 O24 1.366(10) . ?
C24 C25 1.386(12) . ?
O24 C241 1.407(10) . ?
C241 C242 1.456(16) . ?
C241 H24A 0.99 . ?
C241 H24B 0.99 . ?
C242 C243 1.447(14) . ?
C242 H24C 0.99 . ?
C242 H24D 0.99 . ?
C243 C244 1.57(2) . ?
C243 H24E 0.99 . ?
C243 H24F 0.99 . ?
C244 H24G 0.98 . ?
C244 H24H 0.98 . ?
C244 H24I 0.98 . ?
C25 C26 1.393(14) . ?
C25 H25 0.95 . ?
C26 C27 1.366(12) . ?
C26 H26 0.95 . ?
C27 O27 1.378(10) . ?
C27 C27A 1.405(10) . ?
O27 C271 1.424(9) . ?
C271 C272 1.499(13) . ?
C271 H27A 0.99 . ?
C271 H27B 0.99 . ?
C272 C273 1.481(14) . ?
C272 H27C 0.99 . ?
C272 H27D 0.99 . ?
C273 C274 1.515(14) . ?
C273 H27E 0.99 . ?
C273 H27F 0.99 . ?
C274 H27G 0.98 . ?
C274 H27H 0.98 . ?
C274 H27I 0.98 . ?
C2 C32 1.535(9) . ?
C2 H2A 0.99 . ?
C2 H2B 0.99 . ?
C31 C32 1.405(9) . ?
C31 C36 1.453(9) . ?
C31 C3 1.523(9) . ?
C32 C33 1.435(9) . ?
C33 C34 1.333(10) . ?
C33 H33 0.95 . ?
C34 C35 1.404(11) . ?
C34 H34 0.95 . ?
C35 C36 1.348(10) . ?
C35 H35 0.95 . ?
C36 H36 0.95 . ?
C3 N43 1.461(9) . ?
C3 H3A 0.99 . ?
C3 H3B 0.99 . ?
N41 C42 1.372(8) . ?
N41 C47A 1.400(8) . ?
N41 C4 1.458(9) . ?
C42 N43 1.339(8) . ?
N43 C43A 1.397(8) . ?
C43A C47A 1.369(10) . ?
C43A C44 1.414(9) . ?
C44 O44 1.348(9) . ?
C44 C45 1.379(10) . ?
O44 C441 1.431(8) . ?
C441 C442 1.500(12) . ?
C441 H44A 0.99 . ?
C441 H44B 0.99 . ?
C442 C443 1.500(12) . ?
C442 H44C 0.99 . ?
C442 H44D 0.99 . ?
C443 C444 1.532(17) . ?
C443 H44E 0.99 . ?
C443 H44F 0.99 . ?
C444 H44G 0.98 . ?
C444 H44H 0.98 . ?
C444 H44I 0.98 . ?
C45 C46 1.393(11) . ?
C45 H45 0.95 . ?
C46 C47 1.382(10) . ?
C46 H46 0.95 . ?
C47 O47 1.366(9) . ?
C47 C47A 1.408(9) . ?
O47 C471 1.440(9) . ?
C471 C472 1.491(14) . ?
C471 H47A 0.99 . ?
C471 H47B 0.99 . ?
C472 C473 1.513(18) . ?
C472 H47C 0.99 . ?
C472 H47D 0.99 . ?
C473 C474 1.538(18) . ?
C473 H47E 0.99 . ?
C473 H47F 0.99 . ?
C474 H47G 0.98 . ?
C474 H47H 0.98 . ?
C474 H47I 0.98 . ?
C4 H4A 0.98 . ?
C4 H4B 0.98 . ?
C4 H4C 0.98 . ?
C5 N63 1.463(9) . ?
C5 H5A 0.98 . ?
C5 H5B 0.98 . ?
C5 H5C 0.98 . ?
N61 C67A 1.377(9) . ?
N61 C62 1.381(8) . ?
N61 C6 1.448(9) . ?
C62 N63 1.352(9) . ?
N63 C63A 1.416(8) . ?
C63A C67A 1.369(11) . ?
C63A C64 1.385(11) . ?
C64 O64 1.368(11) . ?
C64 C65 1.405(12) . ?
O64 C641 1.424(12) . ?
C641 C642 1.509(18) . ?
C641 H64A 0.99 . ?
C641 H64B 0.99 . ?
C642 C643 1.495(18) . ?
C642 H64C 0.99 . ?
C642 H64D 0.99 . ?
C643 C644 1.506(19) . ?
C643 H64E 0.99 . ?
C643 H64F 0.99 . ?
C644 H64G 0.98 . ?
C644 H64H 0.98 . ?
C644 H64I 0.98 . ?
C65 C66 1.418(14) . ?
C65 H65 0.95 . ?
C66 C67 1.355(13) . ?
C66 H66 0.95 . ?
C67 O67 1.370(11) . ?
C67 C67A 1.421(10) . ?
O67 C671 1.447(9) . ?
C671 C672 1.501(14) . ?
C671 H67A 0.99 . ?
C671 H67B 0.99 . ?
C672 C673 1.531(13) . ?
C672 H67C 0.99 . ?
C672 H67D 0.99 . ?
C673 C674 1.479(16) . ?
C673 H67E 0.99 . ?
C673 H67F 0.99 . ?
C674 H67G 0.98 . ?
C674 H67H 0.98 . ?
C674 H67I 0.98 . ?
C6 C72 1.515(10) . ?
C6 H6A 0.99 . ?
C6 H6B 0.99 . ?
C71 C72 1.407(9) . ?
C71 C76 1.461(9) . ?
C71 C7 1.517(10) . ?
C72 C73 1.440(9) . ?
C73 C74 1.356(10) . ?
C73 H73 0.95 . ?
C74 C75 1.412(11) . ?
C74 H74 0.95 . ?
C75 C76 1.343(10) . ?
C75 H75 0.95 . ?
C76 H76 0.95 . ?
C7 N83 1.442(9) . ?
C7 H7A 0.99 . ?
C7 H7B 0.99 . ?
N81 C82 1.342(8) . ?
N81 C87A 1.443(8) . ?
N81 C8 1.457(9) . ?
C82 N83 1.352(9) . ?
N83 C83A 1.374(8) . ?
C83A C87A 1.350(10) . ?
C83A C84 1.399(10) . ?
C84 O84 1.368(10) . ?
C84 C85 1.392(12) . ?
O84 C841 1.447(11) . ?
C841 C842 1.494(15) . ?
C841 H84A 0.99 . ?
C841 H84B 0.99 . ?
C842 C843 1.523(18) . ?
C842 H84C 0.99 . ?
C842 H84D 0.99 . ?
C843 C844 1.473(19) . ?
C843 H84E 0.99 . ?
C843 H84F 0.99 . ?
C844 H84G 0.98 . ?
C844 H84H 0.98 . ?
C844 H84I 0.98 . ?
C85 C86 1.380(13) . ?
C85 H85 0.95 . ?
C86 C87 1.364(12) . ?
C86 H86 0.95 . ?
C87 O87 1.367(10) . ?
C87 C87A 1.420(9) . ?
O87 C871 1.424(9) . ?
C871 C872 1.560(16) . ?
C871 H87A 0.99 . ?
C871 H87B 0.99 . ?
C872 C873 1.455(13) . ?
C872 H87C 0.99 . ?
C872 H87D 0.99 . ?
C873 C874 1.590(18) . ?
C873 H87E 0.99 . ?
C873 H87F 0.99 . ?
C874 H87G 0.98 . ?
C874 H87H 0.98 . ?
C874 H87I 0.98 . ?
C8 H8A 0.98 . ?
C8 H8B 0.98 . ?
C8 H8C 0.98 . ?
C101 C102 1.34(2) . ?
C101 C106 1.39(2) . ?
C101 H101 0.95 . ?
C102 C103 1.39(2) . ?
C102 H102 0.95 . ?
C103 C104 1.39(2) . ?
C103 H103 0.95 . ?
C104 C105 1.38(2) . ?
C104 H104 0.95 . ?
C105 C106 1.38(2) . ?
C105 H105 0.95 . ?
C106 H106 0.95 . ?
C201 C206 1.38(2) . ?
C201 C202 1.40(2) . ?
C201 H201 0.95 . ?
C202 C203 1.39(2) . ?
C202 H202 0.95 . ?
C203 C204 1.40(2) . ?
C203 H203 0.95 . ?
C204 C205 1.36(2) . ?
C204 H204 0.95 . ?
C205 C206 1.41(2) . ?
C205 H205 0.95 . ?
C206 H206 0.95 . ?
C301 C302 1.362(19) . ?
C301 C303 1.375(18) 2_765 ?
C301 H301 0.95 . ?
C302 C303 1.383(19) . ?
C302 H302 0.95 . ?
C303 C301 1.375(18) 2_765 ?
C303 H303 0.95 . ?
C401 C403 1.377(18) 2_556 ?
C401 C402 1.378(19) . ?
C401 H401 0.95 . ?
C402 C403 1.42(2) . ?
C402 H402 0.95 . ?
C403 C401 1.377(18) 2_556 ?
C403 H403 0.95 . ?
 
loop_
    _geom_angle_atom_site_label_1
    _geom_angle_atom_site_label_2
    _geom_angle_atom_site_label_3
    _geom_angle
    _geom_angle_site_symmetry_1
    _geom_angle_site_symmetry_3
    _geom_angle_publ_flag
C42 Ru1 C22 88.7(2) . . ?
C42 Ru1 C32 87.5(2) . . ?
C22 Ru1 C32 73.2(3) . . ?
C42 Ru1 C31 77.6(2) . . ?
C22 Ru1 C31 106.8(2) . . ?
C32 Ru1 C31 35.3(2) . . ?
C42 Ru1 Cl2 91.85(18) . . ?
C22 Ru1 Cl2 96.1(2) . . ?
C32 Ru1 Cl2 169.36(17) . . ?
C31 Ru1 Cl2 154.33(16) . . ?
C42 Ru1 Cl1 89.78(18) . . ?
C22 Ru1 Cl1 172.6(2) . . ?
C32 Ru1 Cl1 113.90(17) . . ?
C31 Ru1 Cl1 79.88(16) . . ?
Cl2 Ru1 Cl1 76.70(5) . . ?
C42 Ru1 Cl3 169.48(17) . . ?
C22 Ru1 Cl3 100.45(17) . . ?
C32 Ru1 Cl3 100.02(16) . . ?
C31 Ru1 Cl3 104.29(16) . . ?
Cl2 Ru1 Cl3 82.14(5) . . ?
Cl1 Ru1 Cl3 80.47(5) . . ?
C82 Ru2 C62 87.9(2) . . ?
C82 Ru2 C71 78.5(2) . . ?
C62 Ru2 C71 107.4(2) . . ?
C82 Ru2 C72 88.8(2) . . ?
C62 Ru2 C72 74.3(2) . . ?
C71 Ru2 C72 35.2(2) . . ?
C82 Ru2 Cl1 91.95(18) . . ?
C62 Ru2 Cl1 96.29(18) . . ?
C71 Ru2 Cl1 153.90(16) . . ?
C72 Ru2 Cl1 170.49(18) . . ?
C82 Ru2 Cl3 173.15(16) . . ?
C62 Ru2 Cl3 96.19(17) . . ?
C71 Ru2 Cl3 105.42(16) . . ?
C72 Ru2 Cl3 97.64(16) . . ?
Cl1 Ru2 Cl3 82.15(5) . . ?
C82 Ru2 Cl2 95.18(17) . . ?
C62 Ru2 Cl2 172.03(18) . . ?
C71 Ru2 Cl2 80.43(16) . . ?
C72 Ru2 Cl2 113.10(18) . . ?
Cl1 Ru2 Cl2 76.29(5) . . ?
Cl3 Ru2 Cl2 80.09(5) . . ?
Ru2 Cl1 Ru1 85.68(5) . . ?
Ru1 Cl2 Ru2 85.12(5) . . ?
Ru2 Cl3 Ru1 83.03(4) . . ?
Cl11 Ag1 Cl12 170.24(13) . . ?
N23 C1 H1A 109.5 . . ?
N23 C1 H1B 109.5 . . ?
H1A C1 H1B 109.5 . . ?
N23 C1 H1C 109.5 . . ?
H1A C1 H1C 109.5 . . ?
H1B C1 H1C 109.5 . . ?
C22 N21 C27A 110.5(6) . . ?
C22 N21 C2 117.5(5) . . ?
C27A N21 C2 130.9(5) . . ?
N23 C22 N21 105.5(5) . . ?
N23 C22 Ru1 136.6(5) . . ?
N21 C22 Ru1 117.7(5) . . ?
C22 N23 C23A 111.2(6) . . ?
C22 N23 C1 123.8(5) . . ?
C23A N23 C1 124.8(6) . . ?
C27A C23A C24 120.7(7) . . ?
C27A C23A N23 106.3(6) . . ?
C24 C23A N23 133.0(7) . . ?
O24 C24 C25 125.9(7) . . ?
O24 C24 C23A 117.4(7) . . ?
C25 C24 C23A 116.7(8) . . ?
C24 O24 C241 118.8(7) . . ?
O24 C241 C242 109.4(9) . . ?
O24 C241 H24A 109.8 . . ?
C242 C241 H24A 109.8 . . ?
O24 C241 H24B 109.8 . . ?
C242 C241 H24B 109.8 . . ?
H24A C241 H24B 108.3 . . ?
C243 C242 C241 114.3(12) . . ?
C243 C242 H24C 108.7 . . ?
C241 C242 H24C 108.7 . . ?
C243 C242 H24D 108.7 . . ?
C241 C242 H24D 108.7 . . ?
H24C C242 H24D 107.6 . . ?
C242 C243 C244 113.6(13) . . ?
C242 C243 H24E 108.8 . . ?
C244 C243 H24E 108.8 . . ?
C242 C243 H24F 108.8 . . ?
C244 C243 H24F 108.8 . . ?
H24E C243 H24F 107.7 . . ?
C243 C244 H24G 109.5 . . ?
C243 C244 H24H 109.5 . . ?
H24G C244 H24H 109.5 . . ?
C243 C244 H24I 109.5 . . ?
H24G C244 H24I 109.5 . . ?
H24H C244 H24I 109.5 . . ?
C24 C25 C26 122.2(8) . . ?
C24 C25 H25 118.9 . . ?
C26 C25 H25 118.9 . . ?
C27 C26 C25 121.2(8) . . ?
C27 C26 H26 119.4 . . ?
C25 C26 H26 119.4 . . ?
C26 C27 O27 126.8(7) . . ?
C26 C27 C27A 116.6(8) . . ?
O27 C27 C27A 116.6(7) . . ?
C27 O27 C271 117.4(6) . . ?
O27 C271 C272 108.3(7) . . ?
O27 C271 H27A 110 . . ?
C272 C271 H27A 110 . . ?
O27 C271 H27B 110 . . ?
C272 C271 H27B 110 . . ?
H27A C271 H27B 108.4 . . ?
C273 C272 C271 116.0(7) . . ?
C273 C272 H27C 108.3 . . ?
C271 C272 H27C 108.3 . . ?
C273 C272 H27D 108.3 . . ?
C271 C272 H27D 108.3 . . ?
H27C C272 H27D 107.4 . . ?
C272 C273 C274 114.4(8) . . ?
C272 C273 H27E 108.7 . . ?
C274 C273 H27E 108.7 . . ?
C272 C273 H27F 108.7 . . ?
C274 C273 H27F 108.7 . . ?
H27E C273 H27F 107.6 . . ?
C273 C274 H27G 109.5 . . ?
C273 C274 H27H 109.5 . . ?
H27G C274 H27H 109.5 . . ?
C273 C274 H27I 109.5 . . ?
H27G C274 H27I 109.5 . . ?
H27H C274 H27I 109.5 . . ?
C23A C27A N21 106.4(6) . . ?
C23A C27A C27 122.3(7) . . ?
N21 C27A C27 131.2(7) . . ?
N21 C2 C32 106.5(5) . . ?
N21 C2 H2A 110.4 . . ?
C32 C2 H2A 110.4 . . ?
N21 C2 H2B 110.4 . . ?
C32 C2 H2B 110.4 . . ?
H2A C2 H2B 108.6 . . ?
C32 C31 C36 116.0(6) . . ?
C32 C31 C3 126.3(6) . . ?
C36 C31 C3 113.7(6) . . ?
C32 C31 Ru1 71.1(4) . . ?
C36 C31 Ru1 114.1(4) . . ?
C3 C31 Ru1 105.5(4) . . ?
C31 C32 C33 119.6(6) . . ?
C31 C32 C2 123.3(6) . . ?
C33 C32 C2 114.3(6) . . ?
C31 C32 Ru1 73.6(3) . . ?
C33 C32 Ru1 111.2(4) . . ?
C2 C32 Ru1 102.8(4) . . ?
C34 C33 C32 121.9(6) . . ?
C34 C33 H33 119 . . ?
C32 C33 H33 119 . . ?
C33 C34 C35 119.6(6) . . ?
C33 C34 H34 120.2 . . ?
C35 C34 H34 120.2 . . ?
C36 C35 C34 120.8(7) . . ?
C36 C35 H35 119.6 . . ?
C34 C35 H35 119.6 . . ?
C35 C36 C31 121.9(7) . . ?
C35 C36 H36 119 . . ?
C31 C36 H36 119 . . ?
N43 C3 C31 111.2(5) . . ?
N43 C3 H3A 109.4 . . ?
C31 C3 H3A 109.4 . . ?
N43 C3 H3B 109.4 . . ?
C31 C3 H3B 109.4 . . ?
H3A C3 H3B 108 . . ?
C42 N41 C47A 109.2(5) . . ?
C42 N41 C4 125.9(5) . . ?
C47A N41 C4 124.7(5) . . ?
N43 C42 N41 106.5(5) . . ?
N43 C42 Ru1 119.7(5) . . ?
N41 C42 Ru1 133.7(5) . . ?
C42 N43 C43A 110.8(5) . . ?
C42 N43 C3 120.5(5) . . ?
C43A N43 C3 128.3(5) . . ?
C47A C43A N43 106.3(5) . . ?
C47A C43A C44 122.6(6) . . ?
N43 C43A C44 130.9(6) . . ?
O44 C44 C45 127.9(6) . . ?
O44 C44 C43A 116.6(6) . . ?
C45 C44 C43A 115.3(6) . . ?
C44 O44 C441 117.8(5) . . ?
O44 C441 C442 107.7(6) . . ?
O44 C441 H44A 110.2 . . ?
C442 C441 H44A 110.2 . . ?
O44 C441 H44B 110.2 . . ?
C442 C441 H44B 110.2 . . ?
H44A C441 H44B 108.5 . . ?
C441 C442 C443 113.9(8) . . ?
C441 C442 H44C 108.8 . . ?
C443 C442 H44C 108.8 . . ?
C441 C442 H44D 108.8 . . ?
C443 C442 H44D 108.8 . . ?
H44C C442 H44D 107.7 . . ?
C442 C443 C444 111.0(10) . . ?
C442 C443 H44E 109.4 . . ?
C444 C443 H44E 109.4 . . ?
C442 C443 H44F 109.4 . . ?
C444 C443 H44F 109.4 . . ?
H44E C443 H44F 108 . . ?
C443 C444 H44G 109.5 . . ?
C443 C444 H44H 109.5 . . ?
H44G C444 H44H 109.5 . . ?
C443 C444 H44I 109.5 . . ?
H44G C444 H44I 109.5 . . ?
H44H C444 H44I 109.5 . . ?
C44 C45 C46 122.4(6) . . ?
C44 C45 H45 118.8 . . ?
C46 C45 H45 118.8 . . ?
C47 C46 C45 121.9(6) . . ?
C47 C46 H46 119 . . ?
C45 C46 H46 119 . . ?
O47 C47 C46 126.6(6) . . ?
O47 C47 C47A 117.1(6) . . ?
C46 C47 C47A 116.3(7) . . ?
C47 O47 C471 118.1(6) . . ?
O47 C471 C472 107.2(7) . . ?
O47 C471 H47A 110.3 . . ?
C472 C471 H47A 110.3 . . ?
O47 C471 H47B 110.3 . . ?
C472 C471 H47B 110.3 . . ?
H47A C471 H47B 108.5 . . ?
C471 C472 C473 114.2(10) . . ?
C471 C472 H47C 108.7 . . ?
C473 C472 H47C 108.7 . . ?
C471 C472 H47D 108.7 . . ?
C473 C472 H47D 108.7 . . ?
H47C C472 H47D 107.6 . . ?
C472 C473 C474 109.8(13) . . ?
C472 C473 H47E 109.7 . . ?
C474 C473 H47E 109.7 . . ?
C472 C473 H47F 109.7 . . ?
C474 C473 H47F 109.7 . . ?
H47E C473 H47F 108.2 . . ?
C473 C474 H47G 109.5 . . ?
C473 C474 H47H 109.5 . . ?
H47G C474 H47H 109.5 . . ?
C473 C474 H47I 109.5 . . ?
H47G C474 H47I 109.5 . . ?
H47H C474 H47I 109.5 . . ?
C43A C47A N41 107.1(5) . . ?
C43A C47A C47 121.3(6) . . ?
N41 C47A C47 131.5(6) . . ?
N41 C4 H4A 109.5 . . ?
N41 C4 H4B 109.5 . . ?
H4A C4 H4B 109.5 . . ?
N41 C4 H4C 109.5 . . ?
H4A C4 H4C 109.5 . . ?
H4B C4 H4C 109.5 . . ?
N63 C5 H5A 109.5 . . ?
N63 C5 H5B 109.5 . . ?
H5A C5 H5B 109.5 . . ?
N63 C5 H5C 109.5 . . ?
H5A C5 H5C 109.5 . . ?
H5B C5 H5C 109.5 . . ?
C67A N61 C62 111.1(6) . . ?
C67A N61 C6 132.1(6) . . ?
C62 N61 C6 116.7(5) . . ?
N63 C62 N61 105.3(5) . . ?
N63 C62 Ru2 135.3(4) . . ?
N61 C62 Ru2 119.2(5) . . ?
C62 N63 C63A 110.2(6) . . ?
C62 N63 C5 124.8(5) . . ?
C63A N63 C5 124.5(6) . . ?
C67A C63A C64 122.9(7) . . ?
C67A C63A N63 106.7(6) . . ?
C64 C63A N63 130.4(7) . . ?
O64 C64 C63A 118.8(7) . . ?
O64 C64 C65 124.9(8) . . ?
C63A C64 C65 116.2(8) . . ?
C64 O64 C641 120.2(7) . . ?
O64 C641 C642 109.1(9) . . ?
O64 C641 H64A 109.9 . . ?
C642 C641 H64A 109.9 . . ?
O64 C641 H64B 109.9 . . ?
C642 C641 H64B 109.9 . . ?
H64A C641 H64B 108.3 . . ?
C643 C642 C641 115.4(10) . . ?
C643 C642 H64C 108.4 . . ?
C641 C642 H64C 108.4 . . ?
C643 C642 H64D 108.4 . . ?
C641 C642 H64D 108.4 . . ?
H64C C642 H64D 107.5 . . ?
C642 C643 C644 109.6(12) . . ?
C642 C643 H64E 109.8 . . ?
C644 C643 H64E 109.8 . . ?
C642 C643 H64F 109.8 . . ?
C644 C643 H64F 109.8 . . ?
H64E C643 H64F 108.2 . . ?
C643 C644 H64G 109.5 . . ?
C643 C644 H64H 109.5 . . ?
H64G C644 H64H 109.5 . . ?
C643 C644 H64I 109.5 . . ?
H64G C644 H64I 109.5 . . ?
H64H C644 H64I 109.5 . . ?
C64 C65 C66 120.3(8) . . ?
C64 C65 H65 119.9 . . ?
C66 C65 H65 119.9 . . ?
C67 C66 C65 122.9(8) . . ?
C67 C66 H66 118.5 . . ?
C65 C66 H66 118.5 . . ?
C66 C67 O67 127.7(7) . . ?
C66 C67 C67A 116.1(8) . . ?
O67 C67 C67A 116.2(7) . . ?
C67 O67 C671 117.4(6) . . ?
O67 C671 C672 106.7(7) . . ?
O67 C671 H67A 110.4 . . ?
C672 C671 H67A 110.4 . . ?
O67 C671 H67B 110.4 . . ?
C672 C671 H67B 110.4 . . ?
H67A C671 H67B 108.6 . . ?
C671 C672 C673 113.4(9) . . ?
C671 C672 H67C 108.9 . . ?
C673 C672 H67C 108.9 . . ?
C671 C672 H67D 108.9 . . ?
C673 C672 H67D 108.9 . . ?
H67C C672 H67D 107.7 . . ?
C674 C673 C672 113.6(9) . . ?
C674 C673 H67E 108.8 . . ?
C672 C673 H67E 108.8 . . ?
C674 C673 H67F 108.8 . . ?
C672 C673 H67F 108.8 . . ?
H67E C673 H67F 107.7 . . ?
C673 C674 H67G 109.5 . . ?
C673 C674 H67H 109.5 . . ?
H67G C674 H67H 109.5 . . ?
C673 C674 H67I 109.5 . . ?
H67G C674 H67I 109.5 . . ?
H67H C674 H67I 109.5 . . ?
C63A C67A N61 106.8(6) . . ?
C63A C67A C67 121.4(7) . . ?
N61 C67A C67 131.8(7) . . ?
N61 C6 C72 108.0(5) . . ?
N61 C6 H6A 110.1 . . ?
C72 C6 H6A 110.1 . . ?
N61 C6 H6B 110.1 . . ?
C72 C6 H6B 110.1 . . ?
H6A C6 H6B 108.4 . . ?
C72 C71 C76 117.7(6) . . ?
C72 C71 C7 124.5(6) . . ?
C76 C71 C7 113.2(6) . . ?
C72 C71 Ru2 72.6(4) . . ?
C76 C71 Ru2 114.6(4) . . ?
C7 C71 Ru2 105.0(4) . . ?
C71 C72 C73 119.0(6) . . ?
C71 C72 C6 125.5(6) . . ?
C73 C72 C6 113.2(6) . . ?
C71 C72 Ru2 72.2(3) . . ?
C73 C72 Ru2 111.5(4) . . ?
C6 C72 Ru2 102.9(4) . . ?
C74 C73 C72 121.4(7) . . ?
C74 C73 H73 119.3 . . ?
C72 C73 H73 119.3 . . ?
C73 C74 C75 119.4(7) . . ?
C73 C74 H74 120.3 . . ?
C75 C74 H74 120.3 . . ?
C76 C75 C74 121.8(7) . . ?
C76 C75 H75 119.1 . . ?
C74 C75 H75 119.1 . . ?
C75 C76 C71 120.6(7) . . ?
C75 C76 H76 119.7 . . ?
C71 C76 H76 119.7 . . ?
N83 C7 C71 113.1(6) . . ?
N83 C7 H7A 109 . . ?
C71 C7 H7A 109 . . ?
N83 C7 H7B 109 . . ?
C71 C7 H7B 109 . . ?
H7A C7 H7B 107.8 . . ?
C82 N81 C87A 108.1(5) . . ?
C82 N81 C8 127.1(5) . . ?
C87A N81 C8 124.6(5) . . ?
N81 C82 N83 107.1(5) . . ?
N81 C82 Ru2 133.9(5) . . ?
N83 C82 Ru2 119.0(4) . . ?
C82 N83 C83A 111.0(5) . . ?
C82 N83 C7 120.1(5) . . ?
C83A N83 C7 128.9(6) . . ?
C87A C83A N83 107.0(6) . . ?
C87A C83A C84 118.8(6) . . ?
N83 C83A C84 134.0(7) . . ?
O84 C84 C85 126.2(7) . . ?
O84 C84 C83A 116.5(7) . . ?
C85 C84 C83A 117.3(8) . . ?
C84 O84 C841 116.5(7) . . ?
O84 C841 C842 107.0(8) . . ?
O84 C841 H84A 110.3 . . ?
C842 C841 H84A 110.3 . . ?
O84 C841 H84B 110.3 . . ?
C842 C841 H84B 110.3 . . ?
H84A C841 H84B 108.6 . . ?
C841 C842 C843 113.7(12) . . ?
C841 C842 H84C 108.8 . . ?
C843 C842 H84C 108.8 . . ?
C841 C842 H84D 108.8 . . ?
C843 C842 H84D 108.8 . . ?
H84C C842 H84D 107.7 . . ?
C844 C843 C842 115.1(14) . . ?
C844 C843 H84E 108.5 . . ?
C842 C843 H84E 108.5 . . ?
C844 C843 H84F 108.5 . . ?
C842 C843 H84F 108.5 . . ?
H84E C843 H84F 107.5 . . ?
C843 C844 H84G 109.5 . . ?
C843 C844 H84H 109.5 . . ?
H84G C844 H84H 109.5 . . ?
C843 C844 H84I 109.5 . . ?
H84G C844 H84I 109.5 . . ?
H84H C844 H84I 109.5 . . ?
C86 C85 C84 122.2(8) . . ?
C86 C85 H85 118.9 . . ?
C84 C85 H85 118.9 . . ?
C87 C86 C85 121.8(8) . . ?
C87 C86 H86 119.1 . . ?
C85 C86 H86 119.1 . . ?
C86 C87 O87 126.0(7) . . ?
C86 C87 C87A 114.8(8) . . ?
O87 C87 C87A 119.1(6) . . ?
C87 O87 C871 117.1(6) . . ?
O87 C871 C872 106.9(7) . . ?
O87 C871 H87A 110.3 . . ?
C872 C871 H87A 110.3 . . ?
O87 C871 H87B 110.3 . . ?
C872 C871 H87B 110.3 . . ?
H87A C871 H87B 108.6 . . ?
C873 C872 C871 109.3(10) . . ?
C873 C872 H87C 109.8 . . ?
C871 C872 H87C 109.8 . . ?
C873 C872 H87D 109.8 . . ?
C871 C872 H87D 109.8 . . ?
H87C C872 H87D 108.3 . . ?
C872 C873 C874 108.2(11) . . ?
C872 C873 H87E 110.1 . . ?
C874 C873 H87E 110.1 . . ?
C872 C873 H87F 110.1 . . ?
C874 C873 H87F 110.1 . . ?
H87E C873 H87F 108.4 . . ?
C873 C874 H87G 109.5 . . ?
C873 C874 H87H 109.5 . . ?
H87G C874 H87H 109.5 . . ?
C873 C874 H87I 109.5 . . ?
H87G C874 H87I 109.5 . . ?
H87H C874 H87I 109.5 . . ?
C83A C87A C87 124.9(6) . . ?
C83A C87A N81 106.6(5) . . ?
C87 C87A N81 128.1(7) . . ?
N81 C8 H8A 109.5 . . ?
N81 C8 H8B 109.5 . . ?
H8A C8 H8B 109.5 . . ?
N81 C8 H8C 109.5 . . ?
H8A C8 H8C 109.5 . . ?
H8B C8 H8C 109.5 . . ?
C102 C101 C106 124.2(18) . . ?
C102 C101 H101 117.9 . . ?
C106 C101 H101 117.9 . . ?
C101 C102 C103 116.7(18) . . ?
C101 C102 H102 121.7 . . ?
C103 C102 H102 121.7 . . ?
C104 C103 C102 120.2(18) . . ?
C104 C103 H103 120 . . ?
C102 C103 H103 120 . . ?
C105 C104 C103 122.0(18) . . ?
C105 C104 H104 119 . . ?
C103 C104 H104 119 . . ?
C104 C105 C106 116.9(18) . . ?
C104 C105 H105 121.6 . . ?
C106 C105 H105 121.6 . . ?
C105 C106 C101 119.3(19) . . ?
C105 C106 H106 120.3 . . ?
C101 C106 H106 120.3 . . ?
C206 C201 C202 116.3(17) . . ?
C206 C201 H201 121.9 . . ?
C202 C201 H201 121.9 . . ?
C203 C202 C201 122.2(18) . . ?
C203 C202 H202 118.9 . . ?
C201 C202 H202 118.9 . . ?
C202 C203 C204 120.2(17) . . ?
C202 C203 H203 119.9 . . ?
C204 C203 H203 119.9 . . ?
C205 C204 C203 118.0(18) . . ?
C205 C204 H204 121 . . ?
C203 C204 H204 121 . . ?
C204 C205 C206 121.6(19) . . ?
C204 C205 H205 119.2 . . ?
C206 C205 H205 119.2 . . ?
C201 C206 C205 121.5(18) . . ?
C201 C206 H206 119.2 . . ?
C205 C206 H206 119.2 . . ?
C302 C301 C303 117(3) . 2_765 ?
C302 C301 H301 121.4 . . ?
C303 C301 H301 121.4 2_765 . ?
C301 C302 C303 123(3) . . ?
C301 C302 H302 118.4 . . ?
C303 C302 H302 118.4 . . ?
C301 C303 C302 120(3) 2_765 . ?
C301 C303 H303 120.2 2_765 . ?
C302 C303 H303 120.2 . . ?
C403 C401 C402 120.4(14) 2_556 . ?
C403 C401 H401 119.8 2_556 . ?
C402 C401 H401 119.8 . . ?
C401 C402 C403 121.9(13) . . ?
C401 C402 H402 119 . . ?
C403 C402 H402 119 . . ?
C401 C403 C402 117.7(14) 2_556 . ?
C401 C403 H403 121.2 2_556 . ?
C402 C403 H403 121.2 . . ?
 
_iucr_refine_instructions_details

;

TITL ps322a in P-1
CELL  1.54178  16.7862  19.0439  19.1721   63.626   88.450   64.963
ZERR     2.00   0.0010   0.0012   0.0014    0.007    0.005    0.006
LATT   1
SFAC  C    H    N    O    CL   RU   AG
UNIT  196  252  16   16   10   4    2
MERG   2
eqiv   $1 2-x,1-y,-z
dfix  1.394 .02 C301 C302 C302 C303 C301 C303_$1
dfix  1.52 .02 C242 C243  C872 C873
dfix  1.394 .03 C101 C102 C102 C103 C103 C104 C104 C105 C105 C106 c106 C101
dfix  2.44 .03 C101 C103 C102 C104 C103 C105 C104 C106 C105 C101 C106 C102
dfix  1.394 .03 C201 C202 C202 C203 C203 C204 C204 C205 C205 C206 c206 C201
dfix  2.44 .03 C201 C203 C202 C204 C203 C205 C204 C206 C205 C201 C206 C202
simu .02 .02 C201 > C206
delu  .02 .02 C201 > C206
simu .01 .01 C472 > C474
delu  .01 .01 C472 > C474
isor .01 .01 C87a
FMAP   2
PLAN   25
ACTA   134.00
BOND   $H
WGHT     0.14410
L.S.   6
TEMP   -73.00
FVAR     1.10073
RU1   6    0.329771    0.224858    0.750855    11.00000    0.02326    0.03229 =
        0.03223   -0.00760    0.00207   -0.01204
RU2   6    0.540636    0.194617    0.777587    11.00000    0.02329    0.03271 =
        0.03267   -0.00715    0.00219   -0.01229
CL1   5    0.435396    0.251261    0.659214    11.00000    0.02789    0.03896 =
        0.03346   -0.00873    0.00283   -0.01591
CL2   5    0.393407    0.293770    0.796267    11.00000    0.02805    0.03777 =
        0.03779   -0.01195    0.00237   -0.01448
CL3   5    0.474192    0.088789    0.835983    11.00000    0.02940    0.03307 =
        0.03755   -0.00654    0.00122   -0.01388
AG1   7    0.188958    0.996039    0.698605    11.00000    0.07651    0.05967 =
        0.06468   -0.02113    0.00667   -0.02257
CL11  5    0.231113    0.849113    0.785405    11.00000    0.17123    0.07348 =
        0.09384   -0.00824    0.01737   -0.04997
CL12  5    0.124377    1.143870    0.604824    11.00000    0.05753    0.05360 =
        0.07640   -0.02410   -0.01610   -0.01413
C1    1    0.321704    0.192159    0.952274    11.00000    0.04801    0.06130 =
        0.03394   -0.01502    0.00369   -0.03072
AFIX  137
H1A   2    0.376273    0.173489    0.931213    11.00000   -1.50000
H1B   2    0.330176    0.146020    1.006366    11.00000   -1.50000
H1C   2    0.309233    0.246884    0.953120    11.00000   -1.50000
AFIX    0
N21   3    0.167224    0.220728    0.803893    11.00000    0.02783    0.04258 =
        0.04521   -0.01207    0.00819   -0.01888
C22   1    0.247278    0.214211    0.828154    11.00000    0.02981    0.03418 =
        0.03758   -0.00696    0.00484   -0.01173
N23   3    0.245185    0.207416    0.901014    11.00000    0.03497    0.04589 =
        0.03910   -0.01648    0.00931   -0.01949
C23A  1    0.164280    0.210956    0.923522    11.00000    0.04202    0.04408 =
        0.04772   -0.01382    0.01196   -0.02252
C24   1    0.130426    0.207119    0.991504    11.00000    0.06097    0.05996 =
        0.05673   -0.02907    0.02308   -0.03353
O24   4    0.181370    0.203373    1.048671    11.00000    0.08196    0.10580 =
        0.05999   -0.04703    0.03692   -0.06242
C241  1    0.151409    0.194515    1.119965    11.00000    0.09775    0.07997 =
        0.05220   -0.02923    0.02989   -0.04931
AFIX   23
H24A  2    0.156963    0.134514    1.151787    11.00000   -1.20000
H24B  2    0.087466    0.237698    1.108115    11.00000   -1.20000
AFIX    0
C242  1    0.205137    0.209753    1.164768    11.00000    0.12506    0.12719 =
        0.07922   -0.05890    0.03279   -0.06489
AFIX   23
H24C  2    0.191868    0.272567    1.135659    11.00000   -1.20000
H24D  2    0.186867    0.198583    1.216670    11.00000   -1.20000
AFIX    0
C243  1    0.300846    0.155566    1.178682    11.00000    0.15345    0.08899 =
        0.08437   -0.02722   -0.01855   -0.02686
AFIX   23
H24E  2    0.319804    0.168874    1.126859    11.00000   -1.20000
H24F  2    0.313992    0.092757    1.205568    11.00000   -1.20000
AFIX    0
C244  1    0.357570    0.169666    1.230602    11.00000    0.13138    0.18785 =
        0.11150   -0.07315   -0.02423   -0.05160
AFIX  137
H24G  2    0.333214    0.232828    1.213272    11.00000   -1.50000
H24H  2    0.420120    0.146283    1.224313    11.00000   -1.50000
H24I  2    0.354713    0.138673    1.286566    11.00000   -1.50000
AFIX    0
C25   1    0.046677    0.209747    0.994032    11.00000    0.07016    0.08499 =
        0.07384   -0.04293    0.04184   -0.04857
AFIX   43
H25   2    0.023019    0.203976    1.040758    11.00000   -1.20000
AFIX    0
C26   1   -0.003974    0.220566    0.930373    11.00000    0.04752    0.08241 =
        0.07865   -0.03579    0.03100   -0.03844
AFIX   43
H26   2   -0.061648    0.223288    0.934239    11.00000   -1.20000
AFIX    0
C27   1    0.027738    0.227337    0.862464    11.00000    0.03933    0.05478 =
        0.06888   -0.02327    0.02065   -0.02369
O27   4   -0.017524    0.243127    0.794022    11.00000    0.03361    0.07162 =
        0.07260   -0.03088    0.01641   -0.02726
C271  1   -0.107408    0.255436    0.792469    11.00000    0.02880    0.07153 =
        0.07830   -0.01207    0.00636   -0.02081
AFIX   23
H27A  2   -0.143817    0.304062    0.804195    11.00000   -1.20000
H27B  2   -0.108419    0.200960    0.833143    11.00000   -1.20000
AFIX    0
C272  1   -0.145288    0.277253    0.711437    11.00000    0.03165    0.04981 =
        0.08316   -0.01803    0.00356   -0.01564
AFIX   23
H27C  2   -0.207374    0.284723    0.710700    11.00000   -1.20000
H27D  2   -0.148706    0.334709    0.672619    11.00000   -1.20000
AFIX    0
C273  1   -0.095038    0.211907    0.684334    11.00000    0.05138    0.07033 =
        0.07795   -0.00884   -0.01799   -0.02419
AFIX   23
H27E  2   -0.082613    0.152506    0.727032    11.00000   -1.20000
H27F  2   -0.036620    0.211925    0.675766    11.00000   -1.20000
AFIX    0
C274  1   -0.143037    0.228386    0.608718    11.00000    0.07565    0.09697 =
        0.08914   -0.02987   -0.00600   -0.04372
AFIX  137
H27G  2   -0.195463    0.217780    0.619190    11.00000   -1.50000
H27H  2   -0.102175    0.188414    0.590222    11.00000   -1.50000
H27I  2   -0.162529    0.289623    0.567819    11.00000   -1.50000
AFIX    0
C27A  1    0.115089    0.218759    0.861869    11.00000    0.03868    0.04503 =
        0.04529   -0.01545    0.01157   -0.02103
C2    1    0.157785    0.212209    0.733953    11.00000    0.02584    0.04973 =
        0.04665   -0.01385    0.00588   -0.02055
AFIX   23
H2A   2    0.126656    0.271128    0.686631    11.00000   -1.20000
H2B   2    0.122643    0.179895    0.740034    11.00000   -1.20000
AFIX    0
C31   1    0.287787    0.193962    0.657100    11.00000    0.03075    0.04261 =
        0.04403   -0.02171    0.00783   -0.01794
C32   1    0.253095    0.160839    0.725026    11.00000    0.02851    0.03765 =
        0.04540   -0.01707    0.00224   -0.01719
C33   1    0.293806    0.067593    0.777957    11.00000    0.04036    0.04610 =
        0.04227   -0.01209    0.00510   -0.02764
AFIX   43
H33   2    0.271650    0.045994    0.824993    11.00000   -1.20000
AFIX    0
C34   1    0.361786    0.010400    0.763071    11.00000    0.04244    0.03377 =
        0.06272   -0.01640   -0.00225   -0.01542
AFIX   43
H34   2    0.387638   -0.050991    0.799227    11.00000   -1.20000
AFIX    0
C35   1    0.394945    0.041432    0.693642    11.00000    0.03518    0.04101 =
        0.06164   -0.02356    0.00312   -0.01030
AFIX   43
H35   2    0.441316    0.000498    0.681646    11.00000   -1.20000
AFIX    0
C36   1    0.361760    0.128651    0.643776    11.00000    0.03384    0.04454 =
        0.04792   -0.01680    0.00740   -0.01397
AFIX   43
H36   2    0.387481    0.147971    0.598621    11.00000   -1.20000
AFIX    0
C3    1    0.238288    0.282842    0.582623    11.00000    0.04182    0.04461 =
        0.03415   -0.01214    0.00424   -0.02357
AFIX   23
H3A   2    0.278685    0.289627    0.544266    11.00000   -1.20000
H3B   2    0.186011    0.285000    0.557414    11.00000   -1.20000
AFIX    0
N41   3    0.180903    0.416849    0.677295    11.00000    0.02847    0.03115 =
        0.04359   -0.01243    0.00467   -0.01000
C42   1    0.231969    0.339876    0.674807    11.00000    0.02937    0.04055 =
        0.03924   -0.01241    0.00536   -0.02061
N43   3    0.207682    0.355380    0.601431    11.00000    0.02968    0.03611 =
        0.03161   -0.00524   -0.00151   -0.01188
C43A  1    0.144935    0.443444    0.554041    11.00000    0.03079    0.03776 =
        0.03952   -0.00889    0.00631   -0.01928
C44   1    0.108338    0.491845    0.471673    11.00000    0.02616    0.03951 =
        0.03851   -0.00528   -0.00412   -0.01317
O44   4    0.135361    0.447063    0.430299    11.00000    0.05256    0.04507 =
        0.03749   -0.01141   -0.00096   -0.01849
C441  1    0.100412    0.494678    0.346657    11.00000    0.04333    0.05051 =
        0.03989   -0.00801   -0.00248   -0.02489
AFIX   23
H44A  2    0.115990    0.543889    0.320789    11.00000   -1.20000
H44B  2    0.034264    0.519484    0.336348    11.00000   -1.20000
AFIX    0
C442  1    0.141137    0.431360    0.314317    11.00000    0.06482    0.06294 =
        0.05075   -0.02185    0.00410   -0.03191
AFIX   23
H44C  2    0.127470    0.381178    0.342991    11.00000   -1.20000
H44D  2    0.207134    0.407716    0.324963    11.00000   -1.20000
AFIX    0
C443  1    0.108578    0.471426    0.226913    11.00000    0.08791    0.10722 =
        0.06133   -0.04308   -0.00100   -0.03067
AFIX   23
H44E  2    0.116228    0.525352    0.198084    11.00000   -1.20000
H44F  2    0.043864    0.488596    0.216438    11.00000   -1.20000
AFIX    0
C444  1    0.160417    0.406331    0.196265    11.00000    0.14115    0.14344 =
        0.09151   -0.07497    0.03287   -0.06073
AFIX  137
H44G  2    0.224961    0.381552    0.214571    11.00000   -1.50000
H44H  2    0.146184    0.437154    0.138068    11.00000   -1.50000
H44I  2    0.143276    0.358635    0.216546    11.00000   -1.50000
AFIX    0
C45   1    0.052852    0.580712    0.442958    11.00000    0.03929    0.04152 =
        0.03847   -0.00114   -0.00357   -0.01926
AFIX   43
H45   2    0.027328    0.616504    0.387830    11.00000   -1.20000
AFIX    0
C46   1    0.032831    0.619966    0.491798    11.00000    0.03482    0.03348 =
        0.04965   -0.00700   -0.00041   -0.00781
AFIX   43
H46   2   -0.007148    0.681201    0.469223    11.00000   -1.20000
AFIX    0
C47   1    0.069401    0.572470    0.572103    11.00000    0.03027    0.03464 =
        0.04825   -0.01261    0.00267   -0.00810
O47   4    0.055728    0.604826    0.624629    11.00000    0.05264    0.03437 =
        0.05239   -0.01291    0.00068   -0.00843
C471  1    0.011211    0.699125    0.593359    11.00000    0.06062    0.03998 =
        0.06461   -0.01845   -0.00148   -0.01049
AFIX   23
H47A  2   -0.051001    0.724440    0.565761    11.00000   -1.20000
H47B  2    0.043511    0.726271    0.554992    11.00000   -1.20000
AFIX    0
C472  1    0.010929    0.716422    0.662009    11.00000    0.12143    0.04296 =
        0.08937   -0.03292   -0.00045   -0.00716
AFIX   23
H47C  2   -0.021332    0.688341    0.699594    11.00000   -1.20000
H47D  2   -0.022751    0.780813    0.642450    11.00000   -1.20000
AFIX    0
C473  1    0.103409    0.682885    0.706291    11.00000    0.15242    0.07402 =
        0.09959   -0.03791   -0.02209   -0.02565
AFIX   23
H47E  2    0.138139    0.707020    0.668710    11.00000   -1.20000
H47F  2    0.135703    0.617730    0.731050    11.00000   -1.20000
AFIX    0
C474  1    0.095329    0.711268    0.770817    11.00000    0.19013    0.09147 =
        0.10944   -0.05281   -0.02634   -0.01645
AFIX  137
H47G  2    0.068380    0.775738    0.745743    11.00000   -1.50000
H47H  2    0.155076    0.685356    0.802139    11.00000   -1.50000
H47I  2    0.057380    0.690802    0.805696    11.00000   -1.50000
AFIX    0
C47A  1    0.127290    0.481850    0.602155    11.00000    0.02841    0.03510 =
        0.03972   -0.00544    0.00194   -0.01313
C4    1    0.176275    0.427976    0.748013    11.00000    0.03653    0.03947 =
        0.04985   -0.01996    0.00674   -0.00990
AFIX  137
H4A   2    0.219068    0.372838    0.793463    11.00000   -1.50000
H4B   2    0.115454    0.443205    0.758793    11.00000   -1.50000
H4C   2    0.191193    0.475366    0.739325    11.00000   -1.50000
AFIX    0
C5    1    0.587590    0.075858    0.664756    11.00000    0.03876    0.05121 =
        0.05766   -0.02360    0.00613   -0.02078
AFIX  137
H5A   2    0.540491    0.076680    0.696179    11.00000   -1.50000
H5B   2    0.612867    0.021458    0.660537    11.00000   -1.50000
H5C   2    0.561983    0.126922    0.611514    11.00000   -1.50000
AFIX    0
N61   3    0.731786    0.092062    0.785529    11.00000    0.03110    0.04036 =
        0.04743   -0.01761    0.00863   -0.01592
C62   1    0.646451    0.115668    0.752378    11.00000    0.02553    0.03214 =
        0.03729   -0.01052    0.00535   -0.01041
N63   3    0.658408    0.079614    0.703633    11.00000    0.02466    0.04135 =
        0.05337   -0.01742    0.00812   -0.01169
C63A  1    0.750917    0.035298    0.704475    11.00000    0.03410    0.04420 =
        0.06403   -0.02072    0.01718   -0.01852
C64   1    0.793965   -0.006970    0.661397    11.00000    0.05159    0.06406 =
        0.07918   -0.04016    0.02583   -0.02979
O64   4    0.743416   -0.010318    0.609231    11.00000    0.06128    0.09521 =
        0.09285   -0.06782    0.03422   -0.03900
C641  1    0.781921   -0.034044    0.551047    11.00000    0.10137    0.14038 =
        0.12931   -0.10051    0.07497   -0.07391
AFIX   23
H64A  2    0.828501   -0.096436    0.577305    11.00000   -1.20000
H64B  2    0.810558    0.003259    0.520785    11.00000   -1.20000
AFIX    0
C642  1    0.709143   -0.021303    0.495421    11.00000    0.12332    0.09845 =
        0.07870   -0.05629    0.03486   -0.03845
AFIX   23
H64C  2    0.663604    0.041484    0.469688    11.00000   -1.20000
H64D  2    0.735805   -0.034061    0.453130    11.00000   -1.20000
AFIX    0
C643  1    0.662802   -0.076894    0.533074    11.00000    0.09342    0.11722 =
        0.09313   -0.05950    0.00820   -0.04010
AFIX   23
H64E  2    0.613362   -0.060917    0.493184    11.00000   -1.20000
H64F  2    0.636804   -0.066161    0.576462    11.00000   -1.20000
AFIX    0
C644  1    0.728986   -0.172879    0.565785    11.00000    0.15586    0.11492 =
        0.13418   -0.05263    0.01157   -0.05948
AFIX  137
H64G  2    0.764933   -0.180708    0.526249    11.00000   -1.50000
H64H  2    0.696546   -0.207995    0.578129    11.00000   -1.50000
H64I  2    0.768535   -0.192377    0.614258    11.00000   -1.50000
AFIX    0
C65   1    0.888067   -0.044516    0.676067    11.00000    0.04737    0.07216 =
        0.10738   -0.05213    0.03609   -0.03038
AFIX   43
H65   2    0.921040   -0.073047    0.647248    11.00000   -1.20000
AFIX    0
C66   1    0.933989   -0.039983    0.733712    11.00000    0.03817    0.06884 =
        0.10691   -0.04516    0.02346   -0.02499
AFIX   43
H66   2    0.997708   -0.068032    0.744037    11.00000   -1.20000
AFIX    0
C67   1    0.891043    0.002571    0.774730    11.00000    0.03171    0.04802 =
        0.07569   -0.02018    0.01363   -0.01466
O67   4    0.928645    0.009499    0.832436    11.00000    0.02550    0.06034 =
        0.06865   -0.02021    0.00006   -0.01332
C671  1    1.025222   -0.026172    0.848038    11.00000    0.03415    0.06510 =
        0.07931   -0.02187    0.00782   -0.01634
AFIX   23
H67A  2    1.045787    0.001738    0.798972    11.00000   -1.20000
H67B  2    1.054289   -0.090632    0.867509    11.00000   -1.20000
AFIX    0
C672  1    1.048483   -0.006528    0.910091    11.00000    0.04657    0.07344 =
        0.10698   -0.03563   -0.00863   -0.01820
AFIX   23
H67C  2    1.031297   -0.038600    0.959741    11.00000   -1.20000
H67D  2    1.012895    0.057392    0.892077    11.00000   -1.20000
AFIX    0
C673  1    1.148185   -0.032331    0.927868    11.00000    0.06178    0.09176 =
        0.09557   -0.02568   -0.00471   -0.04301
AFIX   23
H67E  2    1.167542   -0.007582    0.877098    11.00000   -1.20000
H67F  2    1.156270   -0.005513    0.959337    11.00000   -1.20000
AFIX    0
C674  1    1.206453   -0.128746    0.971800    11.00000    0.05293    0.13599 =
        0.11440   -0.05693   -0.01721   -0.01544
AFIX  137
H67G  2    1.189929   -0.153434    1.023448    11.00000   -1.50000
H67H  2    1.269228   -0.140726    0.979881    11.00000   -1.50000
H67I  2    1.198806   -0.155956    0.941175    11.00000   -1.50000
AFIX    0
C67A  1    0.795790    0.043270    0.756882    11.00000    0.03656    0.03946 =
        0.05509   -0.01569    0.00969   -0.01651
C6    1    0.738605    0.118259    0.844477    11.00000    0.02660    0.04081 =
        0.05217   -0.01130   -0.00371   -0.00952
AFIX   23
H6A   2    0.739208    0.176008    0.818881    11.00000   -1.20000
H6B   2    0.794825    0.074122    0.884465    11.00000   -1.20000
AFIX    0
C71   1    0.592980    0.201312    0.884176    11.00000    0.02957    0.04226 =
        0.03645   -0.01330    0.00029   -0.01568
C72   1    0.658271    0.124721    0.884017    11.00000    0.03200    0.03531 =
        0.03748   -0.00417   -0.00475   -0.01508
C73   1    0.666941    0.040115    0.942195    11.00000    0.02950    0.04205 =
        0.04159   -0.00559   -0.00651   -0.01042
AFIX   43
H73   2    0.708945   -0.011574    0.940755    11.00000   -1.20000
AFIX    0
C74   1    0.616414    0.032672    0.998985    11.00000    0.04542    0.05159 =
        0.03805   -0.00293   -0.00149   -0.02686
AFIX   43
H74   2    0.623021   -0.023661    1.036911    11.00000   -1.20000
AFIX    0
C75   1    0.553895    0.109412    1.001236    11.00000    0.04134    0.06102 =
        0.03400   -0.01358    0.00133   -0.02573
AFIX   43
H75   2    0.519870    0.103740    1.042027    11.00000   -1.20000
AFIX    0
C76   1    0.541252    0.190176    0.947268    11.00000    0.03247    0.05636 =
        0.04269   -0.02033    0.00034   -0.01872
AFIX   43
H76   2    0.498272    0.240532    0.950149    11.00000   -1.20000
AFIX    0
C7    1    0.595576    0.288967    0.847837    11.00000    0.03813    0.04845 =
        0.04408   -0.01034    0.00176   -0.02046
AFIX   23
H7A   2    0.542227    0.332236    0.855590    11.00000   -1.20000
H7B   2    0.649482    0.281390    0.876116    11.00000   -1.20000
AFIX    0
N81   3    0.590924    0.329529    0.648877    11.00000    0.03142    0.04247 =
        0.04177   -0.01508    0.00761   -0.01912
C82   1    0.578762    0.288597    0.722960    11.00000    0.02398    0.03302 =
        0.03761   -0.00779    0.00334   -0.00790
N83   3    0.597287    0.323708    0.764224    11.00000    0.03451    0.03595 =
        0.04238   -0.00858    0.00110   -0.01521
C83A  1    0.618109    0.390105    0.716352    11.00000    0.03240    0.03820 =
        0.04844   -0.01664    0.01960   -0.01797
C84   1    0.641613    0.446514    0.728725    11.00000    0.04495    0.05029 =
        0.06417   -0.02643    0.00553   -0.02264
O84   4    0.644076    0.437834    0.803530    11.00000    0.07949    0.05607 =
        0.06849   -0.02621    0.01163   -0.04385
C841  1    0.664194    0.498917    0.815492    11.00000    0.11556    0.07271 =
        0.09006   -0.04028    0.01067   -0.05353
AFIX   23
H84A  2    0.613294    0.559076    0.787778    11.00000   -1.20000
H84B  2    0.718199    0.500604    0.794368    11.00000   -1.20000
AFIX    0
C842  1    0.680195    0.466882    0.902961    11.00000    0.13462    0.08744 =
        0.08895   -0.04571    0.00436   -0.06101
AFIX   23
H84C  2    0.627325    0.461020    0.923423    11.00000   -1.20000
H84D  2    0.685964    0.511649    0.912551    11.00000   -1.20000
AFIX    0
C843  1    0.763650    0.378767    0.949286    11.00000    0.14562    0.10563 =
        0.09329   -0.03018    0.00423   -0.05188
AFIX   23
H84E  2    0.755425    0.333238    0.943016    11.00000   -1.20000
H84F  2    0.815449    0.383365    0.925439    11.00000   -1.20000
AFIX    0
C844  1    0.785509    0.348835    1.034738    11.00000    0.20089    0.12354 =
        0.10575   -0.04195   -0.00273   -0.08386
AFIX  137
H84G  2    0.801822    0.389200    1.041990    11.00000   -1.50000
H84H  2    0.836022    0.289275    1.060614    11.00000   -1.50000
H84I  2    0.733227    0.348114    1.058467    11.00000   -1.50000
AFIX    0
C85   1    0.661238    0.505135    0.664596    11.00000    0.05767    0.05763 =
        0.08358   -0.02064    0.00932   -0.03760
AFIX   43
H85   2    0.677395    0.544129    0.671513    11.00000   -1.20000
AFIX    0
C86   1    0.657999    0.508483    0.591292    11.00000    0.06290    0.05797 =
        0.06509   -0.01538    0.01355   -0.03649
AFIX   43
H86   2    0.671410    0.550025    0.549142    11.00000   -1.20000
AFIX    0
C87   1    0.636062    0.453758    0.577701    11.00000    0.03428    0.04598 =
        0.06316   -0.01543    0.00850   -0.02179
O87   4    0.634079    0.450092    0.508172    11.00000    0.05994    0.06232 =
        0.04870   -0.01303    0.01718   -0.04178
C871  1    0.679711    0.489324    0.452062    11.00000    0.08212    0.07308 =
        0.07035   -0.02186    0.03325   -0.05748
AFIX   23
H87A  2    0.738098    0.474808    0.479319    11.00000   -1.20000
H87B  2    0.643347    0.554286    0.423293    11.00000   -1.20000
AFIX    0
C872  1    0.694284    0.451187    0.393036    11.00000    0.09270    0.11826 =
        0.06581   -0.01613    0.03187   -0.06546
AFIX   23
H87C  2    0.732681    0.470615    0.357010    11.00000   -1.20000
H87D  2    0.724863    0.385909    0.422864    11.00000   -1.20000
AFIX    0
C873  1    0.607806    0.482128    0.346957    11.00000    0.07001    0.08126 =
        0.07608   -0.00144    0.01781   -0.01128
AFIX   23
H87E  2    0.573823    0.547188    0.322346    11.00000   -1.20000
H87F  2    0.572252    0.456353    0.381899    11.00000   -1.20000
AFIX    0
C874  1    0.625225    0.452719    0.280005    11.00000    0.15805    0.19580 =
        0.09491   -0.08569    0.04748   -0.11177
AFIX  137
H87G  2    0.649696    0.487428    0.239767    11.00000   -1.50000
H87H  2    0.568589    0.462661    0.255047    11.00000   -1.50000
H87I  2    0.668130    0.389937    0.303922    11.00000   -1.50000
AFIX    0
C87A  1    0.619914    0.392316    0.644983    11.00000    0.05244    0.02578 =
        0.06021   -0.02055    0.03483   -0.02643
C8    1    0.584469    0.310055    0.584481    11.00000    0.04411    0.05390 =
        0.04298   -0.02056    0.01321   -0.02999
AFIX  137
H8A   2    0.584941    0.252567    0.605999    11.00000   -1.50000
H8B   2    0.635596    0.308666    0.558198    11.00000   -1.50000
H8C   2    0.528527    0.355831    0.545921    11.00000   -1.50000
AFIX    0
C101  1    0.521922    0.257111    0.437070    11.00000    0.28753    0.11675 =
        0.08185   -0.02685   -0.03711   -0.07870
AFIX   43
H101  2    0.508367    0.274315    0.477202    11.00000   -1.20000
AFIX    0
C102  1    0.459686    0.248458    0.404288    11.00000    0.29821    0.17094 =
        0.21577   -0.10020   -0.04809   -0.05357
AFIX   43
H102  2    0.404498    0.256574    0.421772    11.00000   -1.20000
AFIX    0
C103  1    0.479721    0.227009    0.343387    11.00000    0.29110    0.21102 =
        0.22519   -0.14420   -0.06228   -0.06844
AFIX   43
H103  2    0.440013    0.215169    0.321263    11.00000   -1.20000
AFIX    0
C104  1    0.557415    0.222819    0.314789    11.00000    0.36297    0.16636 =
        0.09949   -0.04396    0.04174   -0.12394
AFIX   43
H104  2    0.565969    0.216194    0.268468    11.00000   -1.20000
AFIX    0
C105  1    0.622787    0.227986    0.351614    11.00000    0.28126    0.14081 =
        0.24524   -0.08202    0.08524   -0.11981
AFIX   43
H105  2    0.677367    0.221822    0.333450    11.00000   -1.20000
AFIX    0
C106  1    0.605060    0.242565    0.416217    11.00000    0.44197    0.18242 =
        0.24020   -0.12440    0.06001   -0.18377
AFIX   43
H106  2    0.649358    0.242614    0.445979    11.00000   -1.20000
AFIX    0
C201  1    0.519509    0.299036    0.075751    11.00000    0.22745    0.26912 =
        0.20542   -0.16271    0.10185   -0.16881
AFIX   43
H201  2    0.571424    0.254589    0.115963    11.00000   -1.20000
AFIX    0
C202  1    0.439366    0.292854    0.075907    11.00000    0.22201    0.25740 =
        0.21242   -0.17114    0.11460   -0.15889
AFIX   43
H202  2    0.435339    0.245341    0.119733    11.00000   -1.20000
AFIX    0
C203  1    0.365199    0.354148    0.013839    11.00000    0.21958    0.25631 =
        0.21977   -0.19260    0.10127   -0.14406
AFIX   43
H203  2    0.312689    0.346563    0.014870    11.00000   -1.20000
AFIX    0
C204  1    0.367877    0.426924   -0.050075    11.00000    0.23112    0.26960 =
        0.19458   -0.18197    0.10377   -0.12057
AFIX   43
H204  2    0.318223    0.468517   -0.093207    11.00000   -1.20000
AFIX    0
C205  1    0.443646    0.436160   -0.048454    11.00000    0.24484    0.26854 =
        0.19991   -0.14724    0.11544   -0.14367
AFIX   43
H205  2    0.445944    0.486140   -0.090331    11.00000   -1.20000
AFIX    0
C206  1    0.518970    0.373363    0.013876    11.00000    0.23802    0.28055 =
        0.21901   -0.14134    0.10259   -0.17459
AFIX   43
H206  2    0.570535    0.382383    0.013302    11.00000   -1.20000
AFIX    0
C301  1    0.929636    0.492364    0.038765    11.00000    0.17308    0.09778 =
        0.26417    0.04888   -0.08266   -0.03899
AFIX   43
H301  2    0.882645    0.486157    0.065522    11.00000   -1.20000
AFIX    0
C302  1    0.978486    0.436197    0.010625    11.00000    0.23967    0.09534 =
        0.29024    0.01243   -0.17395   -0.05534
AFIX   43
H302  2    0.963494    0.391126    0.017046    11.00000   -1.20000
AFIX    0
C303  1    1.048851    0.441540   -0.026844    11.00000    0.24483    0.09974 =
        0.28357   -0.00285   -0.15869   -0.04018
AFIX   43
H303  2    1.082091    0.399858   -0.044223    11.00000   -1.20000
AFIX    0
C401  1   -0.058147    0.088778    0.473916    11.00000    0.10728    0.11368 =
        0.13446   -0.06145    0.04010   -0.07060
AFIX   43
H401  2   -0.097821    0.149015    0.457505    11.00000   -1.20000
AFIX    0
C402  1    0.012217    0.042229    0.537484    11.00000    0.11625    0.13479 =
        0.10289   -0.07293    0.04133   -0.08426
AFIX   43
H402  2    0.021397    0.071827    0.562970    11.00000   -1.20000
AFIX    0
C403  1    0.071288   -0.048484    0.565959    11.00000    0.10239    0.15677 =
        0.10543   -0.07635    0.04615   -0.08695
AFIX   43
H403  2    0.118316   -0.080390    0.610988    11.00000   -1.20000
AFIX    0
HKLF    4
END
;
#===END
